# Supplementary material
Source: publisher figshare collection journal article supplement (https://tandf.figshare.com/articles/dataset/_/11467320)
Supplement: Supplementary file 1 [file 25350554]

# Synthesis, molecular docking and QSAR study of thiazole clubbed pyrazole hybrid as $\alpha$ -amylase inhibitor

Meenakshi Duhan<sup>a</sup>, Rahul Singh<sup>a</sup>, Meena Devi<sup>a</sup>, Jayant Sindhu<sup>b</sup>, Rimpay Bhatia<sup>a</sup>, Ashwani Kumar<sup>c</sup>, Parvin Kumar<sup>a\*</sup>

<sup>a</sup>Department of Chemistry, Kurukshetra University Kurukshetra-136119

<sup>b</sup>Department of Chemistry, COBS&H, CCS Haryana Agricultural University, Hisar-125004

<sup>c</sup>Department of Pharmaceutical Sciences, Guru Jambheshwar University of Science and Technology, Hisar, Haryana, India- 125001

\*E.mail: [parvinjangra@gmail.com](mailto:parvinjangra@gmail.com); [parvinchem@kuk.ac.in](mailto:parvinchem@kuk.ac.in)

|                                                                                                                                                                           |    |
|---------------------------------------------------------------------------------------------------------------------------------------------------------------------------|----|
| Experimental.....                                                                                                                                                         | 2  |
| Synthesis of 1-((1-phenyl-3-aryl-1 <i>H</i> -pyrazole-4-yl)methylene)-2-(4-arylthiazole-2-yl) hydrazine (4a-4r) .....                                                     | 2  |
| Spectral data .....                                                                                                                                                       | 2  |
| Table S 1: Percentage of identity of splits 1–4.....                                                                                                                      | 5  |
| Table S 2: Details of statistical outcomes by using IIC.....                                                                                                              | 6  |
| Table S 3: Details of statistical outcomes without IIC.....                                                                                                               | 9  |
| Table S 4: External prediction criteria values for developed QSAR models of calibration and validation sets. Without IIC, using equation.....                             | 12 |
| Table S 5: External prediction criteria values for developed QSAR models of calibration and validation sets. For SMILES with IIC using equation .....                     | 13 |
| Table S 6: Y-randomization results for four splits For Smiles Without IIC using equation .....                                                                            | 13 |
| Table S 7: Y-randomization results for four splits For Smiles With IIC using equation.....                                                                                | 14 |
| Figure 1: <sup>1</sup> H NMR of 1-((3-(4-Bromophenyl)-1-phenyl-1 <i>H</i> -pyrazole-4-yl)methylene)-2-(4-(4-bromophenyl)thiazol-2-yl)hydrazine (4a) .....                 | 15 |
| Figure 2: <sup>13</sup> C NMR of 1-((3-(4-Bromophenyl)-1-phenyl-1 <i>H</i> -pyrazole-4-yl)methylene)-2-(4-(4-bromophenyl)thiazol-2-yl)hydrazine (4a) .....                | 15 |
| Figure 3: <sup>1</sup> H- <sup>1</sup> H Cosy of 1-((3-(4-Bromophenyl)-1-phenyl-1 <i>H</i> -pyrazole-4-yl)methylene)-2-(4-(4-bromophenyl)thiazol-2-yl)hydrazine (4a)..... | 16 |
| Figure 4: <sup>1</sup> H NMR 1-((3-(4-Bromophenyl)-1-phenyl-1 <i>H</i> -pyrazole-4-yl)methylene)-2-(4-(4-chlorophenyl)thiazol-2-yl)hydrazine (4b).....                    | 16 |
| Figure 5: <sup>13</sup> C NMR of 1-((3-(4-Bromophenyl)-1-phenyl-1 <i>H</i> -pyrazole-4-yl)methylene)-2-(4-(4-chlorophenyl)thiazol-2-yl)hydrazine (4b) .....               | 17 |
| Figure 6: <sup>1</sup> H NMR of 1-((3-(4-Bromophenyl)-1-phenyl-1 <i>H</i> -pyrazole-4-yl)methylene)-2-(4-(4-nitrophenyl)thiazol-2-yl)hydrazine (4c) .....                 | 17 |
| Figure 7: <sup>13</sup> C NMR of 1-((3-(4-Bromophenyl)-1-phenyl-1 <i>H</i> -pyrazole-4-yl)methylene)-2-(4-(4-nitrophenyl)thiazol-2-yl)hydrazine (4c).....                 | 18 |
| Figure 8: <sup>1</sup> H NMR of 1-((3-(4-Methoxyphenyl)-1-phenyl-1 <i>H</i> -pyrazole-4-yl)methylene)-2-(4-(4-bromophenyl) thiazol-2-yl)hydrazine (4d).....               | 18 |
| Figure 9: <sup>13</sup> C NMR of 1-((3-(4-Methoxyphenyl)-1-phenyl-1 <i>H</i> -pyrazole-4-yl)methylene)-2-(4-(4-bromophenyl) thiazol-2-yl)hydrazine (4d).....              | 19 |
| Figure 10: <sup>1</sup> H NMR of 1-((3-(4-Methoxyphenyl)-1-phenyl-1 <i>H</i> -pyrazole-4-yl)methylene)-2-(4-(4-chlorophenyl) thiazol-2-yl)hydrazine (4e) .....            | 19 |
| Figure 11: <sup>13</sup> C NMR of 1-((3-(4-Methoxyphenyl)-1-phenyl-1 <i>H</i> -pyrazole-4-yl)methylene)-2-(4-(4-chlorophenyl) thiazol-2-yl)hydrazine (4e) .....           | 20 |
| Figure 12: <sup>1</sup> H NMR of 1-((3-(4-Methoxyphenyl)-1-phenyl-1 <i>H</i> -pyrazole-4-yl)methylene)-2-(4-(4-nitrophenyl) thiazol-2-yl)hydrazine (4f) .....             | 20 |
| Figure 13: <sup>13</sup> C NMR of 1-((3-(4-Methoxyphenyl)-1-phenyl-1 <i>H</i> -pyrazole-4-yl)methylene)-2-(4-(4-nitrophenyl) thiazol-2-yl)hydrazine (4f).....             | 21 |
| Figure 14: <sup>1</sup> H NMR of 1-((3-(4-Methylphenyl)-1-phenyl-1 <i>H</i> -pyrazole-4-yl)methylene)-2-(4-(4-bromophenyl) thiazol-2-yl)hydrazine (4g).....               | 21 |
| Figure 15: <sup>13</sup> C NMR of 1-((3-(4-Methylphenyl)-1-phenyl-1 <i>H</i> -pyrazole-4-yl)methylene)-2-(4-(4-bromophenyl) thiazol-2-yl)hydrazine (4g).....              | 22 |
| Figure 16: <sup>1</sup> H NMR of 1-((3-(4-Methylphenyl)-1-phenyl-1 <i>H</i> -pyrazole-4-yl)methylene)-2-(4-(4-chlorophenyl) thiazol-2-yl)hydrazine (4h) .....             | 22 |
| Figure 17: <sup>13</sup> C NMR of 1-((3-(4-Methylphenyl)-1-phenyl-1 <i>H</i> -pyrazole-4-yl)methylene)-2-(4-(4-chlorophenyl) thiazol-2-yl)hydrazine (4h) .....            | 23 |
| Figure 18: <sup>1</sup> H NMR of 1-((3-(4-Methylphenyl)-1-phenyl-1 <i>H</i> -pyrazole-4-yl)methylene)-2-(4-(4-nitrophenyl)thiazol-2-yl)hydrazine (4i).....                | 23 |
| Figure 19: <sup>13</sup> C NMR of 1-((3-(4-Methylphenyl)-1-phenyl-1 <i>H</i> -pyrazole-4-yl)methylene)-2-(4-(4-nitrophenyl)thiazol-2-yl)hydrazine (4i).....               | 24 |
| Figure 20: <sup>1</sup> H NMR of 1-((3-(4-Fluorophenyl)-1-phenyl-1 <i>H</i> -pyrazole-4-yl)methylene)-2-(4-(4-bromophenyl) thiazol-2-yl)hydrazine (4j).....               | 24 |
| Figure 21: <sup>13</sup> C NMR of 1-((3-(4-Fluorophenyl)-1-phenyl-1 <i>H</i> -pyrazole-4-yl)methylene)-2-(4-(4-bromophenyl) thiazol-2-yl)hydrazine (4j) .....             | 25 |
| Figure 22: <sup>1</sup> H NMR of 1-((3-(4-Fluorophenyl)-1-phenyl-1 <i>H</i> -pyrazole-4-yl)methylene)-2-(4-(4-chlorophenyl)thiazol-2-yl)hydrazine (4k) .....              | 25 |
| Figure 23: <sup>13</sup> C NMR of 1-((3-(4-Fluorophenyl)-1-phenyl-1 <i>H</i> -pyrazole-4-yl)methylene)-2-(4-(4-chlorophenyl)thiazol-2-yl)hydrazine (4k).....              | 26 |
| Figure 24: <sup>1</sup> H NMR of 1-((3-(4-Fluorophenyl)-1-phenyl-1 <i>H</i> -pyrazole-4-yl)methylene)-2-(4-(4-nitrophenyl)thiazol-2-yl)hydrazine (4l).....                | 26 |
| Figure 25: <sup>13</sup> C NMR of 1-((3-(4-Fluorophenyl)-1-phenyl-1 <i>H</i> -pyrazole-4-yl)methylene)-2-(4-(4-nitrophenyl)thiazol-2-yl)hydrazine (4l).....               | 27 |
| Figure 26: <sup>1</sup> H NMR of 1-((3-(4-Chlorophenyl)-1-phenyl-1 <i>H</i> -pyrazole-4-yl)methylene)-2-(4-(4-bromophenyl) thiazol-2-yl)hydrazine (4m) .....              | 27 |
| Figure 27: <sup>13</sup> C NMR of 1-((3-(4-Chlorophenyl)-1-phenyl-1 <i>H</i> -pyrazole-4-yl)methylene)-2-(4-(4-bromophenyl) thiazol-2-yl)hydrazine (4m).....              | 28 |
| Figure 28: <sup>1</sup> H NMR of 1-((3-(4-Chlorophenyl)-1-phenyl-1 <i>H</i> -pyrazole-4-yl)methylene)-2-(4-(4-chlorophenyl) thiazol-2-yl)hydrazine (4n) .....             | 28 |
| Figure 29: <sup>13</sup> C NMR of 1-((3-(4-Chlorophenyl)-1-phenyl-1 <i>H</i> -pyrazole-4-yl)methylene)-2-(4-(4-chlorophenyl) thiazol-2-yl)hydrazine (4n).....             | 29 |
| Figure 30: <sup>1</sup> H NMR of 1-((3-(4-Chlorophenyl)-1-phenyl-1 <i>H</i> -pyrazole-4-yl)methylene)-2-(4-(4-nitrophenyl)thiazol-2-yl)hydrazine (4o) .....               | 29 |
| Figure 31: <sup>13</sup> C NMR of 1-((3-(4-Chlorophenyl)-1-phenyl-1 <i>H</i> -pyrazole-4-yl)methylene)-2-(4-(4-nitrophenyl)thiazol-2-yl)hydrazine (4o).....               | 30 |
| Figure 32: <sup>1</sup> H NMR of ((1,3-Diphenyl-1 <i>H</i> -pyrazol-4-yl)methylene)-2-(4-(4-bromophenyl)thiazol-2-yl)hydrazine (4p).....                                  | 30 |
| Figure 33: <sup>13</sup> C NMR of ((1,3-Diphenyl-1 <i>H</i> -pyrazol-4-yl)methylene)-2-(4-(4-bromophenyl)thiazol-2-yl)hydrazine (4p).....                                 | 31 |
| Figure 34: <sup>1</sup> H NMR of ((1,3-Diphenyl-1 <i>H</i> -pyrazol-4-yl)methylene)-2-(4-(4-chlorophenyl)thiazol-2-yl)hydrazine (4q) .....                                | 31 |
| Figure 35: <sup>13</sup> C NMR of ((1,3-Diphenyl-1 <i>H</i> -pyrazol-4-yl)methylene)-2-(4-(4-chlorophenyl)thiazol-2-yl)hydrazine (4q).....                                | 31 |
| Figure 36: <sup>1</sup> H NMR of ((1,3-Diphenyl-1 <i>H</i> -pyrazol-4-yl)methylene)-2-(4-(4-nitrophenyl)thiazol-2-yl) (4r) .....                                          | 32 |
| Figure 37: <sup>13</sup> C NMR of ((1,3-Diphenyl-1 <i>H</i> -pyrazol-4-yl)methylene)-2-(4-(4-nitrophenyl)thiazol-2-yl) (4r).....                                          | 32 |

## Experimental

All the reagents including starting reactant were purchased from Sigma Aldrich and Merck. Melting points of compounds were determined in open capillaries and were uncorrected. IR spectra were recorded on Shimadzu IR spectrophotometer. <sup>1</sup>H-NMR and <sup>13</sup>C-NMR were recorded on Bruker (Advance-II) instrument at 400 and 500 MHz in DMSO (*d*<sub>6</sub>) using tetramethylsilane (TMS) as an internal standard. The values of  $\delta$  and coupling constant (*J*) are expressed in ppm and Hz. Mass spectra were recorded on Waters Micro mass Q-Tof Micro.

### Synthesis of 1-((1-phenyl-3-aryl-1*H*-pyrazole-4-yl)methylene)-2-(4-arylthiazole-2-yl) hydrazine (4a-4r)

In 50 mL round bottom flask, a mixture of 1-aryl-3-phenyl-1*H*-pyrazole-4-carbaldehyde (**1a-1f**) (1.0 mmol), thiosemicarbazide (**2**) (1.1 mmol) and  $\alpha$ -bromoacetophenone (**3a-3c**) (1.0 mmol) were refluxed for 5 min in 10 mL of ethanol. Progress of the reaction was monitored on TLC (petroleum ether: ethyl acetate (70:30, *v/v*)). A solid was separated out, which was filtered, dried and recrystallized from ethanol.

### Spectral data

#### 1-((3-(4-Bromophenyl)-1-phenyl-1*H*-pyrazole-4-yl)methylene)-2-(4-(4-bromophenyl) thiazol-2-yl)hydrazine (4a)

**Yield:** 85%; **M.pt:** 220°C (Lit. M.pt(Alegaon et al. 2017): 243-245°C); **IR** ( $\nu_{max}$   $cm^{-1}$ , **KBr**): 3317 (NH Stretch), 1682 (C=N Stretch), 1574 (C=C Stretch); **<sup>1</sup>H-NMR (400 MHz,  $\delta$  (ppm) DMSO-*d*<sub>6</sub>):** 11.92 (s, 1H, NH), 8.81 (s, 1H, -CH=N), 8.17 (s, 1H, pyrazole-H<sub>5</sub>), 7.96 (d, *J* = 8.0 Hz, 2H, H<sub>7</sub>/H<sub>11</sub>), 7.83-7.77 (m, 4H, H<sub>13</sub>/H<sub>17</sub>, H<sub>28</sub>/H<sub>30</sub>), 7.68 (d, *J* = 8.5 Hz, 2H, H<sub>14</sub>/H<sub>16</sub>), 7.56-7.51 (m, 4H, H<sub>27</sub>/H<sub>31</sub>, H<sub>8</sub>/H<sub>10</sub>), 7.36 (t, *J* = 7.4 Hz, 1H, H<sub>9</sub>), 7.26 (s, 1H, thiazole-H<sub>23</sub>); **<sup>13</sup>C-NMR (100 MHz,  $\delta$  (ppm) DMSO-*d*<sub>6</sub>):** 168.05, 163.07, 149.36, 138.91, 134.44, 133.84, 131.55, 131.31, 131.25, 130.33, 129.40, 128.13, 127.38, 126.77, 121.76, 120.39, 118.60, 117.00, 103.96; **ESI-MS (m/z):** 578.02 (M+H), 580.01 (M+H+2), 582.01 (M+H+4); **Anal. Calc. For C<sub>25</sub>H<sub>17</sub>Br<sub>2</sub>N<sub>5</sub>S:** C, 51.83; H, 2.96; N, 12.09. **Found:** C, 51.78; H, 2.91; N, 12.01.

#### 1-((3-(4-Bromophenyl)-1-phenyl-1*H*-pyrazole-4-yl)methylene)-2-(4-(4-chlorophenyl)thiazol-2-yl)hydrazine (4b)

**Yield:** 80%; **M.pt:** 235°C (Lit. M.pt(Alegaon et al. 2017): 238-240°C); **IR** ( $\nu_{max}$   $cm^{-1}$ , **KBr**): 3317 (NH Stretch), 1651 (C=N Stretch), 1574 (C=C Stretch); **<sup>1</sup>H-NMR (400 MHz,  $\delta$  (ppm) DMSO-*d*<sub>6</sub>):** 12.01 (s, 1H, NH), 8.91 (s, 1H, -CH=N), 8.16 (s, 1H, pyrazole-H<sub>5</sub>), 7.98 (d, *J* = 7.7 Hz, 2H, H<sub>7</sub>/H<sub>11</sub>), 7.87 (d, *J* = 8.6 Hz, 2H, H<sub>13</sub>/H<sub>17</sub>), 7.81 (d, *J* = 8.5 Hz, 2H, H<sub>28</sub>/H<sub>30</sub>), 7.73 (d, *J* = 8.5 Hz, 2H, H<sub>27</sub>/H<sub>31</sub>), 7.57-7.53 (m, 2H, H<sub>8</sub>/H<sub>10</sub>), 7.46 (d, *J* = 8.6 Hz, 2H, H<sub>14</sub>/H<sub>16</sub>), 7.43-7.33 (m, 2H, H<sub>9</sub>, thiazole-H<sub>23</sub>); **<sup>13</sup>C-NMR (100 MHz,  $\delta$  (ppm) DMSO-*d*<sub>6</sub>):** 168.03, 149.40, 149.20, 138.91, 134.53, 133.52, 131.84, 131.55, 131.41, 130.51, 129.59, 128.58, 127.17, 126.96, 121.81, 118.68, 116.96, 104.28; **Anal. Calc. For C<sub>25</sub>H<sub>17</sub>BrClN<sub>5</sub>S:** C, 56.14; H, 3.20; N, 13.09. **Found:** C, 56.09; H, 3.17; N, 13.02.

#### 1-((3-(4-Bromophenyl)-1-phenyl-1*H*-pyrazole-4-yl)methylene)-2-(4-(4-nitrophenyl)thiazol-2-yl)hydrazine (4c)

**Yield:** 88%; **M.pt:** 258°C (Lit. M.pt(Alegaon et al. 2017): 248-250°C); **IR** ( $\nu_{max}$   $cm^{-1}$ , **KBr**): 3326 (NH Stretch), 1598 (C=N Stretch), 1580 (C=C Stretch), 1505, 1340 (NO<sub>2</sub> Stretch); **<sup>1</sup>H-NMR (400 MHz,  $\delta$  (ppm) DMSO-*d*<sub>6</sub>):** 12.11 (s, 1H, NH), 8.93 (s, 1H, -CH=N), 8.27 (d, *J* = 8.9 Hz, 2H, H<sub>28</sub>/H<sub>30</sub>), 8.17 (s, 1H, pyrazole-H<sub>5</sub>), 8.10 (d, *J* = 8.9 Hz, 2H, H<sub>27</sub>/H<sub>31</sub>), 7.98 (d, *J* = 7.8 Hz, 2H, H<sub>7</sub>/H<sub>11</sub>), 7.80 (d, *J* = 8.5 Hz, 2H, H<sub>13</sub>/H<sub>17</sub>), 7.73 (d, *J* = 8.5 Hz, 2H, H<sub>14</sub>/H<sub>16</sub>), 7.71 (s, 1H, thiazole-H<sub>23</sub>), 7.57-7.53 (m, 2H, H<sub>8</sub>/H<sub>10</sub>), 7.39 (t, *J* = 7.4 Hz, 1H, H<sub>9</sub>); **<sup>13</sup>C-NMR (100 MHz,  $\delta$  (ppm) DMSO-*d*<sub>6</sub>):** 168.32, 149.44, 148.42, 146.14, 140.65, 138.89, 134.93, 131.54, 131.42, 130.52, 129.60, 128.66, 126.98, 126.28, 124.09, 121.84, 118.69, 116.87, 108.41; **Anal. Calc. For C<sub>25</sub>H<sub>17</sub>BrN<sub>6</sub>O<sub>2</sub>S:** C, 55.05; H, 3.14; N, 15.41. **Found:** C, 55.01; H, 3.08; N, 15.38.

#### 1-((3-(4-Methoxyphenyl)-1-phenyl-1*H*-pyrazole-4-yl)methylene)-2-(4-(4-bromophenyl) thiazol-2-yl)hydrazine (4d)

**Yield:** 82%; **M.pt:** 210°C (Lit. M.pt(Alegaon et al. 2017): 223-225°C); **IR** ( $\nu_{max}$   $cm^{-1}$ , **KBr**): 3310 (NH Stretch), 1612 (C=N Stretch), 1599 (C=C Stretch); **<sup>1</sup>H-NMR (400 MHz,  $\delta$  (ppm) DMSO-*d*<sub>6</sub>):** 11.87 (s, 1H, NH), 8.74 (s, 1H, -CH=N), 8.16 (s, 1H, pyrazole-H<sub>5</sub>), 7.95 (d, *J* = 7.7 Hz, 2H, H<sub>7</sub>/H<sub>11</sub>), 7.78 (d, *J* = 8.6 Hz, 2H, H<sub>27</sub>/H<sub>31</sub>), 7.74 (d, *J* = 8.8 Hz, 2H, H<sub>13</sub>/H<sub>17</sub>), 7.55-7.50 (m, 4H, H<sub>28</sub>/H<sub>30</sub>, H<sub>8</sub>/H<sub>10</sub>), 7.36-7.32 (m, 1H, H<sub>9</sub>), 7.25 (s, 1H, thiazole-H<sub>23</sub>), 7.06 (d, *J* = 8.8 Hz, 2H, H<sub>14</sub>/H<sub>16</sub>), 3.86 (s, 3H, -OCH<sub>3</sub>); **<sup>13</sup>C-NMR (100 MHz,  $\delta$  (ppm) DMSO-*d*<sub>6</sub>):** 168.11, 159.41, 151.92, 150.63, 139.06, 134.87, 132.84, 131.27, 129.62, 129.33, 127.35, 127.04, 126.48, 124.67, 120.36, 118.49, 116.67, 113.78, 111.38, 55.0; **Anal. Calc. For C<sub>26</sub>H<sub>20</sub>BrN<sub>5</sub>OS:** C, 58.87; H, 3.80; N, 13.20. **Found:** C, 58.85; H, 3.75; N, 13.11.

#### 1-((3-(4-Methoxyphenyl)-1-phenyl-1*H*-pyrazole-4-yl)methylene)-2-(4-(4-chlorophenyl) thiazol-2-yl)hydrazine (4e)

**Yield:** 83%; **M.pt:** 190°C (Lit. M.pt(Alegaon et al. 2017): 236-238°C); **IR** ( $\nu_{max}$   $cm^{-1}$ , **KBr**): 3310 (NH Stretch), 1612 (C=N Stretch), 1565 (C=C Stretch); **<sup>1</sup>H-NMR (400 MHz,  $\delta$  (ppm) DMSO-*d*<sub>6</sub>):** 11.88 (s, 1H, NH), 8.74 (s, 1H, -CH=N), 8.15 (s, 1H, pyrazole-H<sub>5</sub>), 7.95-7.92 (m, 2H, H<sub>7</sub>/H<sub>11</sub>), 7.84-7.82 (m, 2H, H<sub>27</sub>/H<sub>31</sub>), 7.73 (d, *J* = 8.4 Hz, 2H, H<sub>13</sub>/H<sub>17</sub>), 7.52-7.48 (m, 2H, H<sub>8</sub>/H<sub>10</sub>), 7.40-7.38 (m, 2H, H<sub>28</sub>/H<sub>30</sub>), 7.34-7.30 (m, 1H, H<sub>9</sub>), 7.22 (s, 1H, thiazole-H<sub>23</sub>), 7.05-7.03 (m, 2H, H<sub>14</sub>/H<sub>16</sub>), 3.84 (s, 3H, OCH<sub>3</sub>); **<sup>13</sup>C-NMR (100 MHz,  $\delta$  (ppm) DMSO-*d*<sub>6</sub>):** 55.07, 103.72, 113.77, 115.91, 116.68, 118.48, 124.68, 126.46, 127.03, 128.36, 129.32, 129.63, 131.91, 133.50, 134.86, 139.07, 149.23, 150.64, 159.41, 168.10; **ESI-MS (m/z):** 486.25 (M+H), 488.27 (M+H+2); **Anal. Calc. For C<sub>26</sub>H<sub>20</sub>ClN<sub>5</sub>OS:** C, 64.26; H, 4.15; N, 14.41. **Found:** C, 64.17; H, 4.09; N, 14.35.

#### 1-((3-(4-Methoxyphenyl)-1-phenyl-1*H*-pyrazole-4-yl)methylene)-2-(4-(4-nitrophenyl) thiazol-2-yl)hydrazine (4f)

**Yield:** 89%; **M.pt:** 230°C (Lit. M.pt(Alegaon et al. 2017): 248-250°C); **IR** ( $\nu_{max}$   $\text{cm}^{-1}$ , **KBr**): 3314 (NH Stretch), 1599 (C=N Stretch), 1509, 1343 (NO<sub>2</sub> Stretch); **<sup>1</sup>H-NMR (400 MHz,  $\delta$  (ppm) DMSO-*d*<sub>6</sub>):** 12.07 (s, 1H, NH), 8.87 (s, 1H, -CH=N), 8.28 (d,  $J$  = 8.9 Hz, 2H, H<sub>28</sub>/H<sub>30</sub>), 8.17 (s, 1H, pyrazole-H<sub>5</sub>), 8.10 (d, 2H,  $J$  = 8.9 Hz, H<sub>27</sub>/H<sub>31</sub>), 7.98 (d,  $J$  = 7.6 Hz, 2H, H<sub>7</sub>/H<sub>11</sub>), 7.74 (d,  $J$  = 8.8 Hz, 2H, H<sub>13</sub>/H<sub>17</sub>), 7.71 (s, 1H, thiazole-H<sub>23</sub>), 7.57-7.53 (m, 2H, H<sub>8</sub>/H<sub>10</sub>), 7.39-7.35 (m, 1H, H<sub>9</sub>), 7.09 (d,  $J$  = 8.8 Hz, 2H, H<sub>14</sub>/H<sub>16</sub>), 3.85 (s, 3H, -OCH<sub>3</sub>); **<sup>13</sup>C-NMR (100 MHz,  $\delta$  (ppm) DMSO-*d*<sub>6</sub>):** 168.38, 159.49, 150.71, 148.40, 146.14, 140.68, 139.03, 135.40, 129.78, 129.55, 127.63, 126.73, 126.28, 124.59, 124.09, 118.60, 116.53, 113.93, 108.33, 55.23; **Anal. Calc. For C<sub>26</sub>H<sub>20</sub>N<sub>6</sub>O<sub>3</sub>S:** C, 62.89; H, 4.06; N, 16.93. **Found:** C, 62.78; H, 3.95; N, 16.87.

**1-((3-(4-Methylphenyl)-1-phenyl-1H-pyrazole-4-yl)methylene)-2-(4-(4-bromophenyl)thiazol-2-yl)hydrazine (4g)**

**Yield:** 85%; **M.pt:** 232.2-234.1°C; **IR** ( $\nu_{max}$   $\text{cm}^{-1}$ , **KBr**): 3454 (NH Stretch), 1595 (C=N Stretch), 1500 (C=C Stretch); **<sup>1</sup>H-NMR (400 MHz,  $\delta$  (ppm) DMSO-*d*<sub>6</sub>):** 11.96 (s, 1H, NH), 8.87 (s, 1H, -CH=N), 8.17 (s, 1H, pyrazole-H<sub>5</sub>), 7.99 (d,  $J$  = 7.7 Hz, 2H, H<sub>7</sub>/H<sub>11</sub>), 7.81 (d,  $J$  = 8.5 Hz, 2H, H<sub>27</sub>/H<sub>31</sub>), 7.70 (d,  $J$  = 8.0 Hz, 2H, H<sub>13</sub>/H<sub>17</sub>), 7.60 (d,  $J$  = 8.6 Hz, 2H, H<sub>28</sub>/H<sub>30</sub>), 7.57-7.53 (m, 2H, H<sub>8</sub>/H<sub>10</sub>), 7.39-7.34 (m, 4H, H<sub>14</sub>/H<sub>16</sub>, H<sub>9</sub>, thiazole-H<sub>23</sub>), 2.41 (s, 3H, -CH<sub>3</sub>); **<sup>13</sup>C-NMR (100 MHz,  $\delta$  (ppm) DMSO-*d*<sub>6</sub>):** 168.58, 151.34, 149.75, 139.55, 138.38, 137.85, 135.47, 134.41, 131.97, 130.04, 129.88, 129.61, 128.79, 127.99, 127.27, 120.91, 119.17, 117.31, 104.79, 21.39; **Anal. Calc. For C<sub>26</sub>H<sub>20</sub>BrN<sub>5</sub>S:** C, 60.70; H, 3.92; N, 13.61. **Found:** C, 60.64; H, 3.87; N, 13.58.

**1-((3-(4-Methylphenyl)-1-phenyl-1H-pyrazole-4-yl)methylene)-2-(4-(4-chlorophenyl)thiazol-2-yl)hydrazine (4h)**

**Yield:** 87%; **M.pt:** 200-203°C; **IR** ( $\nu_{max}$   $\text{cm}^{-1}$ , **KBr**): 3456 (NH Stretch), 1579 (C=N Stretch), 1500 (C=C Stretch); **<sup>1</sup>H-NMR (400 MHz,  $\delta$  (ppm) DMSO-*d*<sub>6</sub>):** 11.97 (s, 1H, NH), 8.87 (s, 1H, -CH=N), 8.17 (s, 1H, pyrazole-H<sub>5</sub>), 7.99 (d,  $J$  = 7.9 Hz, 2H, H<sub>7</sub>/H<sub>11</sub>), 7.87 (d,  $J$  = 8.5 Hz, 2H, H<sub>27</sub>/H<sub>31</sub>), 7.70 (d,  $J$  = 8.0 Hz, 2H, H<sub>13</sub>/H<sub>17</sub>), 7.55 (t,  $J$  = 7.9 Hz, 2H, H<sub>8</sub>/H<sub>10</sub>), 7.47 (d,  $J$  = 8.6 Hz, 2H, H<sub>28</sub>/H<sub>30</sub>), 7.37 (m, 4H, H<sub>14</sub>/H<sub>16</sub>, H<sub>9</sub>, thiazole-H<sub>23</sub>), 2.40 (s, 3H, -CH<sub>3</sub>); **<sup>13</sup>C-NMR (100 MHz,  $\delta$  (ppm) DMSO-*d*<sub>6</sub>):** 168.58, 151.34, 149.70, 139.55, 138.38, 135.45, 134.07, 132.33, 130.03, 129.88, 129.61, 129.06, 128.79, 127.96, 127.67, 127.26, 119.17, 117.32, 104.69, 21.38; **Anal. Calc. For C<sub>26</sub>H<sub>20</sub>ClN<sub>5</sub>S:** C, 66.45; H, 4.29; N, 14.90. **Found:** C, 66.40; H, 4.25; N, 14.86.

**1-((3-(4-Methylphenyl)-1-phenyl-1H-pyrazole-4-yl)methylene)-2-(4-(4-nitrophenyl)thiazol-2-yl)hydrazine (4i)**

**Yield:** 83%; **M.pt:** 244-246°C; **IR** ( $\nu_{max}$   $\text{cm}^{-1}$ , **KBr**): 3315 (NH Stretch), 1604 (C=N Stretch), 1500, 1344 (NO<sub>2</sub> Stretch); **<sup>1</sup>H-NMR (400 MHz,  $\delta$  (ppm) DMSO-*d*<sub>6</sub>):** 12.08 (s, 1H, NH), 8.89 (s, 1H, -CH=N), 8.28 (d,  $J$  = 8.9 Hz, 2H, H<sub>28</sub>/H<sub>30</sub>), 8.18 (s, 1H, pyrazole-H<sub>5</sub>), 8.11 (d,  $J$  = 8.9 Hz, 2H, H<sub>27</sub>/H<sub>31</sub>), 8.00 (d,  $J$  = 7.7 Hz, 2H, H<sub>7</sub>/H<sub>11</sub>), 7.71-7.68 (m, 3H, H<sub>13</sub>/H<sub>17</sub>, thiazole-H<sub>23</sub>), 7.55 (t,  $J$  = 7.9 Hz, 2H, H<sub>8</sub>/H<sub>10</sub>), 7.40-7.34 (m, 3H, H<sub>14</sub>/H<sub>16</sub>, H<sub>9</sub>), 2.41 (s, 3H, CH<sub>3</sub>); **<sup>13</sup>C-NMR (100 MHz,  $\delta$  (ppm) DMSO-*d*<sub>6</sub>):** 168.86, 151.39, 148.92, 146.65, 141.18, 139.53, 138.41, 135.83, 130.04, 129.85, 129.62, 128.80, 128.05, 127.29, 126.78, 124.57, 119.17, 117.22, 108.83, 21.39; **Anal. Calc. For C<sub>26</sub>H<sub>20</sub>N<sub>6</sub>O<sub>2</sub>S:** C, 64.99; H, 4.20; N, 17.49. **Found:** C, 64.96; H, 4.14; N, 17.43.

**1-((3-(4-Fluorophenyl)-1-phenyl-1H-pyrazole-4-yl)methylene)-2-(4-(4-bromophenyl)thiazol-2-yl)hydrazine (4j)**

**Yield:** 79%; **M.pt:** 225.3-226.9°C; **IR** ( $\nu_{max}$   $\text{cm}^{-1}$ , **KBr**): 3456 (NH Stretch), 1581 (C=N Stretch), 1502 (C=C Stretch); **<sup>1</sup>H-NMR (400 MHz,  $\delta$  (ppm) DMSO-*d*<sub>6</sub>):** 11.97 (s, 1H, NH), 8.90 (s, 1H, -CH=N), 8.16 (s, 1H, pyrazole-H<sub>5</sub>), 7.98 (d,  $J$  = 7.8 Hz, 2H, H<sub>7</sub>/H<sub>11</sub>), 7.89-7.8 (m, 2H, H<sub>13</sub>/H<sub>17</sub>), 7.80 (d,  $J$  = 8.5 Hz, 2H, H<sub>27</sub>/H<sub>31</sub>), 7.60 (d,  $J$  = 8.5 Hz, 2H, H<sub>28</sub>/H<sub>30</sub>), 7.56 (t,  $J$  = 7.9 Hz, 2H, H<sub>8</sub>/H<sub>10</sub>), 7.40-7.35 (m, 4H, H<sub>14</sub>/H<sub>16</sub>, H<sub>9</sub>, thiazole-H<sub>23</sub>); **<sup>13</sup>C-NMR (100 MHz,  $\delta$  (ppm) DMSO-*d*<sub>6</sub>):** 168.57, 163.94, 161.50, 158.26, 150.20, 139.47, 134.40, 131.98, 131.19, 131.11, 130.07, 129.34, 129.31, 128.79, 127.99, 127.36, 120.92, 119.16, 117.34, 115.97, 115.76, 104.82; **Anal. Calc. For C<sub>25</sub>H<sub>17</sub>BrFN<sub>5</sub>S:** C, 57.92; H, 3.31; N, 13.51. **Found:** C, 57.87; H, 3.26; N, 13.44.

**1-((3-(4-Fluorophenyl)-1-phenyl-1H-pyrazole-4-yl)methylene)-2-(4-(4-chlorophenyl)thiazol-2-yl)hydrazine (4k)**

**Yield:** 86%; **M.pt:** 215-218°C; **IR** ( $\nu_{max}$   $\text{cm}^{-1}$ , **KBr**): 3454 (NH Stretch), 1560 (C=N Stretch), 1500 (C=C Stretch); **<sup>1</sup>H-NMR (400 MHz,  $\delta$  (ppm) DMSO-*d*<sub>6</sub>):** 11.97 (s, 1H, NH), 8.90 (s, 1H, -CH=N), 8.16 (s, 1H, pyrazole-H<sub>5</sub>), 7.99 (d,  $J$  = 7.7 Hz, 2H, H<sub>7</sub>/H<sub>11</sub>), 7.89-7.85 (m, 4H, H<sub>13</sub>/H<sub>17</sub>, H<sub>27</sub>/H<sub>31</sub>), 7.58-7.54 (m, 2H, H<sub>8</sub>/H<sub>10</sub>), 7.47 (d,  $J$  = 8.6 Hz, 2H, H<sub>28</sub>/H<sub>30</sub>), 7.40-7.35 (m, 4H, H<sub>14</sub>/H<sub>16</sub>, H<sub>9</sub>, thiazole-H<sub>23</sub>); **<sup>13</sup>C-NMR (100 MHz,  $\delta$  (ppm) DMSO-*d*<sub>6</sub>):** 168.57, 161.50, 151.68, 150.20, 149.71, 139.47, 135.17, 134.06, 132.34, 131.20, 131.11, 130.07, 129.07, 128.79, 127.67, 127.37, 119.16, 117.34, 115.97, 115.76, 104.75; **Anal. Calc. For C<sub>25</sub>H<sub>17</sub>ClFN<sub>5</sub>S:** C, 63.36; H, 3.62; N, 14.78. **Found:** C, 63.31; H, 3.57; N, 14.73.

**1-((3-(4-Fluorophenyl)-1-phenyl-1H-pyrazole-4-yl)methylene)-2-(4-(4-nitrophenyl)thiazol-2-yl)hydrazine (4l)**

**Yield:** 78%; **M.pt:** 258.4-260°C; **IR** ( $\nu_{max}$   $\text{cm}^{-1}$ , **KBr**): 3454 (NH Stretch), 1585 (C=N Stretch), 1510, 1344 (NO<sub>2</sub> Stretch); **<sup>1</sup>H-NMR (400 MHz,  $\delta$  (ppm) DMSO-*d*<sub>6</sub>):** 12.08 (s, 1H, NH), 8.92 (s, 1H, -CH=N), 8.28 (d,  $J$  = 8.9 Hz, 2H, H<sub>28</sub>/H<sub>30</sub>), 8.17 (s, 1H, pyrazole-H<sub>5</sub>), 8.10 (d,  $J$  = 8.9 Hz, 2H, H<sub>27</sub>/H<sub>31</sub>), 7.98 (d,  $J$  = 7.8 Hz, 2H, H<sub>7</sub>/H<sub>11</sub>), 7.90-7.85 (m, 2H, H<sub>13</sub>/H<sub>17</sub>), 7.69 (s, 1H, thiazole-H<sub>23</sub>), 7.56 (t,  $J$  = 7.9 Hz, 1H, H<sub>8</sub>/H<sub>10</sub>), 7.41-7.35 (m, 3H, H<sub>14</sub>/H<sub>16</sub>, H<sub>9</sub>); **<sup>13</sup>C-NMR (100 MHz,  $\delta$  (ppm) DMSO-*d*<sub>6</sub>):** 168.87, 150.25, 148.92, 146.67, 141.18, 139.46, 135.94, 135.56, 131.21, 131.12, 130.07, 129.33, 128.90, 127.39, 126.79, 124.57, 119.17, 117.26, 115.98, 115.77, 108.86; **Anal. Calc. For C<sub>25</sub>H<sub>17</sub>FN<sub>6</sub>O<sub>2</sub>S:** C, 61.98; H, 3.54; N, 17.35. **Found:** C, 61.94; H, 3.48; N, 17.29.

**1-((3-(4-Chlorophenyl)-1-phenyl-1H-pyrazole-4-yl)methylene)-2-(4-(4-bromophenyl)thiazol-2-yl)hydrazine (4m)**

**Yield:** 71%; **M.pt:** 223-225°C (Lit. M.pt(Alegaon et al. 2017): 248-250°C); **IR** ( $\nu_{max}$   $cm^{-1}$ , **KBr**): 3421 (NH Stretch), 1570 (C=N Stretch), 1500 (C=C Stretch); **<sup>1</sup>H-NMR (400 MHz,  $\delta$  (ppm) DMSO-*d*<sub>6</sub>):** 12.01 (s, 1H, NH), 8.91 (s, 1H, -CH=N), 8.16 (s, 1H, pyrazole-H<sub>5</sub>), 7.98 (d, *J* = 7.5 Hz, 2H, H<sub>7</sub>/H<sub>11</sub>), 7.87 (d, *J* = 8.5 Hz, 2H, H<sub>27</sub>/H<sub>31</sub>), 7.80 (d, *J* = 8.5 Hz, 2H, H<sub>28</sub>/H<sub>30</sub>), 7.61-7.53 (m, 6H, H<sub>13</sub>/H<sub>17</sub>, H<sub>14</sub>/H<sub>16</sub>, H<sub>8</sub>/H<sub>10</sub>), 7.40-7.36 (m, 2H, H<sub>9</sub>, thiazole-H<sub>23</sub>); **<sup>13</sup>C-NMR (100 MHz,  $\delta$  (ppm) DMSO-*d*<sub>6</sub>):** 168.02, 149.34, 138.89, 134.55, 133.85, 133.14, 131.48, 131.19, 130.23, 129.58, 129.14, 128.54, 128.48, 127.47, 126.94, 120.42, 118.66, 116.95, 104.35; **Anal. Calc. For C<sub>25</sub>H<sub>17</sub>BrClN<sub>5</sub>S:** C, 56.14; H, 3.20; N, 13.09. **Found:** C, 56.09; H, 3.15; N, 13.03.

**1-((3-(4-Chlorophenyl)-1-phenyl-1*H*-pyrazole-4-yl)methylene)-2-(4-(4-chlorophenyl)thiazol-2-yl)hydrazine (4n)**

**Yield:** 82%; **M.pt:** 234-235°C (Lit. M.pt(Alegaon et al. 2017): 183-185°C); **IR** ( $\nu_{max}$   $cm^{-1}$ , **KBr**): 3439 (NH Stretch), 1581 (C=N Stretch), 1494 (C=C Stretch); **<sup>1</sup>H-NMR (400 MHz,  $\delta$  (ppm) DMSO-*d*<sub>6</sub>):** 12.01 (s, 1H, NH), 8.91 (s, 1H, -CH=N), 8.16 (s, 1H, pyrazole-H<sub>5</sub>), 7.98 (d, *J* = 7.7 Hz, 2H, H<sub>7</sub>/H<sub>11</sub>), 7.88-7.85 (m, 4H, H<sub>13</sub>/H<sub>17</sub>, H<sub>27</sub>/H<sub>31</sub>), 7.60-7.53 (m, 4H, H<sub>28</sub>/H<sub>30</sub>, H<sub>8</sub>/H<sub>10</sub>), 7.46 (d, *J* = 8.6 Hz, 2H, H<sub>14</sub>/H<sub>16</sub>), 7.40-7.36 (m, 2H, H<sub>9</sub>, thiazole-H<sub>23</sub>); **<sup>13</sup>C-NMR (100 MHz,  $\delta$  (ppm) DMSO-*d*<sub>6</sub>):** 168.03, 149.33, 149.16, 138.89, 134.54, 133.51, 133.14, 131.83, 131.19, 130.23, 129.58, 128.57, 128.54, 128.48, 127.16, 126.93, 118.66, 116.96, 104.25; **Anal. Calc. For C<sub>25</sub>H<sub>17</sub>Cl<sub>2</sub>N<sub>5</sub>S:** C, 61.23; H, 3.49; N, 14.28; **Found:** C, 61.18; H, 3.43; N, 14.24.

**1-((3-(4-Chlorophenyl)-1-phenyl-1*H*-pyrazole-4-yl)methylene)-2-(4-(4-nitrophenyl)thiazol-2-yl)hydrazine (4o)**

**Yield:** 83%; **M.pt:** 265.8-266.4°C (Lit. M.pt(Alegaon et al. 2017): 249-251°C); **IR** ( $\nu_{max}$   $cm^{-1}$ , **KBr**): 3433 (NH Stretch), 1591 (C=N Stretch), 1504, 1342 (NO<sub>2</sub> Stretch); **<sup>1</sup>H-NMR (400 MHz,  $\delta$  (ppm) DMSO-*d*<sub>6</sub>):** 12.10 (s, 1H, NH), 8.93 (s, 1H, -CH=N), 8.28 (d, *J* = 9.0 Hz, 2H, H<sub>28</sub>/H<sub>30</sub>), 8.18 (s, 1H, pyrazole-H<sub>5</sub>), 8.10 (d, *J* = 8.9 Hz, 2H, H<sub>27</sub>/H<sub>31</sub>), 7.98 (d, *J* = 7.7 Hz, 2H, H<sub>7</sub>/H<sub>11</sub>), 7.88 (d, *J* = 8.5 Hz, 2H, H<sub>13</sub>/H<sub>17</sub>), 7.70 (s, 1H, thiazole-H<sub>23</sub>), 7.60 (d, *J* = 8.5 Hz, 2H, H<sub>14</sub>/H<sub>16</sub>), 7.58-7.54 (m, 2H, H<sub>8</sub>/H<sub>10</sub>), 7.41-7.37 (t, *J* = 7.4 Hz, 1H, H<sub>9</sub>); **<sup>13</sup>C-NMR (100 MHz,  $\delta$  (ppm) DMSO-*d*<sub>6</sub>):** 168.83, 149.90, 148.93, 146.67, 141.17, 139.42, 135.46, 133.67, 131.71, 130.74, 130.09, 129.17, 128.99, 127.46, 126.78, 124.57, 119.20, 117.39, 108.89; **Anal. Calc. For C<sub>25</sub>H<sub>17</sub>ClN<sub>6</sub>O<sub>2</sub>S:** C, 59.94; H, 3.42; N, 16.78. **Found:** C, 59.88; H, 3.38; N, 16.71.

**((1,3-Diphenyl-1*H*-pyrazol-4-yl)methylene)-2-(4-(4-bromophenyl)thiazol-2-yl)hydrazine (4p)**

**Yield:** 81%; **M.pt:** 214.7-215.6°C; **IR** ( $\nu_{max}$   $cm^{-1}$ , **KBr**): 3300 (NH Stretch), 1566 (C=N Stretch), 1548 (C=C Stretch); **<sup>1</sup>H-NMR (500 MHz,  $\delta$  (ppm) DMSO-*d*<sub>6</sub>):** 11.99 (s, 1H, NH), 8.90 (s, 1H, -CH=N), 8.18 (s, 1H, pyrazole-H<sub>5</sub>), 8.00 (d, *J* = 7.7 Hz, 2H, H<sub>7</sub>/H<sub>11</sub>), 7.83-7.79 (m, 4H, H<sub>27</sub>/H<sub>31</sub>, H<sub>13</sub>/H<sub>17</sub>), 7.60 (d, *J* = 8.6 Hz, 2H, H<sub>28</sub>/H<sub>30</sub>), 7.57-7.53 (m, 4H, H<sub>14</sub>/H<sub>16</sub>, H<sub>8</sub>/H<sub>10</sub>), 7.50-7.46 (m, 1H, H<sub>15</sub>), 7.39-7.36 (m, 2H, H<sub>9</sub>, thiazole-H<sub>23</sub>); **<sup>13</sup>C-NMR (125 MHz,  $\delta$  (ppm) DMSO-*d*<sub>6</sub>):** 168.56, 151.45, 151.30, 149.74, 139.52, 135.28, 134.38, 132.74, 131.98, 130.06, 129.03, 128.95, 128.15, 127.98, 127.33, 120.92, 119.17, 117.40, 104.79; **Anal. Calc. For C<sub>25</sub>H<sub>18</sub>BrN<sub>5</sub>S:** C, 60.00; H, 3.63; N, 14.00. **Found:** C, 59.95; H, 3.59; N, 13.93.

**((1,3-Diphenyl-1*H*-pyrazol-4-yl)methylene)-2-(4-(4-chlorophenyl)thiazol-2-yl)hydrazine (4q)**

**Yield:** 82%; **M.pt:** 210-212°C; **IR** ( $\nu_{max}$   $cm^{-1}$ , **KBr**): 3307 (NH Stretch), 2920 (CH Stretch), 1597 (C=N Stretch), 1543 (C=C Stretch); **<sup>1</sup>H-NMR (400 MHz,  $\delta$  (ppm) DMSO-*d*<sub>6</sub>):** 11.97 (s, 1H, NH), 8.89 (s, 1H, -CH=N), 8.19 (s, 1H, pyrazole-H<sub>5</sub>), 8.00 (d, *J* = 7.9 Hz, 2H, H<sub>7</sub>/H<sub>11</sub>), 7.87 (d, *J* = 8.5 Hz, 2H, H<sub>27</sub>/H<sub>31</sub>), 7.80 (d, *J* = 7.1 Hz, 2H, H<sub>13</sub>/H<sub>17</sub>), 7.58-7.53 (m, 4H, H<sub>28</sub>/H<sub>30</sub>, H<sub>14</sub>/H<sub>16</sub>), 7.50-7.45 (m, 3H, H<sub>8</sub>/H<sub>10</sub>, H<sub>9</sub>), 7.41-7.37 (m, 2H, H<sub>15</sub>, thiazole-H<sub>23</sub>); **<sup>13</sup>C-NMR (100 MHz,  $\delta$  (ppm) DMSO-*d*<sub>6</sub>):** 168.57, 151.31, 149.70, 139.53, 135.30, 134.81, 134.06, 132.76, 132.33, 130.05, 129.06, 129.02, 128.95, 128.15, 127.67, 127.33, 119.19, 117.42, 104.70. **Anal. Calc. For C<sub>25</sub>H<sub>18</sub>ClN<sub>5</sub>S:** C, 65.85; H, 3.98; N, 15.36. **Found:** C, 65.79; H, 3.92; N, 15.32.

**((1,3-Diphenyl-1*H*-pyrazol-4-yl)methylene)-2-(4-(4-nitrophenyl)thiazol-2-yl) (4r)**

**Yield:** 87%; **M.pt:** 239-241°C; **IR** ( $\nu_{max}$   $cm^{-1}$ , **KBr**): 3370 (NH Stretch), 2910 (C-H Stretch), 1611 (C=N Stretch), 1509, 1343 (NO<sub>2</sub> Stretch); **<sup>1</sup>H-NMR (400 MHz,  $\delta$  (ppm) DMSO-*d*<sub>6</sub>):** 12.08 (s, 1H, NH), 8.91 (s, 1H, -CH=N), 8.28 (d, *J* = 8.9 Hz, 2H, H<sub>28</sub>/H<sub>30</sub>), 8.20 (s, 1H, pyrazole-H<sub>5</sub>), 8.11 (d, *J* = 8.9 Hz, 2H, H<sub>27</sub>/H<sub>31</sub>), 8.00 (d, *J* = 7.8 Hz, 2H, H<sub>7</sub>/H<sub>11</sub>), 7.80 (d, *J* = 7.0 Hz, 2H, H<sub>13</sub>/H<sub>17</sub>), 7.71 (s, 1H, thiazole-H<sub>23</sub>), 7.58-7.47 (m, 5H, H<sub>14</sub>/H<sub>16</sub>, H<sub>8</sub>/H<sub>10</sub>, H<sub>9</sub>), 7.41-7.37 (m, 1H, H<sub>15</sub>); **<sup>13</sup>C-NMR (100 MHz,  $\delta$  (ppm) DMSO-*d*<sub>6</sub>):** 168.87, 167.94, 151.36, 148.93, 146.67, 141.19, 139.52, 135.69, 132.73, 130.07, 129.04, 128.97, 128.27, 127.37, 126.79, 124.58, 119.21, 117.33, 108.85; **Anal. Calc. For C<sub>25</sub>H<sub>18</sub>N<sub>6</sub>O<sub>2</sub>S:** C, 64.37; H, 3.89; N, 18.01. **Found:** C, 64.28; H, 3.82; N, 17.95.

**Table S 1: Percentage of identity of splits 1–4.**

| Split   | SET                | Split 1(%) | Split 2(%) | Split 3(%) | Split 4(%) |
|---------|--------------------|------------|------------|------------|------------|
| Split 1 | Total              | 100        | 0.0        | 0.0        | 0.0        |
|         | Training           | 100        | 0.0        | 0.0        | 0.0        |
|         | Invisible training | 100        | 0.0        | 0.0        | 0.0        |
|         | Calibration        | 100        | 0.0        | 0.0        | 0.0        |
|         | Validation         | 100        | 0.0        | 0.0        | 0.0        |
| Split 2 | Total              |            | 100        | 0.0        | 0.0        |
|         | Training           |            | 100        | 0.0        | 0.0        |
|         | Invisible training |            | 100        | 0.0        | 0.0        |
|         | Calibration        |            | 100        | 0.0        | 0.0        |
|         | Validation         |            | 100        | 0.0        | 0.0        |
| Split 3 | Total              |            |            | 100        | 3.7        |
|         | Training           |            |            | 100        | 7.4        |
|         | Invisible training |            |            | 100        | 0.0        |
|         | Calibration        |            |            | 100        | 6.9        |
|         | Validation         |            |            | 100        | 0.0        |
| Split 4 | Total              |            |            |            | 100        |
|         | Training           |            |            |            | 100        |
|         | Invisible training |            |            |            | 100        |
|         | Calibration        |            |            |            | 100        |
|         | Validation         |            |            |            | 100        |

$$\text{Identity (\%)} = [N_{ij}/0.5(N_i+N_j)] \times 100$$

Where:

$N_{ij}$  is the number of substances which are distributed into the same set for both i-th split and j-th split (set = training set, invisible training set, calibration set, validation set)

$N_i$  is the number of substances which are distributed into the set for i-th split

$N_j$  is the number of substances which are distributed into the set for j-th split

**Table S 2: Details of statistical outcomes by using IIC.**

| Split |   |   |   | Compound | ID for different concentration | SMILES                                                                                | Expt % inhibition | Calc % inhibition |         |         |         | Expt-Calc |         |          |         | Applicability |         |         |           |
|-------|---|---|---|----------|--------------------------------|---------------------------------------------------------------------------------------|-------------------|-------------------|---------|---------|---------|-----------|---------|----------|---------|---------------|---------|---------|-----------|
| 1     | 2 | 3 | 4 |          |                                |                                                                                       |                   | Split 1           | Split 2 | Split 3 | Split 4 | Split 1   | Split 2 | Split 3  | Split 4 | Split 1       | Split 2 | Split 3 | Split 4   |
| +     | - | # | * | 4a       | TCPH01                         | <chem>Brc1ccc(cc1)-c1csc(N\N=C\c2cn(nc2-c2ccc(Br)cc2)-c2ccccc2)n1\$</chem>            | 82.7200           | 80.3973           | 85.9843 | 87.4776 | 83.5057 | 2.3227    | -3.2643 | -4.7576  | -0.7857 | YES           | YES     | YES     | YES       |
| -     | + | * | # | 4b       | TCPH02                         | <chem>Clc1ccc(cc1)-c1csc(N\N=C\c2cn(nc2-c2ccc(Br)cc2)-c2ccccc2)n1\$</chem>            | 80.3300           | 84.0411           | 81.5449 | 86.4629 | 81.9629 | -3.7111   | -1.2149 | -6.1329  | -1.6329 | YES           | YES     | YES     | YES       |
| #     | * | - | + | 4c       | TCPH03                         | <chem>[O-][N+](=O)c1ccc(cc1)-c1csc(N\N=C\c2cn(nc2-c2ccc(Br)cc2)-c2ccccc2)n1\$~</chem> | 82.9000           | 82.8377           | 86.3826 | 83.1111 | 85.3661 | 0.0623    | -3.4826 | -0.2111  | -2.4661 | YES           | YES     | YES     | YES       |
| *     | # | + | + | 4d       | TCPH04                         | <chem>COc1ccc(cc1)-c1nn(cc1\C=N\Nc1nc(cs1)-c1ccc(Br)cc1)-c1ccccc1\$</chem>            | 79.0400           | 85.2571           | 84.8946 | 87.5607 | 82.9479 | -6.2171   | -5.8546 | -8.5207  | -3.9079 | YES           | YES     | YES     | YES       |
| +     | - | # | * | 4e       | TCPH05                         | <chem>COc1ccc(cc1)-c1nn(cc1\C=N\Nc1nc(cs1)-c1ccc(Cl)cc1)-c1ccccc1\$</chem>            | 82.1700           | 85.3417           | 86.7923 | 87.2476 | 82.9358 | -3.1717   | -4.6223 | -5.0776  | -0.7658 | YES           | YES     | YES     | YES       |
| -     | + | * | # | 4f       | TCPH06                         | <chem>COc1ccc(cc1)-c1nn(cc1\C=N\Nc1nc(cs1)-c1ccc(cc1)[N+](O-)=O)-c1ccccc1\$~</chem>   | 77.9400           | 74.8375           | 75.5110 | 81.2405 | 70.8667 | 3.1025    | 2.4290  | -3.3005  | 7.0733  | YES           | YES     | YES     | YES       |
| #     | * | - | + | 4g       | TCPH07                         | <chem>Cc1ccc(cc1)-c1nn(cc1\C=N\Nc1nc(cs1)-c1ccc(Br)cc1)-c1ccccc1\$</chem>             | 89.1500           | 83.2757           | 86.7237 | 86.6281 | 80.4886 | 5.8743    | 2.4263  | 2.5219   | 8.6614  | YES           | YES     | YES     | YES       |
| *     | # | + | - | 4h       | TCPH08                         | <chem>Cc1ccc(cc1)-c1nn(cc1\C=N\Nc1nc(cs1)-c1ccc(Cl)cc1)-c1ccccc1\$</chem>             | 88.4200           | 83.3602           | 88.6214 | 86.3150 | 80.4765 | 5.0598    | -0.2014 | 2.1050   | 7.9435  | YES           | YES     | YES     | YES       |
| +     | - | # | * | 4i       | TCPH09                         | <chem>Cc1ccc(cc1)-c1nn(cc1\C=N\Nc1nc(cs1)-c1ccc(cc1)[N+](O-)=O)-c1ccccc1\$</chem>     | 79.9600           | 74.6614           | 76.8717 | 81.2039 | 69.1598 | 5.2986    | 3.0883  | -1.2439  | 10.8002 | YES           | YES     | YES     | YES       |
| -     | + | * | # | 4j       | TCPH10                         | <chem>Fe1ccc(cc1)-c1nn(cc1\C=N\Nc1nc(cs1)-c1ccc(Br)cc1)-c1ccccc1\$</chem>             | 81.2500           | 83.0308           | 81.3814 | 85.5845 | 78.1591 | -1.7808   | -0.1314 | -4.3345  | 3.0909  | YES           | YES     | YES     | YES       |
| #     | * | - | + | 4k       | TCPH11                         | <chem>Fe1ccc(cc1)-c1nn(cc1\C=N\Nc1nc(cs1)-c1ccc(Cl)cc1)-c1ccccc1\$</chem>             | 77.2100           | 82.9798           | 84.7686 | 86.2406 | 78.1285 | -5.7698   | -7.5586 | -9.0306  | -0.9185 | YES           | YES     | YES     | <b>NO</b> |
| *     | # | + | - | 4l       | TCPH12                         | <chem>[O-][N+](=O)c1ccc(cc1)-c1csc(N\N=C\c2cn(nc2-c2ccc(F)cc2)-c2ccccc2)n1\$</chem>   | 86.0300           | 82.1081           | 86.2920 | 83.6930 | 78.2312 | 3.9219    | -0.2620 | 2.3370   | 7.7988  | YES           | YES     | YES     | YES       |
| +     | - | # | * | 4m       | TCPH13                         | <chem>Clc1ccc(cc1)-c1nn(cc1\C=N\Nc1nc(cs1)-c1ccc(Br)cc1)-c1ccccc1\$</chem>            | 83.8200           | 86.8886           | 85.2384 | 84.6894 | 82.0576 | -3.0686   | -1.4184 | -0.8694  | 1.7624  | YES           | YES     | YES     | YES       |
| -     | + | * | # | 4n       | TCPH14                         | <chem>Clc1ccc(cc1)-c1csc(N\N=C\c2cn(nc2-c2ccc(Cl)cc2)-c2ccccc2)n1\$</chem>            | 84.7400           | 80.4946           | 84.9270 | 87.1191 | 82.7089 | 4.2454    | -0.1870 | -2.3791  | 2.0311  | YES           | YES     | YES     | YES       |
| #     | * | - | + | 4o       | TCPH15                         | <chem>[O-][N+](=O)c1ccc(cc1)-c1csc(N\N=C\c2cn(nc2-c2ccc(Cl)cc2)-c2ccccc2)n1\$</chem>  | 81.9900           | 82.9222           | 88.2803 | 82.7980 | 85.3540 | -0.9322   | -6.2903 | -0.8080  | -3.3640 | YES           | YES     | YES     | YES       |
| *     | # | + | - | 4p       | TCPH16                         | <chem>Brc1ccc(cc1)-c1csc(N\N=C\c2cn(nc2-c2ccccc2)-c2ccccc2)n1\$</chem>                | 85.1800           | 75.6016           | 74.9436 | 82.2290 | 76.9287 | 9.5784    | 10.2364 | 2.9510   | 8.2513  | YES           | YES     | YES     | YES       |
| +     | - | # | * | 4q       | TCPH17                         | <chem>Clc1ccc(cc1)-c1csc(N\N=C\c2cn(nc2-c2ccccc2)-c2ccccc2)n1\$</chem>                | 70.0400           | 75.7499           | 72.4322 | 81.2143 | 76.2013 | -5.7099   | -2.3922 | -11.1743 | -6.1613 | YES           | YES     | YES     | YES       |
| -     | + | * | # | 4r       | TCPH18                         | <chem>[O-][N+](=O)c1ccc(cc1)-c1csc(N\N=C\c2cn(nc2-c2ccccc2)-c2ccccc2)n1\$</chem>      | 78.1300           | 78.0231           | 75.7951 | 76.8932 | 75.7489 | 0.1069    | 2.3349  | 1.2368   | 2.3811  | YES           | YES     | YES     | YES       |
| #     | * | - | + | 4a       | TCPH19                         | <chem>Brc1ccc(cc1)-c1csc(N\N=C\c2cn(nc2-c2ccc(Br)cc2)-c2ccccc2)n1%</chem>             | 61.2100           | 65.9414           | 69.9739 | 69.6469 | 68.1737 | -4.7314   | -8.7639 | -8.4369  | -6.9637 | YES           | YES     | YES     | YES       |
| *     | # | + | - | 4b       | TCPH20                         | <chem>Clc1ccc(cc1)-c1csc(N\N=C\c2cn(nc2-c2ccc(Br)cc2)-c2ccccc2)n1%</chem>             | 68.3800           | 69.5853           | 65.5345 | 68.6323 | 66.6309 | -1.2053   | 2.8455  | -0.2523  | 1.7491  | YES           | YES     | YES     | YES       |
| +     | - | # | * | 4c       | TCPH21                         | <chem>[O-][N+](=O)c1ccc(cc1)-c1csc(N\N=C\c2cn(nc2-c2ccc(Br)cc2)-c2ccccc2)n1%</chem>   | 71.5100           | 68.3818           | 70.3722 | 65.2804 | 70.0342 | 3.1282    | 1.1378  | 6.2296   | 1.4758  | YES           | YES     | YES     | YES       |
| -     | + | * | # | 4d       | TCPH22                         | <chem>COc1ccc(cc1)-c1nn(cc1\C=N\Nc1nc(cs1)-</chem>                                    | 67.4600           | 70.9963           | 69.3704 | 69.7300 | 71.4846 | -3.5363   | -1.9104 | -2.2700  | -4.0246 | YES           | YES     | YES     | YES       |



|   |   |   |   |    |        |                                                                                         |         |         |         |         |         |         |          |          |          |     |     |     |     |
|---|---|---|---|----|--------|-----------------------------------------------------------------------------------------|---------|---------|---------|---------|---------|---------|----------|----------|----------|-----|-----|-----|-----|
|   |   |   |   |    |        | <chem>c1ccc(Cl)cc1)-c1ccccc1&amp;</chem>                                                |         |         |         |         |         |         |          |          |          |     |     |     |     |
| * | # | + | - | 4l | TCPH48 | <chem>[O-][N+](=O)c1ccc(cc1)-c1csc(N\N=C\c2cn(nc2-c2ccc(F)cc2)-c2ccccc2)n1&amp;</chem>  | 55.3300 | 55.1795 | 64.9269 | 57.4625 | 54.3677 | 0.1505  | -9.5969  | -2.1325  | 0.9623   | YES | YES | YES | YES |
| + | - | # | * | 4m | TCPH49 | <chem>Clc1ccc(cc1)-c1nn(cc1\C=N\Nc1nc(cs1)-c1ccc(Br)cc1)-c1ccccc1&amp;</chem>           | 67.2800 | 63.6209 | 65.3403 | 58.4589 | 63.5368 | 3.6591  | 1.9397   | 8.8211   | 3.7432   | YES | YES | YES | YES |
| - | + | * | # | 4n | TCPH50 | <chem>Clc1ccc(cc1)-c1csc(N\N=C\c2cn(nc2-c2ccc(Cl)cc2)-c2ccccc2)n1&amp;</chem>           | 68.8700 | 53.5660 | 63.5619 | 60.8886 | 58.8454 | 15.3040 | 5.3081   | 7.9814   | 10.0246  | YES | YES | YES | YES |
| # | * | - | + | 4o | TCPH51 | <chem>[O-][N+](=O)c1ccc(cc1)-c1csc(N\N=C\c2cn(nc2-c2ccc(Cl)cc2)-c2ccccc2)n1&amp;</chem> | 56.0700 | 55.9937 | 66.9152 | 56.5675 | 61.4905 | 0.0763  | -10.8452 | -0.4975  | -5.4205  | YES | YES | YES | YES |
| * | # | + | - | 4p | TCPH52 | <chem>BrC1ccc(cc1)-c1csc(N\N=C\c2cn(nc2-c2ccccc2)-c2ccccc2)n1&amp;</chem>               | 52.3900 | 48.6730 | 53.5785 | 55.9985 | 53.0652 | 3.7170  | -1.1885  | -3.6085  | -0.6752  | YES | YES | YES | YES |
| + | - | # | # | 4q | TCPH53 | <chem>Clc1ccc(cc1)-c1csc(N\N=C\c2cn(nc2-c2ccccc2)-c2ccccc2)n1&amp;</chem>               | 40.9900 | 48.8213 | 51.0671 | 54.9838 | 52.3377 | -7.8313 | -10.0771 | -13.9938 | -11.3477 | YES | YES | YES | YES |
| - | + | * | # | 4r | TCPH54 | <chem>[O-][N+](=O)c1ccc(cc1)-c1csc(N\N=C\c2cn(nc2-c2ccccc2)-c2ccccc2)n1&amp;</chem>     | 52.9400 | 51.0945 | 54.4301 | 50.6627 | 51.8854 | 1.8455  | -1.4901  | 2.2773   | 1.0546   | YES | YES | YES | YES |



**Table S 3: Details of statistical outcomes without IIC**

| Split |   |   |   | Compound | ID for different concentration | SMILES                                                                                | Expt % inhibition | Calc % inhibition |         |         |         | Expt-Calc |          |         |          | Applicability |         |         |           |
|-------|---|---|---|----------|--------------------------------|---------------------------------------------------------------------------------------|-------------------|-------------------|---------|---------|---------|-----------|----------|---------|----------|---------------|---------|---------|-----------|
| 1     | 2 | 3 | 4 |          |                                |                                                                                       |                   | Split 1           | Split 2 | Split 3 | Split 4 | Split 1   | Split 2  | Split 3 | Split 4  | Split 1       | Split 2 | Split 3 | Split 4   |
| +     | - | # | * | 4a       | TCPH01                         | <chem>Brc1ccc(cc1)-c1csc(N\N=C\c2cn(nc2-c2ccc(Br)cc2)-c2ccccc2)n1\$</chem>            | 82.7200           | 83.3162           | 86.9254 | 84.3608 | 84.9704 | -0.5962   | -4.2054  | -1.6408 | -2.2504  | YES           | YES     | YES     | YES       |
| -     | + | * | # | 4b       | TCPH02                         | <chem>Clc1ccc(cc1)-c1csc(N\N=C\c2cn(nc2-c2ccc(Br)cc2)-c2ccccc2)n1\$</chem>            | 80.3300           | 82.6811           | 83.5198 | 87.1583 | 90.6121 | -2.3511   | -3.1898  | -6.8283 | -10.2821 | YES           | YES     | YES     | YES       |
| #     | * | - | + | 4c       | TCPH03                         | <chem>[O-][N+](=O)c1ccc(cc1)-c1csc(N\N=C\c2cn(nc2-c2ccc(Br)cc2)-c2ccccc2)n1\$~</chem> | 82.9000           | 85.6566           | 89.7685 | 87.6546 | 84.4887 | -2.7566   | -6.8685  | -4.7546 | -1.5887  | YES           | YES     | YES     | YES       |
| *     | # | + | + | 4d       | TCPH04                         | <chem>COc1ccc(cc1)-c1nn(cc1\C=N\Nc1nc(cs1)-c1ccc(Br)cc1)-c1ccccc1\$</chem>            | 79.0400           | 85.7344           | 90.5941 | 87.8280 | 82.3092 | -6.6944   | -11.5541 | -8.7880 | -3.2692  | YES           | YES     | YES     | YES       |
| +     | - | # | * | 4e       | TCPH05                         | <chem>COc1ccc(cc1)-c1nn(cc1\C=N\Nc1nc(cs1)-c1ccc(Cl)cc1)-c1ccccc1\$</chem>            | 82.1700           | 87.5803           | 88.8403 | 85.5019 | 82.2821 | -5.4103   | -6.6703  | -3.3319 | -0.1121  | YES           | YES     | YES     | YES       |
| -     | + | * | # | 4f       | TCPH06                         | <chem>COc1ccc(cc1)-c1nn(cc1\C=N\Nc1nc(cs1)-c1ccc(cc1)[N+](O-)=O)-c1ccccc1\$~</chem>   | 77.9400           | 74.1167           | 75.8866 | 75.7363 | 70.6417 | 3.8233    | 2.0534   | 2.2037  | 7.2983   | YES           | YES     | YES     | YES       |
| #     | * | - | + | 4g       | TCPH07                         | <chem>Cc1ccc(cc1)-c1nn(cc1\C=N\Nc1nc(cs1)-c1ccc(Br)cc1)-c1ccccc1\$</chem>             | 89.1500           | 88.6285           | 92.4363 | 89.1927 | 84.7200 | 0.5215    | -3.2863  | -0.0427 | 4.4300   | YES           | YES     | YES     | YES       |
| *     | # | + | - | 4h       | TCPH08                         | <chem>Cc1ccc(cc1)-c1nn(cc1\C=N\Nc1nc(cs1)-c1ccc(Cl)cc1)-c1ccccc1\$</chem>             | 88.4200           | 90.4745           | 90.6824 | 86.8666 | 84.6930 | -2.0545   | -2.2624  | 1.5534  | 3.7270   | YES           | YES     | YES     | YES       |
| +     | - | # | * | 4i       | TCPH09                         | <chem>Cc1ccc(cc1)-c1nn(cc1\C=N\Nc1nc(cs1)-c1ccc(cc1)[N+](O-)=O)-c1ccccc1\$</chem>     | 79.9600           | 76.4410           | 81.1618 | 75.6813 | 70.6222 | 3.5190    | -1.2018  | 4.2787  | 9.3378   | YES           | YES     | YES     | YES       |
| -     | + | * | # | 4j       | TCPH10                         | <chem>Fc1ccc(cc1)-c1nn(cc1\C=N\Nc1nc(cs1)-c1ccc(Br)cc1)-c1ccccc1\$</chem>             | 81.2500           | 77.6634           | 78.4969 | 86.3616 | 79.8238 | 3.5866    | 2.7531   | -5.1116 | 1.4262   | YES           | YES     | YES     | YES       |
| #     | * | - | + | 4k       | TCPH11                         | <chem>Fc1ccc(cc1)-c1nn(cc1\C=N\Nc1nc(cs1)-c1ccc(Cl)cc1)-c1ccccc1\$</chem>             | 77.2100           | 83.1784           | 87.1322 | 86.8243 | 78.1679 | -5.9684   | -9.9222  | -9.6143 | -0.9579  | YES           | YES     | YES     | <b>NO</b> |
| *     | # | + | - | 4l       | TCPH12                         | <chem>[O-][N+](=O)c1ccc(cc1)-c1csc(N\N=C\c2cn(nc2-c2ccc(F)cc2)-c2ccccc2)n1\$</chem>   | 86.0300           | 83.0806           | 80.9623 | 80.4185 | 83.3255 | 2.9494    | 5.0677   | 5.6115  | 2.7045   | YES           | YES     | YES     | YES       |
| +     | - | # | * | 4m       | TCPH13                         | <chem>Clc1ccc(cc1)-c1nn(cc1\C=N\Nc1nc(cs1)-c1ccc(Br)cc1)-c1ccccc1\$</chem>            | 83.8200           | 84.9385           | 87.3152 | 91.2716 | 83.9002 | -1.1185   | -3.4952  | -7.4516 | -0.0802  | YES           | YES     | YES     | YES       |
| -     | + | * | # | 4n       | TCPH14                         | <chem>Clc1ccc(cc1)-c1csc(N\N=C\c2cn(nc2-c2ccc(Cl)cc2)-c2ccccc2)n1\$</chem>            | 84.7400           | 83.9362           | 85.1793 | 87.6210 | 84.0838 | 0.8038    | -0.4393  | -2.8810 | 0.6562   | YES           | YES     | YES     | YES       |
| #     | * | - | + | 4o       | TCPH15                         | <chem>[O-][N+](=O)c1ccc(cc1)-c1csc(N\N=C\c2cn(nc2-c2ccc(Cl)cc2)-c2ccccc2)n1\$</chem>  | 81.9900           | 87.5025           | 88.0147 | 85.3285 | 84.4617 | -5.5125   | -6.0247  | -3.3385 | -2.4717  | YES           | YES     | YES     | YES       |
| *     | # | + | - | 4p       | TCPH16                         | <chem>Brc1ccc(cc1)-c1csc(N\N=C\c2cn(nc2-c2ccccc2)-c2ccccc2)n1\$</chem>                | 85.1800           | 72.1797           | 76.9099 | 77.1675 | 78.0162 | 13.0003   | 8.2701   | 8.0125  | 7.1638   | YES           | YES     | YES     | YES       |
| +     | - | # | * | 4q       | TCPH17                         | <chem>Clc1ccc(cc1)-c1csc(N\N=C\c2cn(nc2-c2ccccc2)-c2ccccc2)n1\$</chem>                | 70.0400           | 69.7579           | 73.5050 | 79.9650 | 78.7956 | 0.2821    | -3.4650  | -9.9250 | -8.7556  | YES           | YES     | YES     | YES       |
| -     | + | * | # | 4r       | TCPH18                         | <chem>[O-][N+](=O)c1ccc(cc1)-c1csc(N\N=C\c2cn(nc2-c2ccccc2)-c2ccccc2)n1\$</chem>      | 78.1300           | 73.3282           | 74.5167 | 77.6725 | 79.1911 | 4.8018    | 3.6133   | 0.4575  | -1.0611  | YES           | YES     | YES     | YES       |
| #     | * | - | + | 4a       | TCPH19                         | <chem>Brc1ccc(cc1)-c1csc(N\N=C\c2cn(nc2-c2ccc(Br)cc2)-c2ccccc2)n1%</chem>             | 61.2100           | 66.3301           | 72.5343 | 68.4292 | 65.6453 | -5.1201   | -11.3243 | -7.2192 | -4.4353  | YES           | YES     | YES     | YES       |
| *     | # | + | - | 4b       | TCPH20                         | <chem>Clc1ccc(cc1)-c1csc(N\N=C\c2cn(nc2-c2ccc(Br)cc2)-c2ccccc2)n1%</chem>             | 68.3800           | 65.6950           | 69.1287 | 71.2267 | 71.2870 | 2.6850    | -0.7487  | -2.8467 | -2.9070  | YES           | YES     | YES     | YES       |
| +     | - | # | * | 4c       | TCPH21                         | <chem>[O-][N+](=O)c1ccc(cc1)-c1csc(N\N=C\c2cn(nc2-c2ccc(Br)cc2)-c2ccccc2)n1%</chem>   | 71.5100           | 68.6705           | 75.3774 | 71.7230 | 65.1637 | 2.8395    | -3.8674  | -0.2130 | 6.3463   | YES           | YES     | YES     | YES       |
| -     | + | * | # | 4d       | TCPH22                         | <chem>COc1ccc(cc1)-c1nn(cc1\C=N\Nc1nc(cs1)-c1ccc(Br)cc1)-c1ccccc1%</chem>             | 67.4600           | 66.9290           | 72.6547 | 71.8964 | 71.0791 | 0.5310    | -5.1947  | -4.4364 | -3.6191  | YES           | YES     | YES     | YES       |

|   |   |   |   |    |        |                                                                          |         |         |         |         |         |         |          |         |         |     |     |     |     |
|---|---|---|---|----|--------|--------------------------------------------------------------------------|---------|---------|---------|---------|---------|---------|----------|---------|---------|-----|-----|-----|-----|
| # | * | - | + | 4e | TCPH23 | COc1ccc(cc1)-c1nn(cc1\C=N\Nc1nc(cs1)-c1ccc(Cl)cc1)-c1ccccc1%             | 75.5500 | 68.7749 | 70.9008 | 69.5703 | 71.0521 | 6.7751  | 4.6492   | 5.9797  | 4.4979  | YES | YES | YES | YES |
| * | # | + | - | 4f | TCPH24 | COc1ccc(cc1)-c1nn(cc1\C=N\Nc1nc(cs1)-c1ccc(cc1)[N+][([O-])=O)-c1ccccc1%  | 64.7100 | 55.3113 | 57.9472 | 59.8047 | 59.4116 | 9.3987  | 6.7628   | 4.9053  | 5.2984  | YES | YES | YES | YES |
| + | - | # | * | 4g | TCPH25 | Cc1ccc(cc1)-c1nn(cc1\C=N\Nc1nc(cs1)-c1ccc(Br)cc1)-c1ccccc1%              | 72.0600 | 69.8231 | 74.4968 | 73.2611 | 73.4899 | 2.2369  | -2.4368  | -1.2011 | -1.4299 | YES | YES | YES | YES |
| - | + | * | # | 4h | TCPH26 | Cc1ccc(cc1)-c1nn(cc1\C=N\Nc1nc(cs1)-c1ccc(Cl)cc1)-c1ccccc1%              | 71.6900 | 71.6690 | 72.7430 | 70.9350 | 73.4629 | 0.0210  | -1.0530  | 0.7550  | -1.7729 | YES | YES | YES | YES |
| # | * | - | + | 4i | TCPH27 | Cc1ccc(cc1)-c1nn(cc1\C=N\Nc1nc(cs1)-c1ccc(cc1)[N+][([O-])=O)-c1ccccc1%   | 52.2100 | 57.6356 | 63.2224 | 59.7497 | 59.3921 | -5.4256 | -11.0124 | -7.5397 | -7.1821 | YES | YES | YES | YES |
| * | # | + | - | 4j | TCPH28 | Fc1ccc(cc1)-c1nn(cc1\C=N\Nc1nc(cs1)-c1ccc(Br)cc1)-c1ccccc1%              | 70.5900 | 58.8580 | 60.5575 | 70.4300 | 68.5938 | 11.7320 | 10.0325  | 0.1600  | 1.9962  | YES | YES | YES | YES |
| + | - | # | * | 4k | TCPH29 | Fc1ccc(cc1)-c1nn(cc1\C=N\Nc1nc(cs1)-c1ccc(Cl)cc1)-c1ccccc1%              | 64.7100 | 64.3730 | 69.1928 | 70.8928 | 66.9378 | 0.3370  | -4.4828  | -6.1828 | -2.2278 | YES | YES | YES | NO  |
| - | + | * | # | 4l | TCPH30 | [O-][N+](=O)c1ccc(cc1)-c1sc(N\N=C\c2cn(nc2-c2ccc(F)cc2)-c2ccccc2)n1%     | 67.8300 | 66.0945 | 66.5711 | 64.4869 | 64.0005 | 1.7355  | 1.2589   | 3.3431  | 3.8295  | YES | YES | YES | YES |
| # | * | - | + | 4m | TCPH31 | Clc1ccc(cc1)-c1nn(cc1\C=N\Nc1nc(cs1)-c1ccc(Br)cc1)-c1ccccc1%             | 76.8400 | 66.1331 | 69.3757 | 75.3400 | 72.6701 | 10.7069 | 7.4643   | 1.5000  | 4.1699  | YES | YES | YES | YES |
| * | # | + | - | 4n | TCPH32 | Clc1ccc(cc1)-c1sc(N\N=C\c2cn(nc2-c2ccc(Cl)cc2)-c2ccccc2)n1%              | 71.3200 | 66.9501 | 70.7882 | 71.6894 | 64.7587 | 4.3699  | 0.5318   | -0.3694 | 6.5613  | YES | YES | YES | YES |
| + | - | # | * | 4o | TCPH33 | [O-][N+](=O)c1ccc(cc1)-c1sc(N\N=C\c2cn(nc2-c2ccc(Cl)cc2)-c2ccccc2)n1%    | 67.1000 | 70.5164 | 73.6235 | 69.3969 | 65.1367 | -3.4164 | -6.5235  | -2.2969 | 1.9633  | YES | YES | YES | YES |
| - | + | * | # | 4p | TCPH34 | BrC1ccc(cc1)-c1sc(N\N=C\c2cn(nc2-c2ccccc2)-c2ccccc2)n1%                  | 61.4000 | 55.1936 | 62.5188 | 61.2359 | 58.6911 | 6.2064  | -1.1188  | 0.1641  | 2.7089  | YES | YES | YES | YES |
| # | * | - | + | 4q | TCPH35 | Clc1ccc(cc1)-c1sc(N\N=C\c2cn(nc2-c2ccccc2)-c2ccccc2)n1%                  | 58.8200 | 52.7718 | 59.1138 | 64.0334 | 59.4705 | 6.0482  | -0.2938  | -5.2134 | -0.6505 | YES | YES | YES | YES |
| * | # | + | - | 4r | TCPH36 | [O-][N+](=O)c1ccc(cc1)-c1sc(N\N=C\c2cn(nc2-c2ccccc2)-c2ccccc2)n1%        | 60.4800 | 56.3422 | 60.1256 | 61.7409 | 59.8661 | 4.1378  | 0.3544   | -1.2609 | 0.6139  | YES | YES | YES | YES |
| + | - | # | * | 4a | TCPH37 | BrC1ccc(cc1)-c1sc(N\N=C\c2cn(nc2-c2ccc(Br)cc2)-c2ccccc2)n1&              | 56.8000 | 57.7383 | 65.4756 | 60.2027 | 60.0081 | -0.9383 | -8.6756  | -3.4027 | -3.2081 | YES | YES | YES | YES |
| - | + | * | # | 4b | TCPH38 | Clc1ccc(cc1)-c1sc(N\N=C\c2cn(nc2-c2ccc(Br)cc2)-c2ccccc2)n1&              | 61.0300 | 57.1032 | 62.0700 | 63.0002 | 65.6498 | 3.9268  | -1.0400  | -1.9702 | -4.6198 | YES | YES | YES | YES |
| # | * | - | + | 4c | TCPH39 | [O-][N+](=O)c1ccc(cc1)-c1sc(N\N=C\c2cn(nc2-c2ccc(Br)cc2)-c2ccccc2)n1&~   | 68.5700 | 60.0787 | 68.3187 | 63.4965 | 59.5264 | 8.4913  | 0.2513   | 5.0735  | 9.0436  | YES | YES | YES | YES |
| * | # | + | - | 4d | TCPH40 | COc1ccc(cc1)-c1nn(cc1\C=N\Nc1nc(cs1)-c1ccc(Br)cc1)-c1ccccc1&             | 58.8200 | 62.6355 | 70.9803 | 63.6699 | 62.9936 | -3.8155 | -12.1603 | -4.8499 | -4.1736 | YES | YES | YES | YES |
| + | - | # | * | 4e | TCPH41 | COc1ccc(cc1)-c1nn(cc1\C=N\Nc1nc(cs1)-c1ccc(Cl)cc1)-c1ccccc1&             | 69.4900 | 64.4815 | 69.2264 | 61.3438 | 62.9666 | 5.0085  | 0.2636   | 8.1462  | 6.5234  | YES | YES | YES | YES |
| - | + | * | # | 4f | TCPH42 | COc1ccc(cc1)-c1nn(cc1\C=N\Nc1nc(cs1)-c1ccc(cc1)[N+][([O-])=O)-c1ccccc1&~ | 55.1500 | 51.0178 | 56.2728 | 51.5782 | 51.3261 | 4.1322  | -1.1228  | 3.5718  | 3.8239  | YES | YES | YES | YES |
| # | * | - | + | 4g | TCPH43 | Cc1ccc(cc1)-c1nn(cc1\C=N\Nc1nc(cs1)-c1ccc(Br)cc1)-c1ccccc1&              | 65.8100 | 65.5296 | 72.8224 | 65.0346 | 65.4044 | 0.2804  | -7.0124  | 0.7754  | 0.4056  | YES | YES | YES | YES |
| * | # | + | - | 4h | TCPH44 | Cc1ccc(cc1)-c1nn(cc1\C=N\Nc1nc(cs1)-c1ccc(Cl)cc1)-c1ccccc1&              | 62.1300 | 67.3756 | 71.0686 | 62.7084 | 65.3774 | -5.2456 | -8.9386  | -0.5784 | -3.2474 | YES | YES | YES | YES |
| + | - | # | * | 4i | TCPH45 | Cc1ccc(cc1)-c1nn(cc1\C=N\Nc1nc(cs1)-c1ccc(cc1)[N+][([O-])=O)-c1ccccc1&   | 48.3500 | 53.3421 | 61.5480 | 51.5231 | 51.3066 | -4.9921 | -13.1980 | -3.1731 | -2.9566 | YES | YES | YES | YES |
| - | + | * | # | 4j | TCPH46 | Fc1ccc(cc1)-c1nn(cc1\C=N\Nc1nc(cs1)-c1ccc(Br)cc1)-c1ccccc1&              | 57.3500 | 54.5645 | 58.8831 | 62.2035 | 60.5083 | 2.7855  | -1.5331  | -4.8535 | -3.1583 | YES | YES | YES | YES |

|   |   |   |   |    |        |                                                                        |         |         |         |         |         |             |          |          |          |     |     |     |           |
|---|---|---|---|----|--------|------------------------------------------------------------------------|---------|---------|---------|---------|---------|-------------|----------|----------|----------|-----|-----|-----|-----------|
| # | * | - | + | 4k | TCPH47 | Fc1ccc(cc1)-c1nn(cc1\C=N\Nc1nc(cs1)-c1ccc(Cl)cc1)-c1ccccc1&            | 60.2900 | 60.0795 | 67.5184 | 62.6662 | 58.8523 | 0.2105      | -7.2284  | -2.3762  | 1.4377   | YES | YES | YES | <b>NO</b> |
| * | # | + | - | 4l | TCPH48 | [O-][N+](=O)c1ccc(cc1)-c1csc(N\N=C\c2cn(nc2-c2ccc(F)cc2)-c2ccccc2)n1&  | 55.3300 | 57.5027 | 59.5125 | 56.2604 | 58.3632 | -2.1727     | -4.1825  | -0.9304  | -3.0332  | YES | YES | YES | YES       |
| + | - | # | * | 4m | TCPH49 | Clc1ccc(cc1)-c1nn(cc1\C=N\Nc1nc(cs1)-c1ccc(Br)cc1)-c1ccccc1&           | 67.2800 | 61.8396 | 67.7013 | 67.1135 | 64.5846 | 5.4404      | -0.4213  | 0.1665   | 2.6954   | YES | YES | YES | YES       |
| - | + | * | # | 4n | TCPH50 | Clc1ccc(cc1)-c1csc(N\N=C\c2cn(nc2-c2ccc(Cl)cc2)-c2ccccc2)n1&           | 68.8700 | 58.3583 | 63.7295 | 63.4629 | 59.1214 | 10.511<br>7 | 5.1405   | 5.4071   | 9.7486   | YES | YES | YES | YES       |
| # | * | - | + | 4o | TCPH51 | [O-][N+](=O)c1ccc(cc1)-c1csc(N\N=C\c2cn(nc2-c2ccc(Cl)cc2)-c2ccccc2)n1& | 56.0700 | 61.9246 | 66.5649 | 61.1704 | 59.4994 | -5.8546     | -10.4949 | -5.1004  | -3.4294  | YES | YES | YES | YES       |
| * | # | + | - | 4p | TCPH52 | BrC1ccc(cc1)-c1csc(N\N=C\c2cn(nc2-c2ccccc2)-c2ccccc2)n1&               | 52.3900 | 46.6018 | 55.4601 | 53.0094 | 53.0539 | 5.7882      | -3.0701  | -0.6194  | -0.6639  | YES | YES | YES | YES       |
| + | - | # | # | 4q | TCPH53 | Clc1ccc(cc1)-c1csc(N\N=C\c2cn(nc2-c2ccccc2)-c2ccccc2)n1&               | 40.9900 | 44.1800 | 52.0552 | 55.8069 | 53.8333 | -3.1900     | -11.0652 | -14.8169 | -12.8433 | YES | YES | YES | YES       |
| - | + | * | # | 4r | TCPH54 | [O-][N+](=O)c1ccc(cc1)-c1csc(N\N=C\c2cn(nc2-c2ccccc2)-c2ccccc2)n1&     | 52.9400 | 47.7504 | 53.0669 | 53.5144 | 54.2288 | 5.1896      | -0.1269  | -0.5744  | -1.2888  | YES | YES | YES | YES       |

**Table S 4: External prediction criteria values for developed QSAR models of calibration and validation sets. Without IIC, using equation**

| Parameters   | Calibration set |         |         |         | Validation set |         |         |         |
|--------------|-----------------|---------|---------|---------|----------------|---------|---------|---------|
|              | Split 1         | Split 2 | Split 3 | Split 4 | Split 1        | Split 2 | Split 3 | Split 4 |
| r2m(x,y):    |                 |         |         |         |                |         |         |         |
| r2           | 0.7683          | 0.6682  | 0.8008  | 0.7724  | 0.7629         | 0.7355  | 0.9088  | 0.7870  |
| r20          | 0.7641          | 0.6232  | 0.7409  | 0.7454  | 0.7626         | 0.6633  | 0.9042  | 0.7716  |
| rr20         | 0.7348          | 0.6461  | 0.8004  | 0.7666  | 0.7028         | 0.7348  | 0.8782  | 0.7772  |
| (r2-r20)/r2  | 0.0054          | 0.0674  | 0.0749  | 0.0350  | 0.0004         | 0.0982  | 0.0051  | 0.0196  |
| (r2-rr20)/r2 | 0.0435          | 0.0332  | 0.0005  | 0.0075  | 0.0787         | 0.0010  | 0.0337  | 0.0125  |
| k            | 0.9956          | 1.0075  | 1.0358  | 1.0041  | 0.9617         | 1.0609  | 1.0128  | 0.9912  |
| kk           | 0.9977          | 0.9831  | 0.9594  | 0.9887  | 1.0314         | 0.9363  | 0.9849  | 1.0045  |
| R2m(test)    | 0.7189          | 0.5264  | 0.6047  | 0.6454  | 0.7498         | 0.5378  | 0.8469  | 0.6892  |
| r2m(y, x):   |                 |         |         |         |                |         |         |         |
| r2           | 0.7683          | 0.6682  | 0.8008  | 0.7724  | 0.7629         | 0.7355  | 0.9088  | 0.7870  |
| r20          | 0.7348          | 0.6461  | 0.8004  | 0.7666  | 0.7028         | 0.7348  | 0.8782  | 0.7772  |
| rr20         | 0.7641          | 0.6232  | 0.7409  | 0.7454  | 0.7626         | 0.6633  | 0.9042  | 0.7716  |
| (r2-r20)/r2  | 0.0435          | 0.0332  | 0.0005  | 0.0075  | 0.0787         | 0.0010  | 0.0337  | 0.0125  |
| (r2-rr20)/r2 | 0.0054          | 0.0674  | 0.0749  | 0.0350  | 0.0004         | 0.0982  | 0.0051  | 0.0196  |
| K            | 0.9977          | 0.9831  | 0.9594  | 0.9887  | 1.0314         | 0.9363  | 0.9849  | 1.0045  |
| Kk           | 0.9956          | 1.0075  | 1.0358  | 1.0041  | 0.9617         | 1.0609  | 1.0128  | 0.9912  |
| R*2m(test)   | 0.6278          | 0.5687  | 0.7846  | 0.7136  | 0.5759         | 0.7155  | 0.7498  | 0.7089  |
| R2m(av)      | 0.6733          | 0.5475  | 0.6947  | 0.6795  | 0.6629         | 0.6267  | 0.7984  | 0.6990  |
| ΔR2m         | 0.0911          | 0.0423  | 0.1799  | 0.0682  | 0.1739         | 0.1777  | 0.0971  | 0.0197  |

$(r^2-r^2_0)/r^2$  should be  $<0.1$ ;  $(r^2-rr^2_0)/r^2$  should be  $<0.1$ ; Should be  $0.85 < k < 1.15$ ; Should be  $0.85 < kk < 1.15$ <sup>65</sup>;  $R^2_m(\text{test})$  and  $R^{*2}_m(\text{test})$  should be  $>0.5$ <sup>66</sup>;  $R^2_m(\text{av})$  is average value of  $R^2_m$  and should be  $>0.5$ ;  $\Delta R^2_m$  should be  $<0.2$ <sup>67</sup>

**Table S 5: External prediction criteria values for developed QSAR models of calibration and validation sets. For SMILES with IIC using equation**

| Parameters   | Calibration set |         |         |         | Validation set |         |         |         |
|--------------|-----------------|---------|---------|---------|----------------|---------|---------|---------|
|              | Split 1         | Split 2 | Split 3 | Split 4 | Split 1        | Split 2 | Split 3 | Split 4 |
| r2m(x,y):    |                 |         |         |         |                |         |         |         |
| r2           | 0.7681          | 0.7865  | 0.7162  | 0.8410  | 0.8728         | 0.7432  | 0.9198  | 0.8216  |
| r20          | 0.7398          | 0.7376  | 0.6603  | 0.7945  | 0.8602         | 0.6732  | 0.9105  | 0.7944  |
| rr20         | 0.7620          | 0.7863  | 0.7109  | 0.8397  | 0.8724         | 0.7427  | 0.8804  | 0.8210  |
| (r2-r20)/r2  | 0.0368          | 0.0622  | 0.0780  | 0.0552  | 0.0144         | 0.0942  | 0.0101  | 0.0331  |
| (r2-rr20)/r2 | 0.0080          | 0.0002  | 0.0075  | 0.0016  | 0.0004         | 0.0007  | 0.0428  | 0.0008  |
| K            | 0.9831          | 0.9992  | 1.0170  | 0.9748  | 0.9727         | 1.0290  | 1.0084  | 0.9881  |
| Kk           | 1.0111          | 0.9950  | 0.9745  | 1.0208  | 1.0245         | 0.9655  | 0.9893  | 1.0085  |
| R2m(test)    | 0.6390          | 0.6126  | 0.5469  | 0.6598  | 0.7749         | 0.5465  | 0.8313  | 0.6861  |
| r2m(y, x):   |                 |         |         |         |                |         |         |         |
| r2           | 0.7681          | 0.7865  | 0.7162  | 0.8410  | 0.8728         | 0.7432  | 0.9198  | 0.8216  |
| r20          | 0.7620          | 0.7863  | 0.7109  | 0.8397  | 0.8724         | 0.7427  | 0.8804  | 0.8210  |
| rr20         | 0.7398          | 0.7376  | 0.6603  | 0.7945  | 0.8602         | 0.6732  | 0.9105  | 0.7944  |
| (r2-r20)/r2  | 0.0080          | 0.0002  | 0.0075  | 0.0016  | 0.0004         | 0.0007  | 0.0428  | 0.0008  |
| (r2-rr20)/r2 | 0.0368          | 0.0622  | 0.0780  | 0.0552  | 0.0144         | 0.0942  | 0.0101  | 0.0331  |
| K            | 1.0111          | 0.9950  | 0.9745  | 1.0208  | 1.0245         | 0.9655  | 0.9893  | 1.0085  |
| Kk           | 0.9831          | 0.9992  | 1.0170  | 0.9748  | 0.9727         | 1.0290  | 1.0084  | 0.9881  |
| R*2m(test)   | 0.7080          | 0.7763  | 0.6638  | 0.8105  | 0.8555         | 0.7264  | 0.7372  | 0.8009  |
| R2m(av)      | 0.6735          | 0.6944  | 0.6054  | 0.7351  | 0.8152         | 0.6365  | 0.7843  | 0.7435  |
| ΔR2m         | 0.0691          | 0.1637  | 0.1169  | 0.1507  | 0.0807         | 0.1799  | 0.0941  | 0.1148  |

$(r^2-r^2_0)/r^2$  should be  $<0.1$ ;  $(r^2-rr^2_0)/r^2$  should be  $<0.1$ ; Should be  $0.85 < k < 1.15$ ; Should be  $0.85 < kk < 1.15^{65}$ ;  $R^2_m(\text{test})$  and  $R^{*2}_m(\text{test})$  should be  $>0.5^{66}$ ;  $R^2_m(\text{av})$  is average value of  $R^2_m$  and should be  $>0.5$ ;  $\Delta R^2_m$  should be  $<0.2^{67}$

**Table S 6: Y-randomization results for four splits For Smiles Without IIC using equation**

|                                                       | Split 1 |          |        | Split 2 |          |        | Split 3 |          |        | Split4 |          |        |
|-------------------------------------------------------|---------|----------|--------|---------|----------|--------|---------|----------|--------|--------|----------|--------|
|                                                       | Train   | InvTrain | Calib  | Train   | InvTrain | Calib  | Train   | InvTrain | Calib  | Train  | InvTrain | Calib  |
| n                                                     | 14      | 14       | 13     | 14      | 14       | 13     | 13      | 13       | 14     | 14     | 12       | 15     |
| R <sup>2</sup>                                        | 0.9243  | 0.9391   | 0.7683 | 0.9309  | 0.9256   | 0.6682 | 0.8653  | 0.8307   | 0.8008 | 0.8570 | 0.9076   | 0.7724 |
| 1                                                     | 0.0768  | 0.0861   | 0.0974 | 0.0101  | 0.0797   | 0.0647 | 0.0188  | 0.0053   | 0.0000 | 0.0176 | 0.1338   | 0.0429 |
| 2                                                     | 0.0397  | 0.0167   | 0.0178 | 0.0270  | 0.2223   | 0.2164 | 0.0301  | 0.1852   | 0.2827 | 0.0117 | 0.0009   | 0.0098 |
| 3                                                     | 0.0043  | 0.0053   | 0.2240 | 0.0840  | 0.1464   | 0.0581 | 0.0300  | 0.0069   | 0.5824 | 0.1965 | 0.0047   | 0.0259 |
| 4                                                     | 0.1800  | 0.0585   | 0.0001 | 0.0009  | 0.1123   | 0.1055 | 0.0477  | 0.0001   | 0.0289 | 0.1318 | 0.0325   | 0.0018 |
| 5                                                     | 0.1118  | 0.0550   | 0.0129 | 0.0132  | 0.0337   | 0.0092 | 0.0590  | 0.0509   | 0.4836 | 0.0175 | 0.0983   | 0.0003 |
| 6                                                     | 0.0942  | 0.0164   | 0.0909 | 0.0104  | 0.2889   | 0.0165 | 0.1196  | 0.0013   | 0.0323 | 0.1165 | 0.0058   | 0.0641 |
| 7                                                     | 0.0694  | 0.0056   | 0.0126 | 0.1005  | 0.0008   | 0.0422 | 0.0067  | 0.0961   | 0.2894 | 0.0226 | 0.1426   | 0.0017 |
| 8                                                     | 0.0249  | 0.1127   | 0.1619 | 0.0207  | 0.0145   | 0.0036 | 0.0008  | 0.0000   | 0.0113 | 0.0534 | 0.0092   | 0.0294 |
| 9                                                     | 0.0697  | 0.0276   | 0.3001 | 0.0171  | 0.0016   | 0.0138 | 0.0550  | 0.0470   | 0.0039 | 0.0014 | 0.0007   | 0.3649 |
| 10                                                    | 0.1926  | 0.1279   | 0.7496 | 0.1198  | 0.0453   | 0.2229 | 0.0051  | 0.0584   | 0.1778 | 0.0062 | 0.0524   | 0.0287 |
| Rr <sup>2*</sup>                                      | 0.0864  | 0.0512   | 0.1667 | 0.0404  | 0.0945   | 0.0753 | 0.0373  | 0.0451   | 0.1892 | 0.0575 | 0.0481   | 0.0569 |
| <sup>c</sup> R <sup>2</sup> <sub>p</sub> <sup>#</sup> | 0.8800  | 0.9132   | 0.6798 | 0.9105  | 0.8770   | 0.6295 | 0.8465  | 0.8079   | 0.6998 | 0.8277 | 0.8833   | 0.7434 |

\* Average randomized R<sup>2</sup>; # <sup>c</sup>R<sup>2</sup><sub>p</sub> = R × (R<sup>2</sup> - R<sup>2</sup><sub>r</sub>)<sup>1/2</sup> where <sup>c</sup>R<sup>2</sup><sub>p</sub> should be greater than 0.5

**Table S 7: Y-randomization results for four splits For Smiles With IIC using equation**

|                                           | Split 1 |          |        | Split 2 |          |        | Split 3 |          |        | Split4 |          |        |
|-------------------------------------------|---------|----------|--------|---------|----------|--------|---------|----------|--------|--------|----------|--------|
|                                           | Train   | InvTrain | Calib  | Train   | InvTrain | Calib  | Train   | InvTrain | Calib  | Train  | InvTrain | Calib  |
| N                                         | 14      | 14       | 13     | 14      | 14       | 13     | 13      | 13       | 14     | 14     | 12       | 15     |
| R <sup>2</sup>                            | 0.8700  | 0.8355   | 0.7681 | 0.9438  | 0.9024   | 0.7865 | 0.9223  | 0.6517   | 0.7162 | 0.8006 | 0.9400   | 0.8410 |
| 1                                         | 0.3778  | 0.0877   | 0.0010 | 0.0722  | 0.2331   | 0.0104 | 0.0052  | 0.0042   | 0.1675 | 0.0101 | 0.0965   | 0.0618 |
| 2                                         | 0.0787  | 0.0228   | 0.0040 | 0.0356  | 0.0463   | 0.5848 | 0.2524  | 0.0615   | 0.2233 | 0.0272 | 0.0011   | 0.0284 |
| 3                                         | 0.0277  | 0.0459   | 0.0016 | 0.0081  | 0.0005   | 0.3146 | 0.0046  | 0.0015   | 0.0629 | 0.6171 | 0.0005   | 0.0022 |
| 4                                         | 0.0068  | 0.1821   | 0.0583 | 0.0088  | 0.0970   | 0.0395 | 0.1789  | 0.0100   | 0.0000 | 0.0103 | 0.0502   | 0.0084 |
| 5                                         | 0.0299  | 0.1091   | 0.0593 | 0.0002  | 0.3722   | 0.0000 | 0.0179  | 0.0236   | 0.0953 | 0.0007 | 0.0011   | 0.0116 |
| 6                                         | 0.0000  | 0.2061   | 0.0414 | 0.0028  | 0.0302   | 0.0001 | 0.0716  | 0.2725   | 0.0876 | 0.0910 | 0.2709   | 0.1318 |
| 7                                         | 0.0004  | 0.0003   | 0.3053 | 0.2071  | 0.0013   | 0.0829 | 0.0059  | 0.1093   | 0.0044 | 0.0199 | 0.0248   | 0.1867 |
| 8                                         | 0.1629  | 0.1710   | 0.0003 | 0.0396  | 0.0654   | 0.1639 | 0.0166  | 0.0100   | 0.1001 | 0.1294 | 0.0280   | 0.0529 |
| 9                                         | 0.0143  | 0.0009   | 0.0036 | 0.0107  | 0.0999   | 0.0381 | 0.0068  | 0.0000   | 0.0247 | 0.2251 | 0.0079   | 0.0001 |
| 10                                        | 0.1210  | 0.0939   | 0.1332 | 0.0142  | 0.0001   | 0.0071 | 0.1017  | 0.0003   | 0.1508 | 0.0030 | 0.0609   | 0.3965 |
| R <sub>r</sub> <sup>2*</sup>              | 0.0819  | 0.0920   | 0.0608 | 0.0399  | 0.0946   | 0.1241 | 0.0661  | 0.0493   | 0.0917 | 0.1134 | 0.0542   | 0.0880 |
| <sup>c</sup> R <sub>p</sub> <sup>2#</sup> | 0.8280  | 0.7881   | 0.7370 | 0.9237  | 0.8538   | 0.7218 | 0.8886  | 0.6266   | 0.6688 | 0.7417 | 0.9125   | 0.7958 |

\* Average randomized R<sup>2</sup>; # <sup>c</sup>R<sub>p</sub><sup>2</sup> = R × (R<sup>2</sup> - R<sub>r</sub><sup>2</sup>)<sup>1/2</sup> where <sup>c</sup>R<sub>p</sub><sup>2</sup> should be greater than 0.5



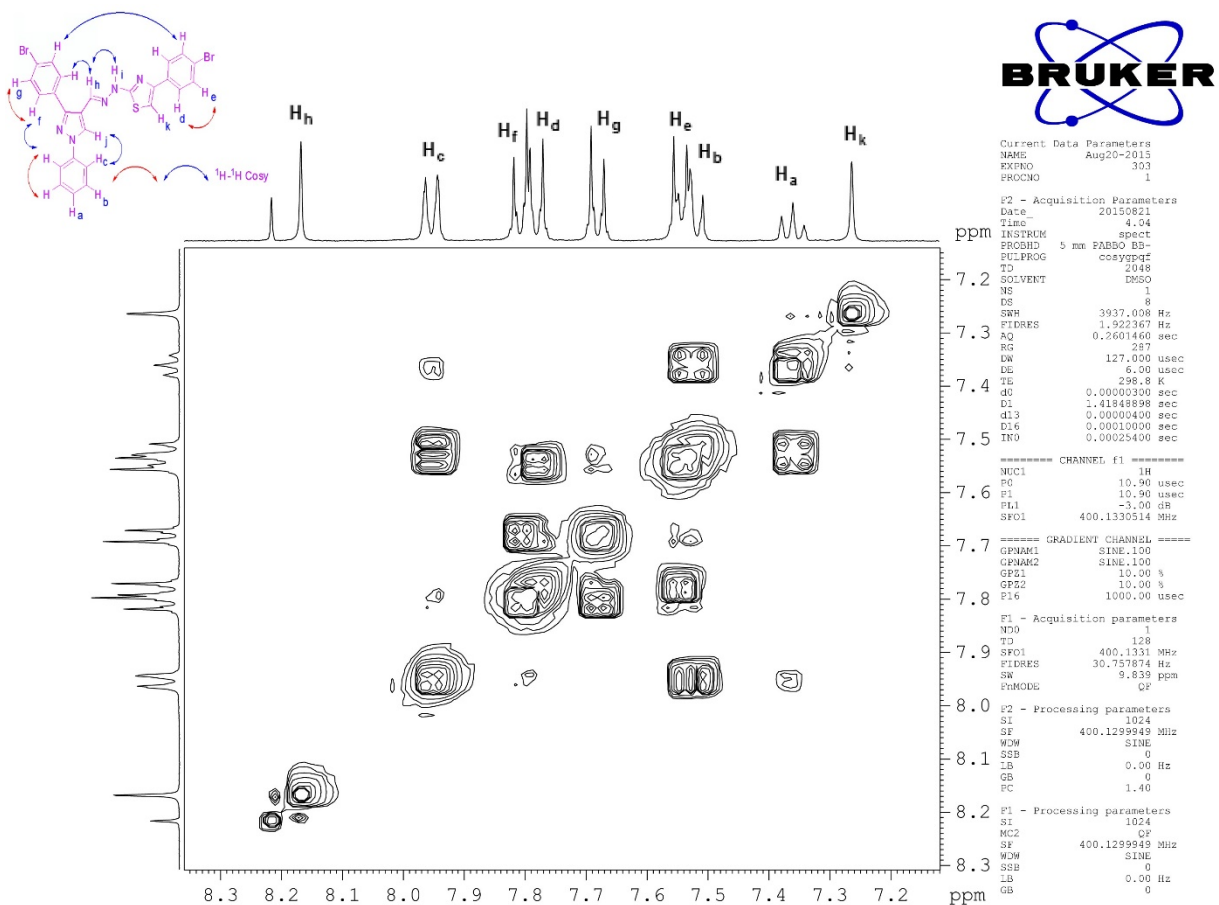

Figure 3:  $^1\text{H}$ - $^1\text{H}$  Cosy of 1-((3-(4-Bromophenyl)-1-phenyl-1H-pyrazole-4-yl)methylene)-2-(4-(4-bromophenyl)thiazol-2-yl)hydrazine (4a)

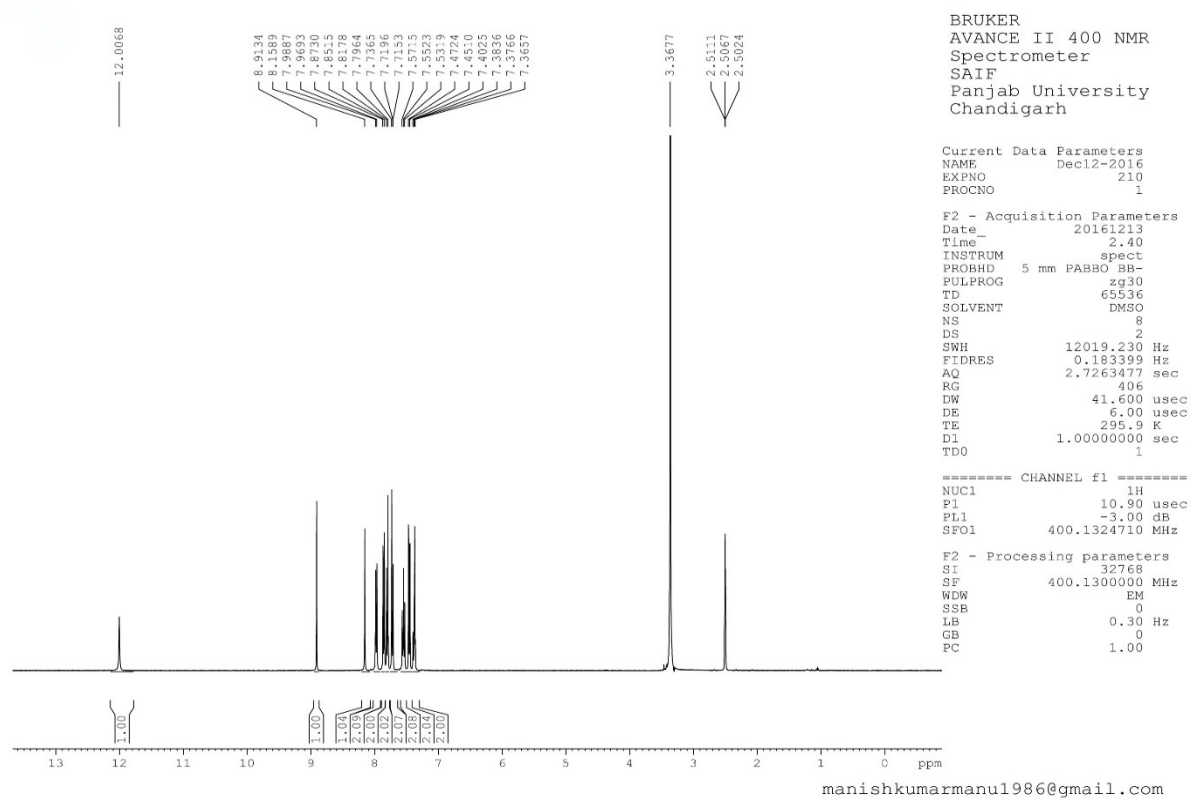

Figure 4:  $^1\text{H}$  NMR 1-((3-(4-Bromophenyl)-1-phenyl-1H-pyrazole-4-yl)methylene)-2-(4-(4-chlorophenyl)thiazol-2-yl)hydrazine (4b)



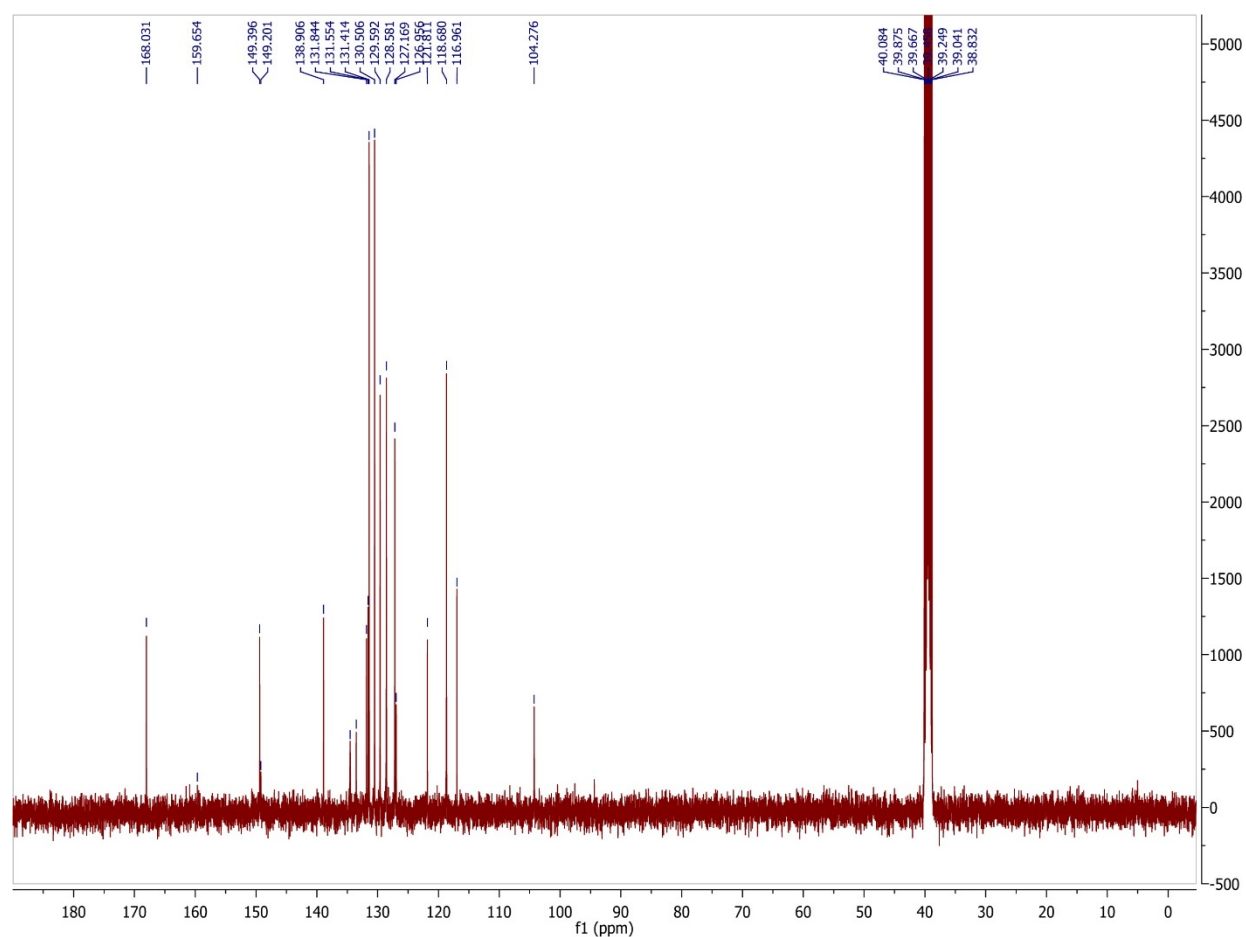

**Figure 5:  $^{13}\text{C}$  NMR of 1-((3-(4-Bromophenyl)-1-phenyl-1H-pyrazole-4-yl)methylene)-2-(4-(4-chlorophenyl)thiazol-2-yl)hydrazine (4b)**

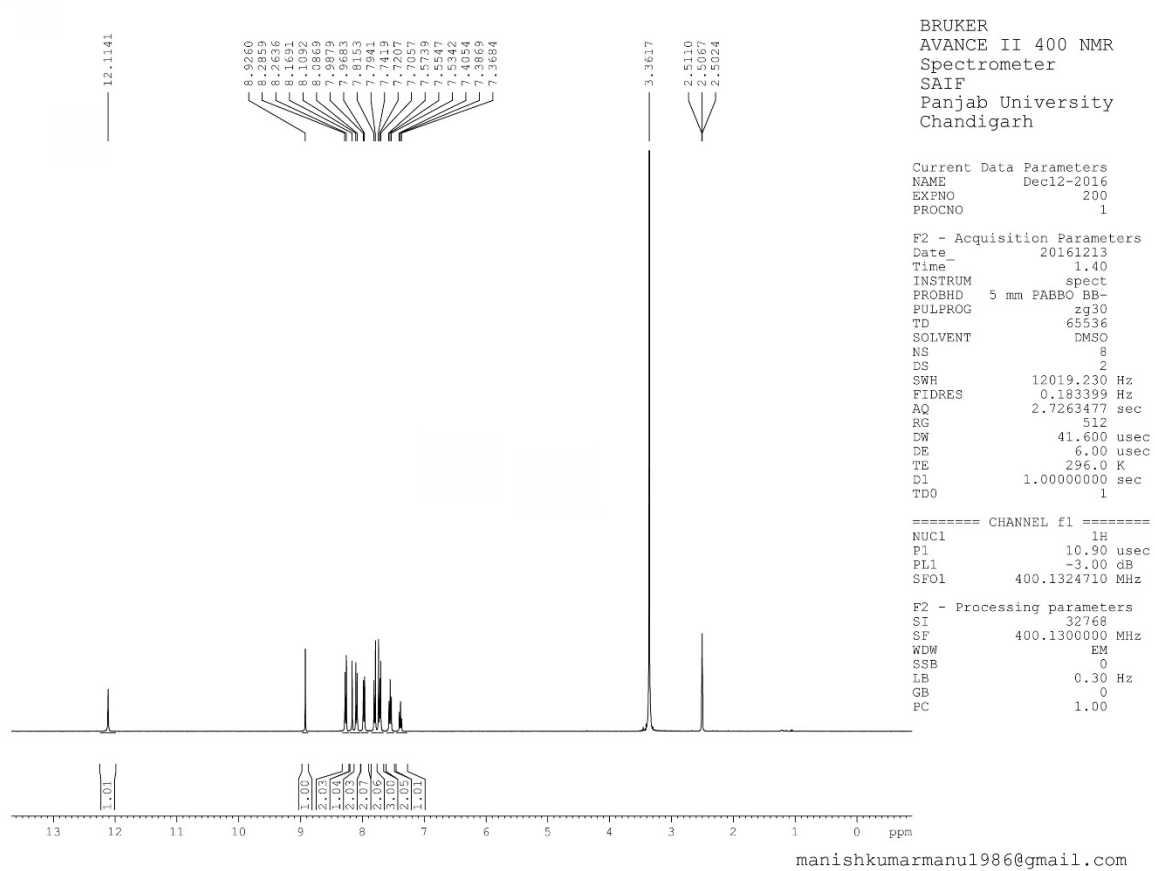

**Figure 6:  $^1\text{H}$  NMR of 1-((3-(4-Bromophenyl)-1-phenyl-1H-pyrazole-4-yl)methylene)-2-(4-(4-nitrophenyl)thiazol-2-yl)hydrazine (4c)**

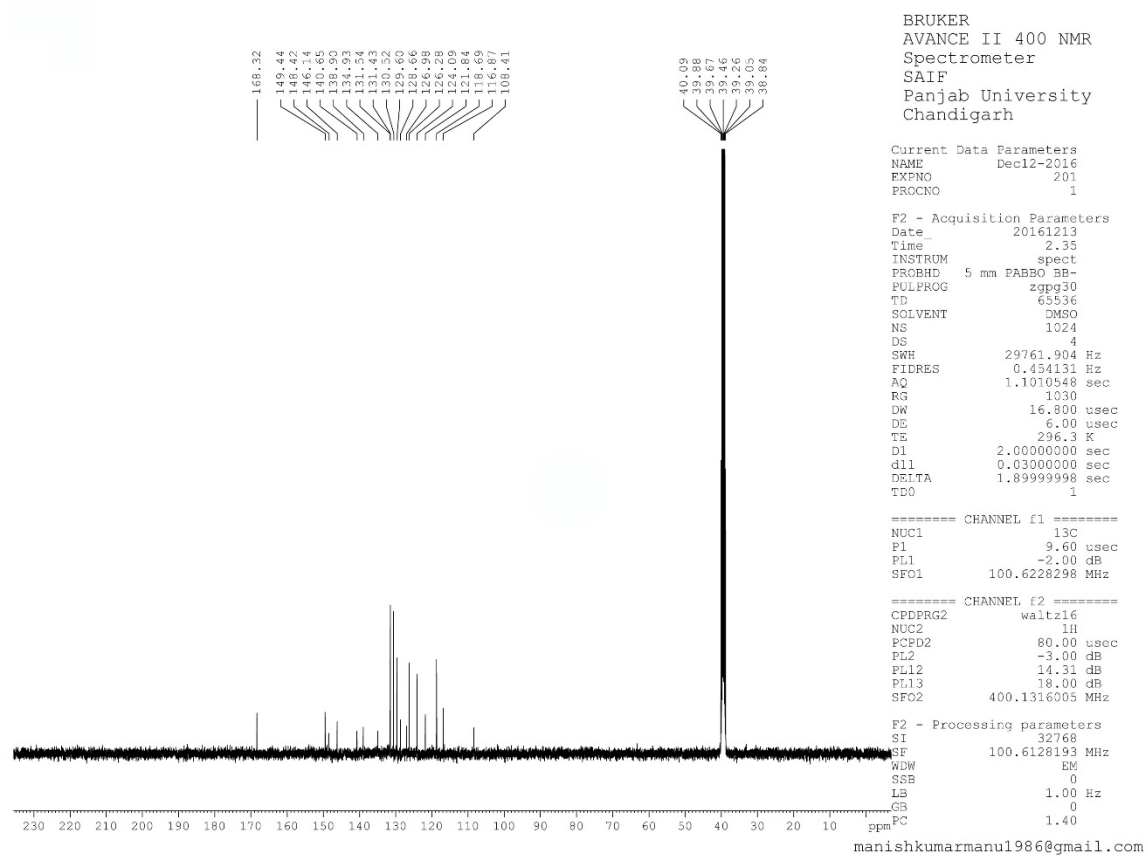

**Figure 7:  $^{13}\text{C}$  NMR of 1-((3-(4-Bromophenyl)-1-phenyl-1H-pyrazole-4-yl)methylene)-2-(4-(4-nitrophenyl)thiazol-2-yl)hydrazine (4c)**

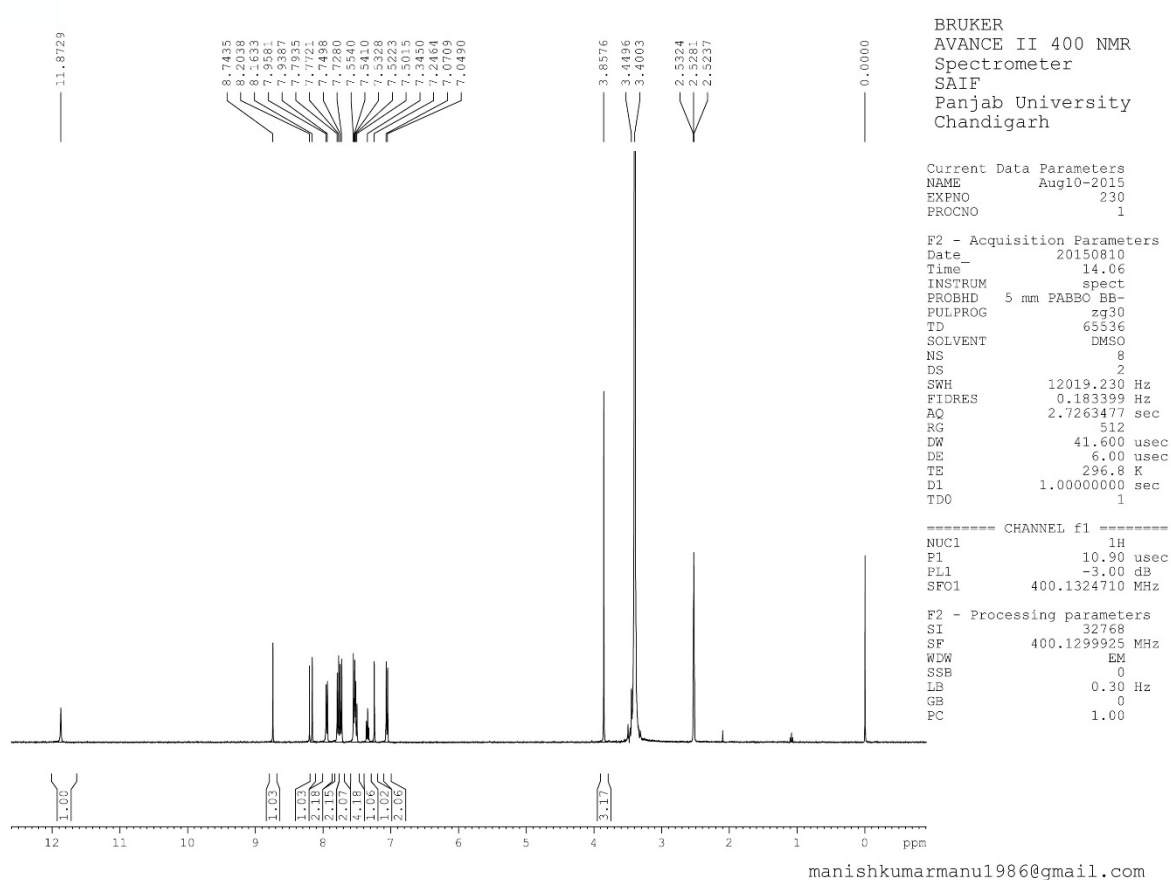

**Figure 8:  $^1\text{H}$  NMR of 1-((3-(4-Methoxyphenyl)-1-phenyl-1H-pyrazole-4-yl)methylene)-2-(4-(4-bromophenyl) thiazol-2-yl)hydrazine (4d)**

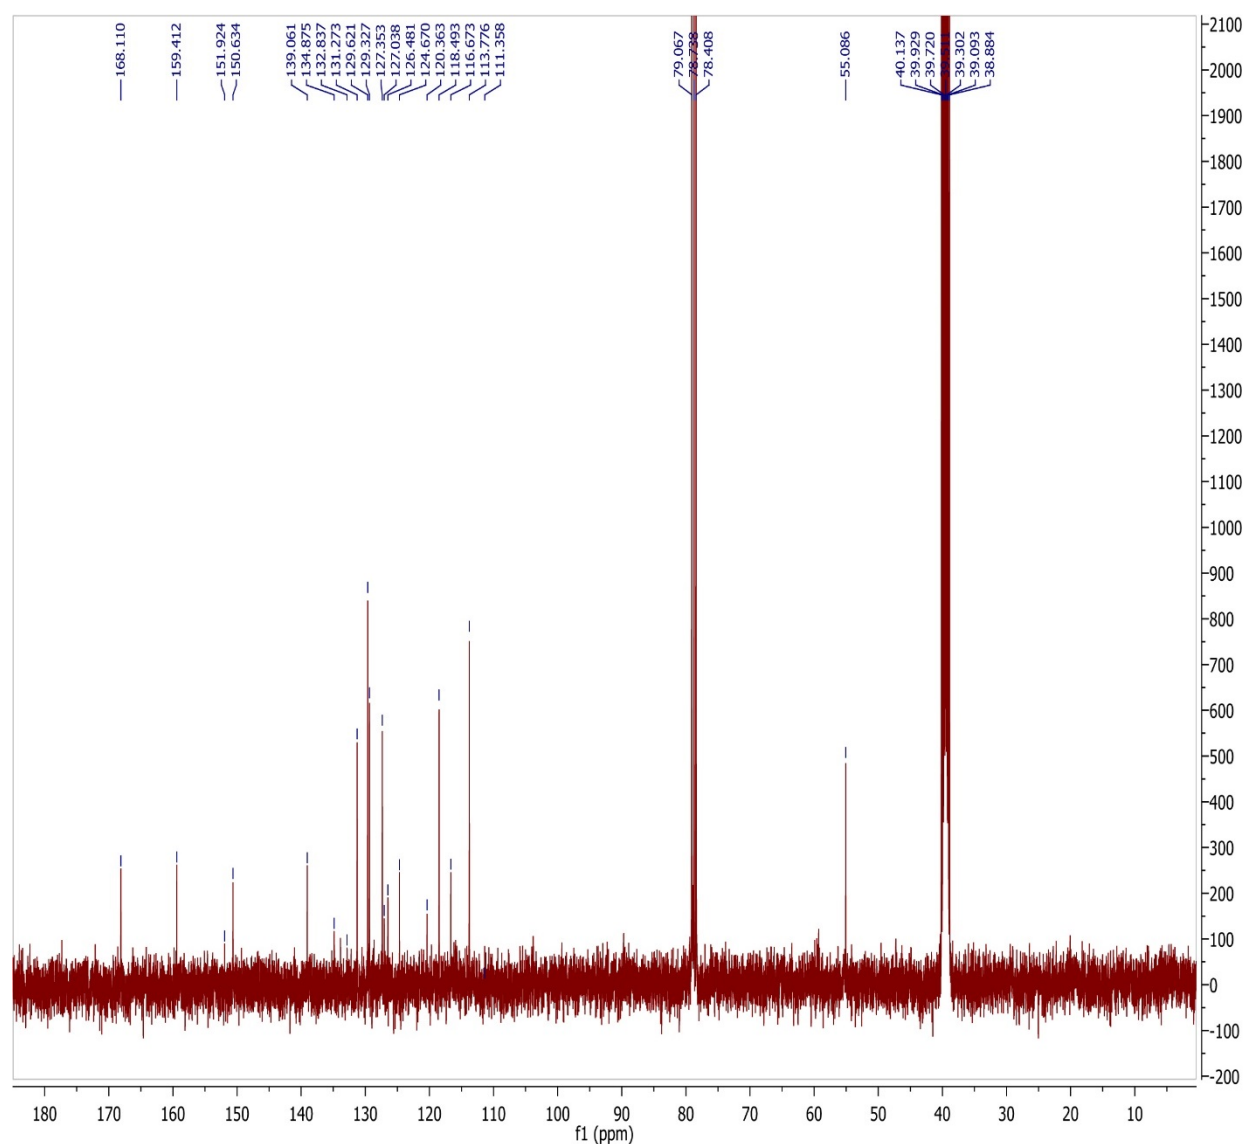

**Figure 9:**  $^{13}\text{C}$  NMR of 1-((3-(4-Methoxyphenyl)-1-phenyl-1H-pyrazole-4-yl)methylene)-2-(4-(4-bromophenyl) thiazol-2-yl)hydrazine (4d)

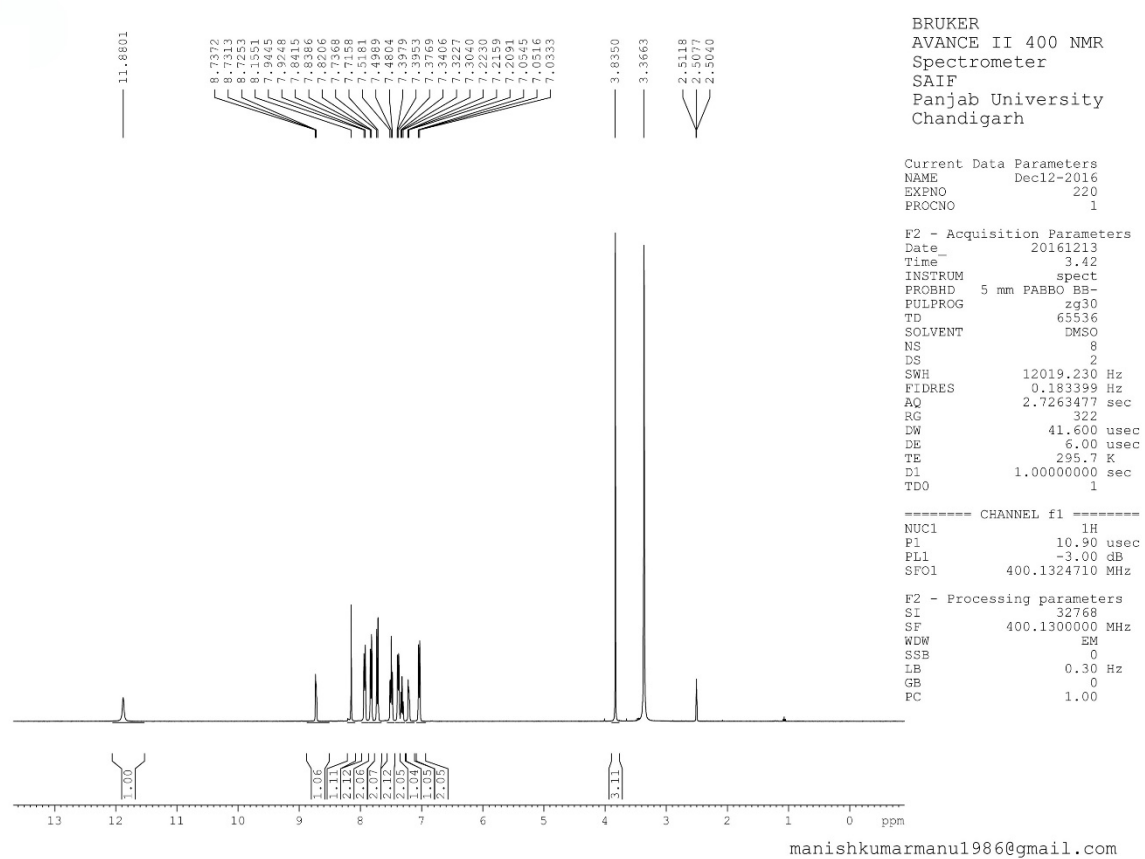

**Figure 10:**  $^1\text{H}$  NMR of 1-((3-(4-Methoxyphenyl)-1-phenyl-1H-pyrazole-4-yl)methylene)-2-(4-(4-chlorophenyl) thiazol-2-yl)hydrazine (4e)



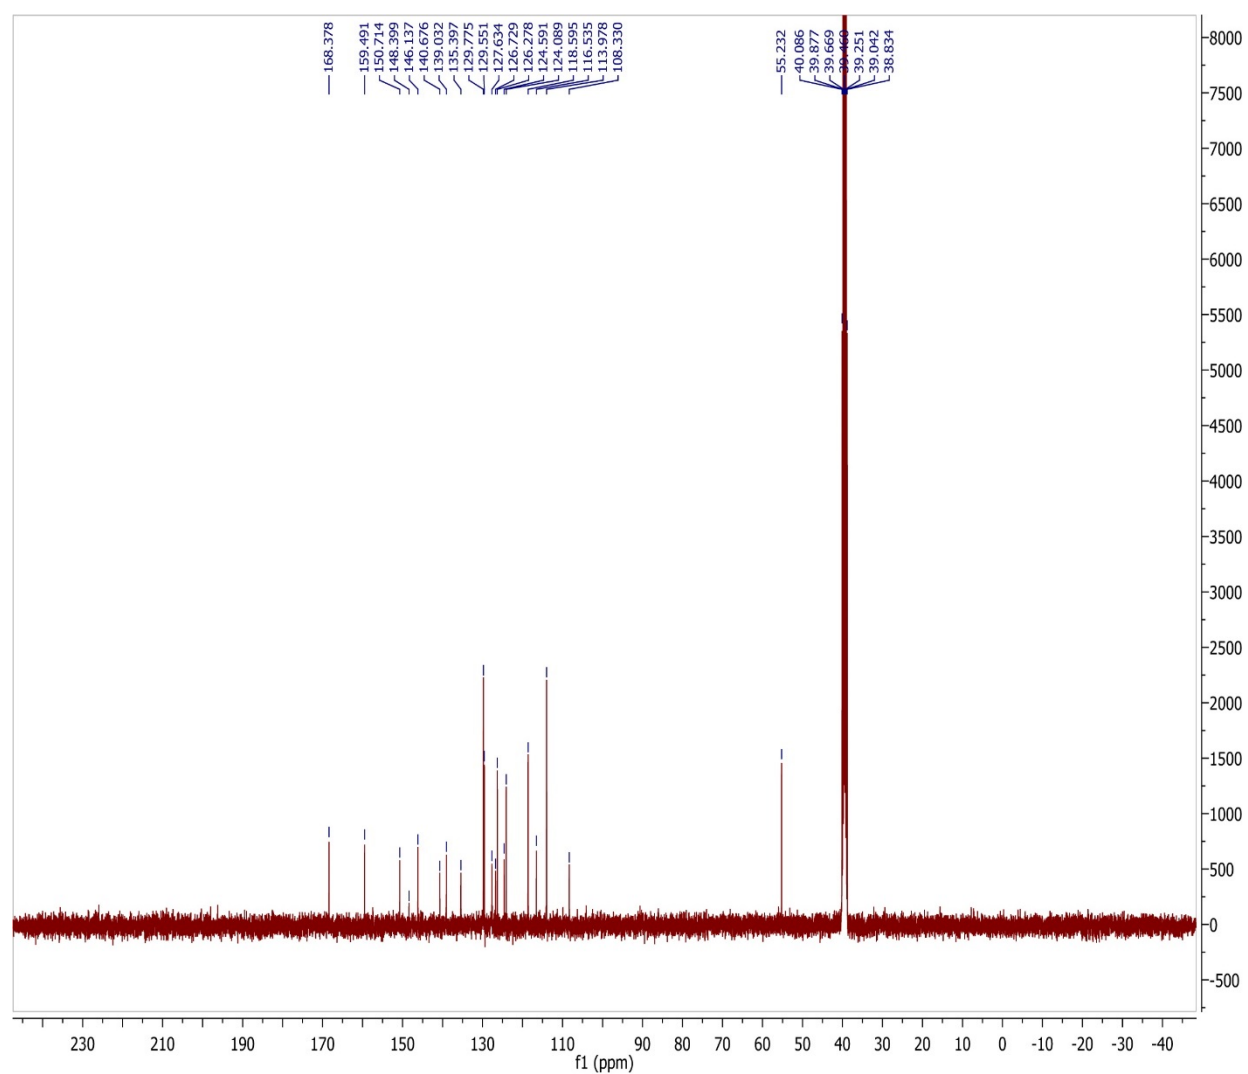

Figure 13:  $^{13}\text{C}$  NMR of 1-((3-(4-Methoxyphenyl)-1-phenyl-1H-pyrazole-4-yl)methylene)-2-(4-(4-nitrophenyl) thiazol-2-yl)hydrazine (4f)

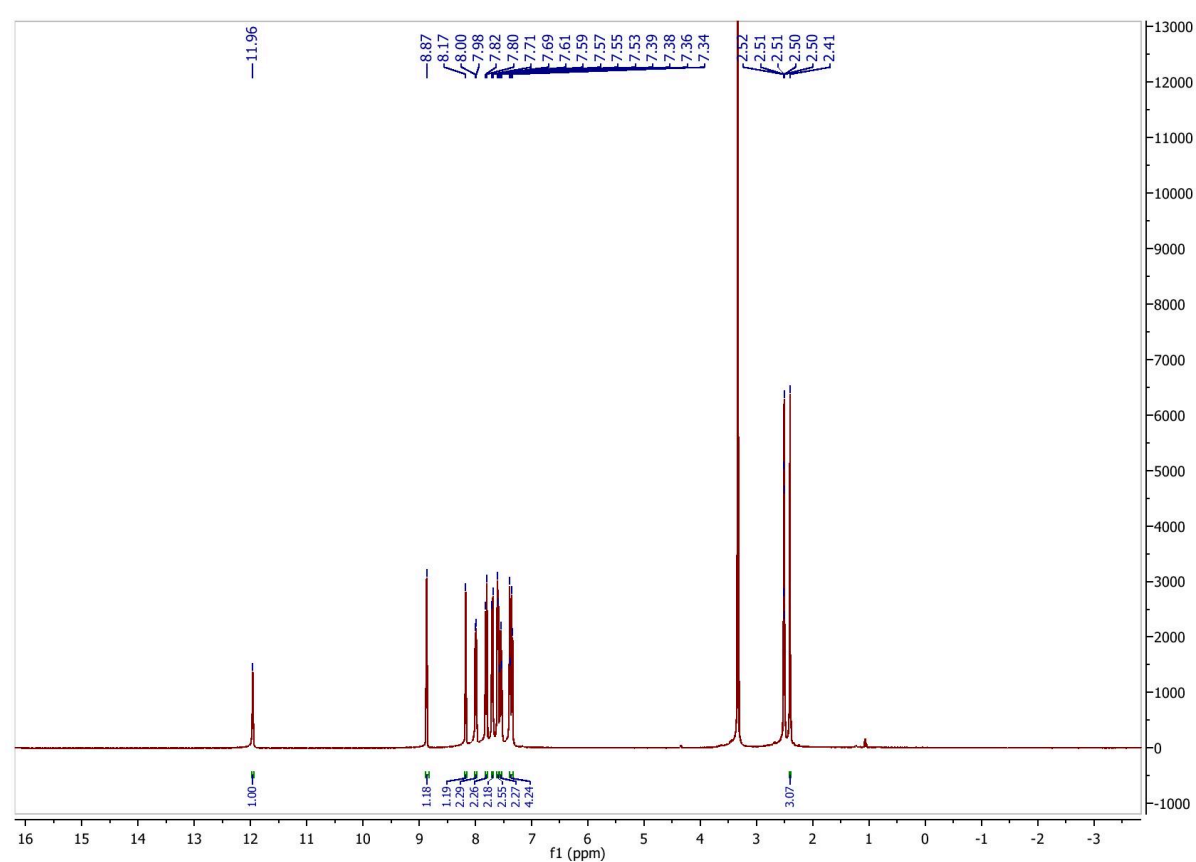

Figure 14:  $^1\text{H}$  NMR of 1-((3-(4-Methylphenyl)-1-phenyl-1H-pyrazole-4-yl)methylene)-2-(4-(4-bromophenyl) thiazol-2-yl)hydrazine (4g)

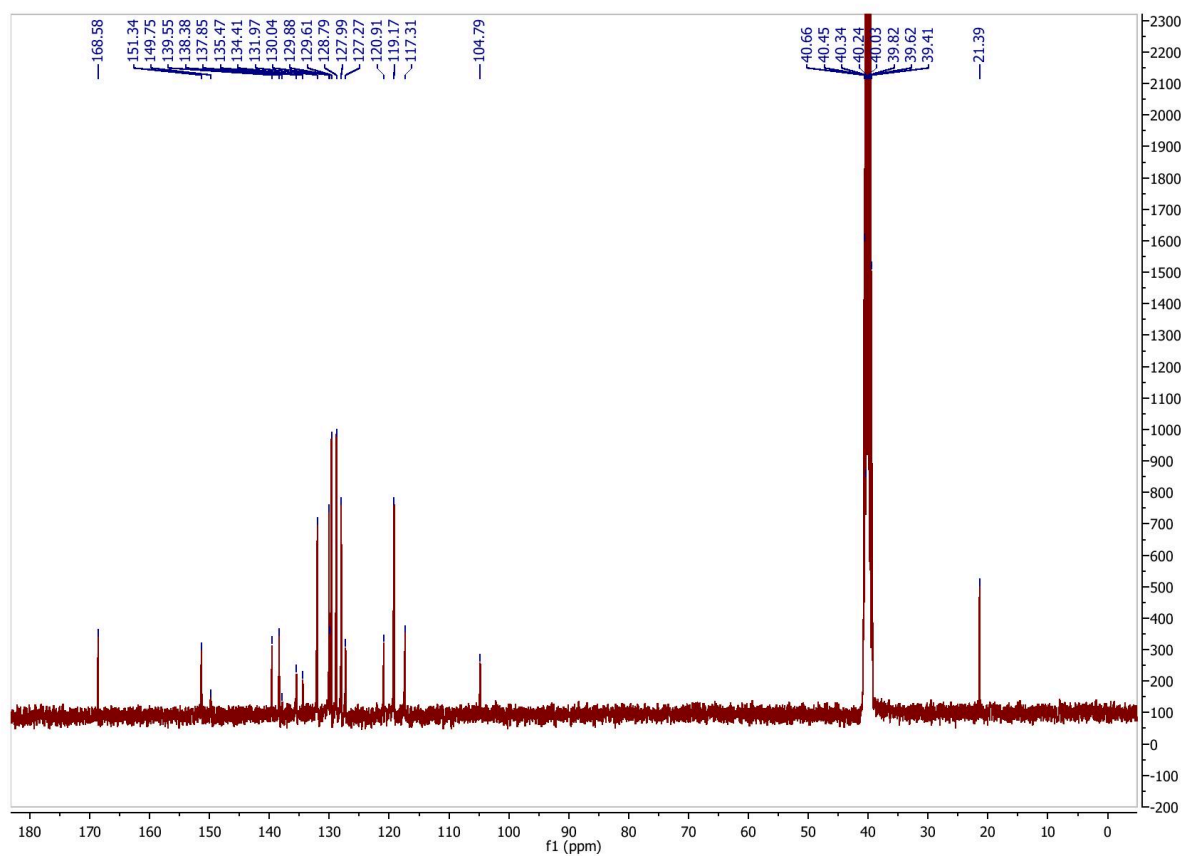

Figure 15:  $^{13}\text{C}$  NMR of 1-((3-(4-Methylphenyl)-1-phenyl-1H-pyrazole-4-yl)methylene)-2-(4-(4-bromophenyl) thiazol-2-yl)hydrazine (4g)

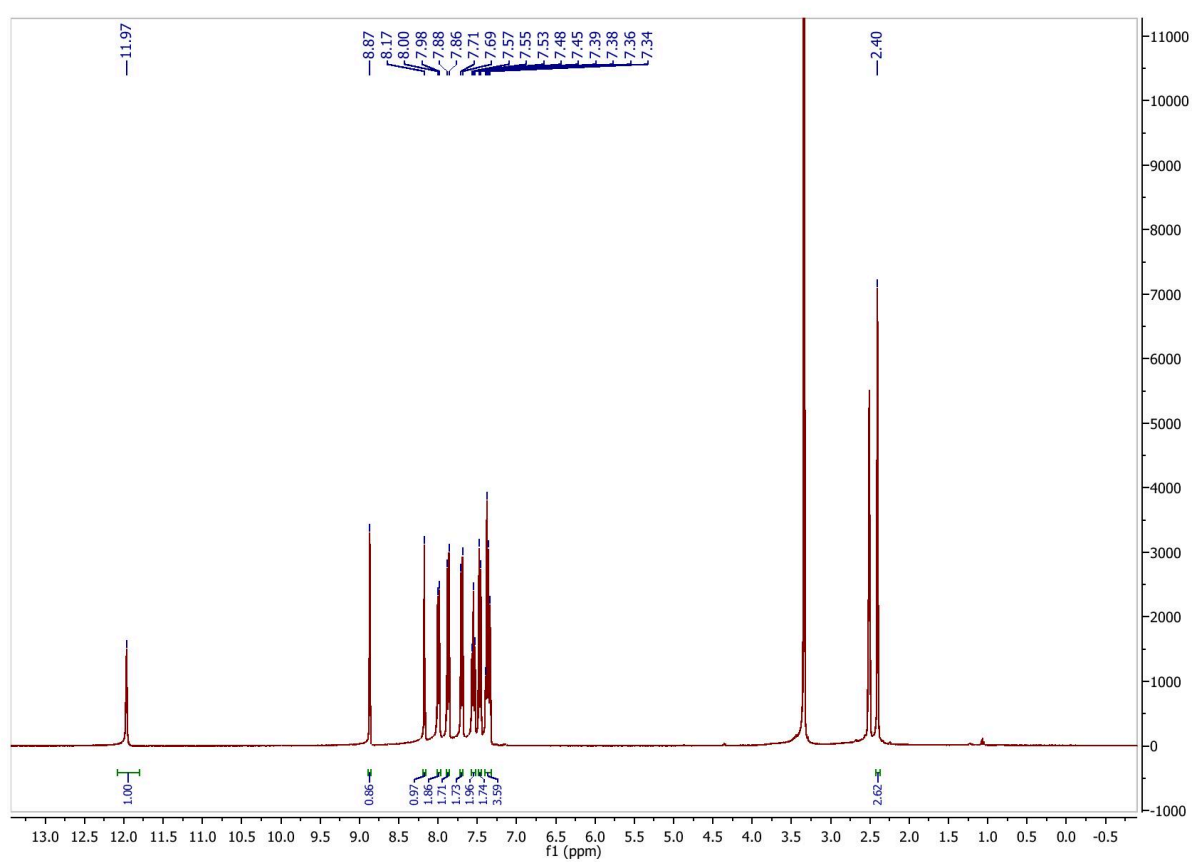

Figure 16:  $^1\text{H}$  NMR of 1-((3-(4-Methylphenyl)-1-phenyl-1H-pyrazole-4-yl)methylene)-2-(4-(4-chlorophenyl) thiazol-2-yl)hydrazine (4h)

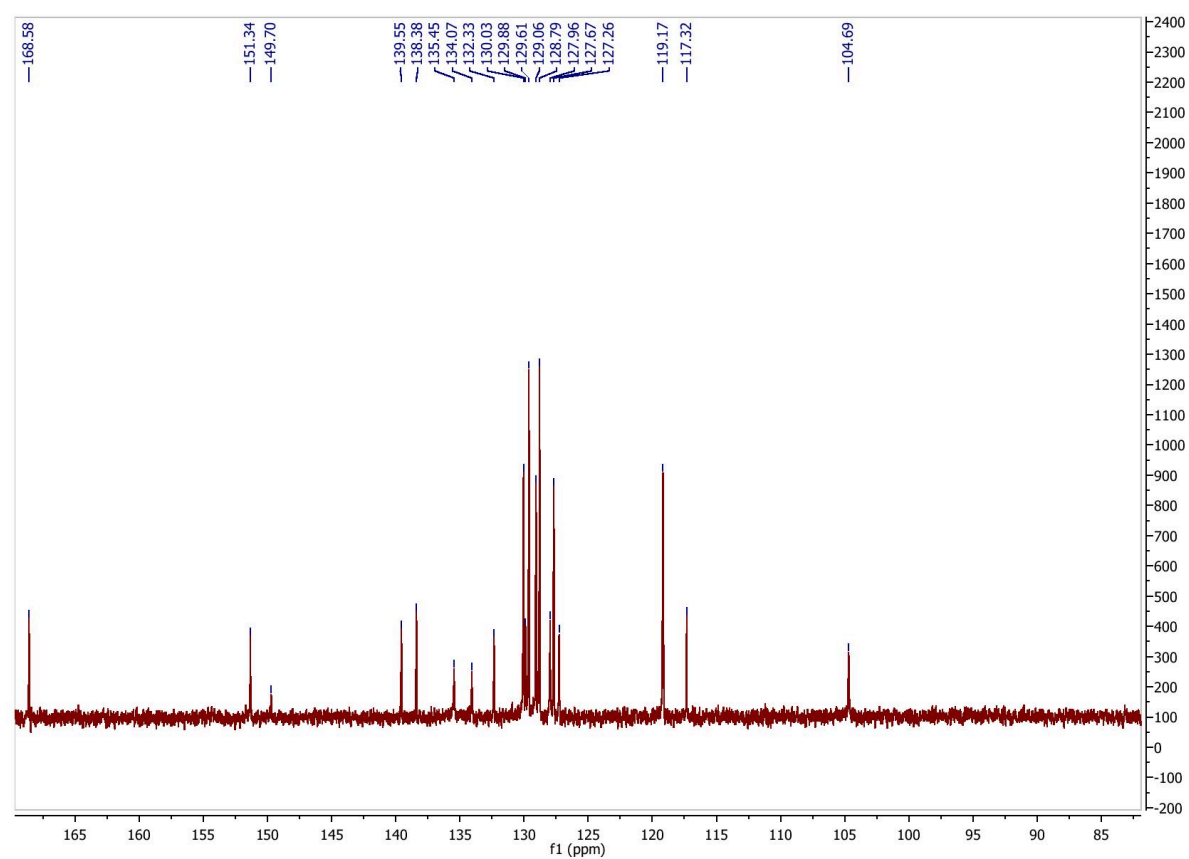

Figure 17:  $^{13}\text{C}$  NMR of 1-((3-(4-Methylphenyl)-1-phenyl-1*H*-pyrazole-4-yl)methylene)-2-(4-(4-chlorophenyl) thiazol-2-yl)hydrazine (4h)

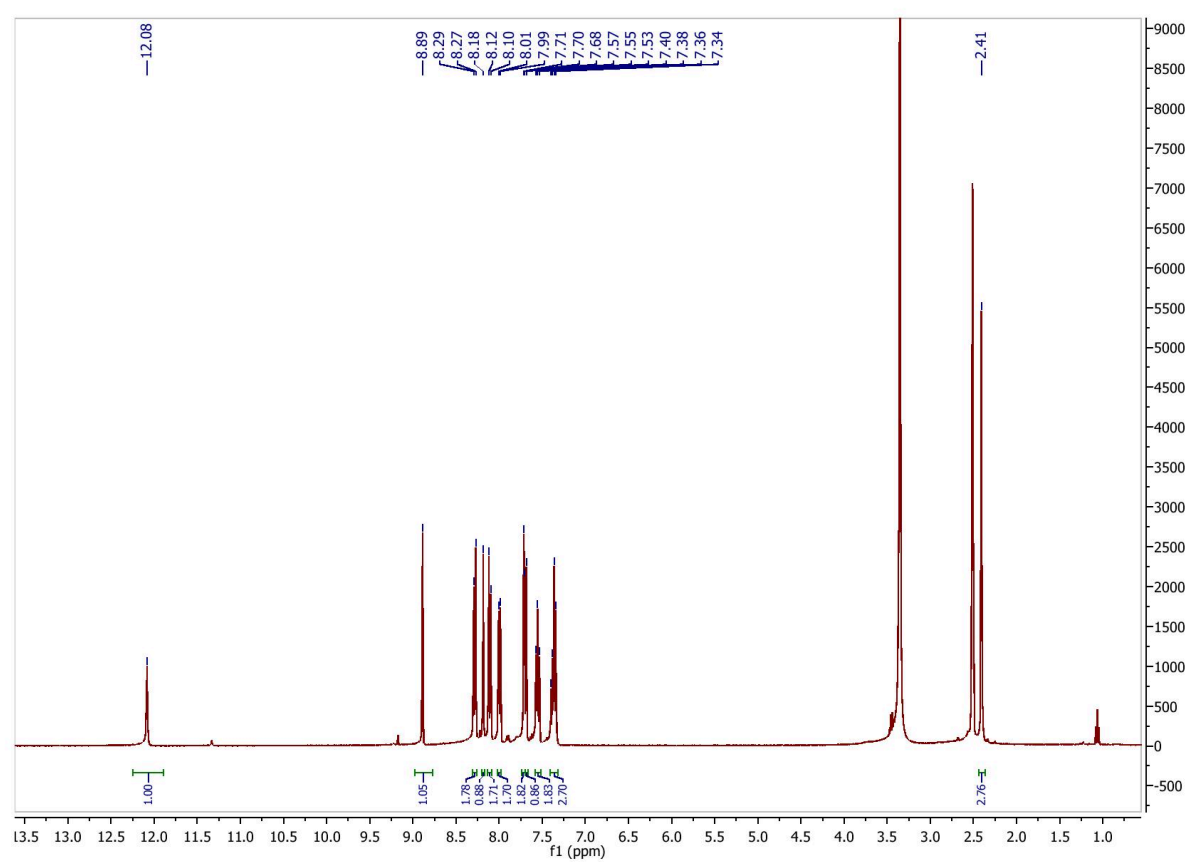

Figure 18:  $^1\text{H}$  NMR of 1-((3-(4-Methylphenyl)-1-phenyl-1*H*-pyrazole-4-yl)methylene)-2-(4-(4-nitrophenyl)thiazol-2-yl)hydrazine (4i)



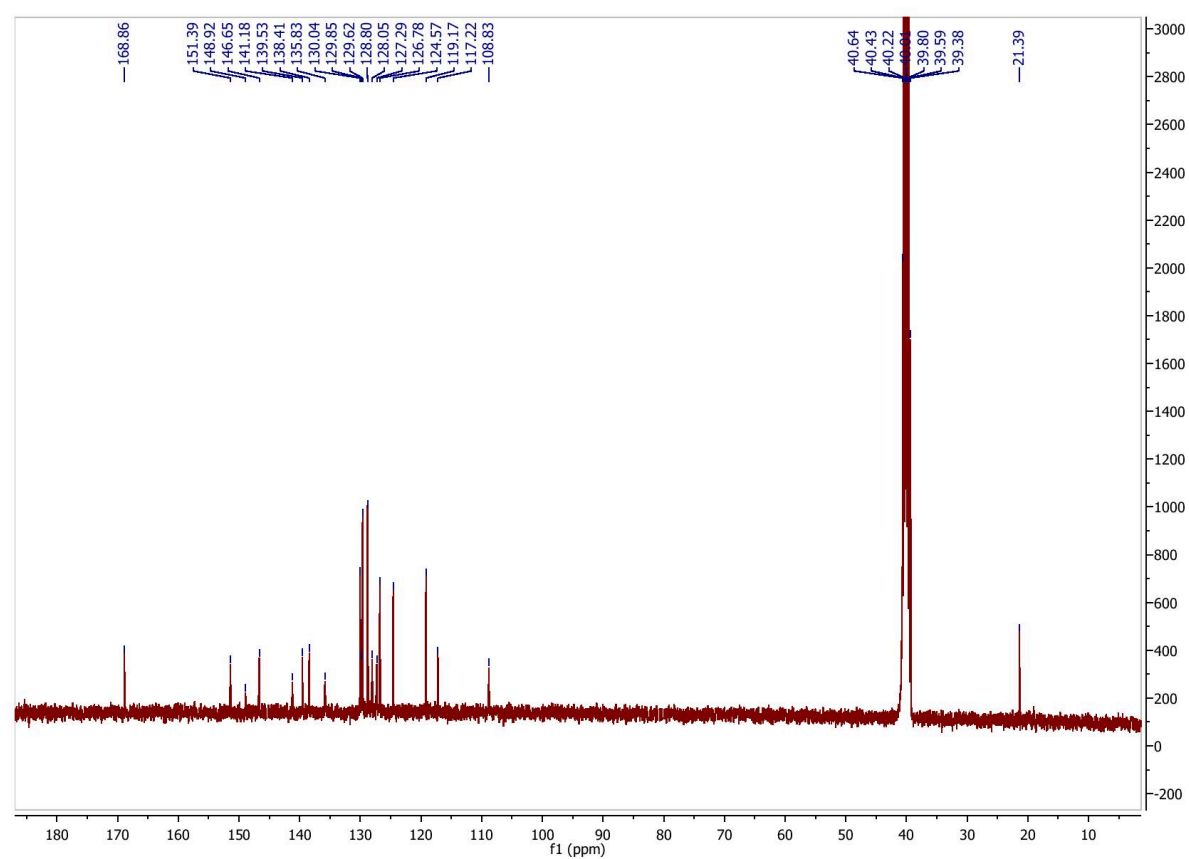

Figure 19:  $^{13}\text{C}$  NMR of 1-((3-(4-Methylphenyl)-1-phenyl-1H-pyrazole-4-yl)methylene)-2-(4-(4-nitrophenyl)thiazol-2-yl)hydrazine (4i)

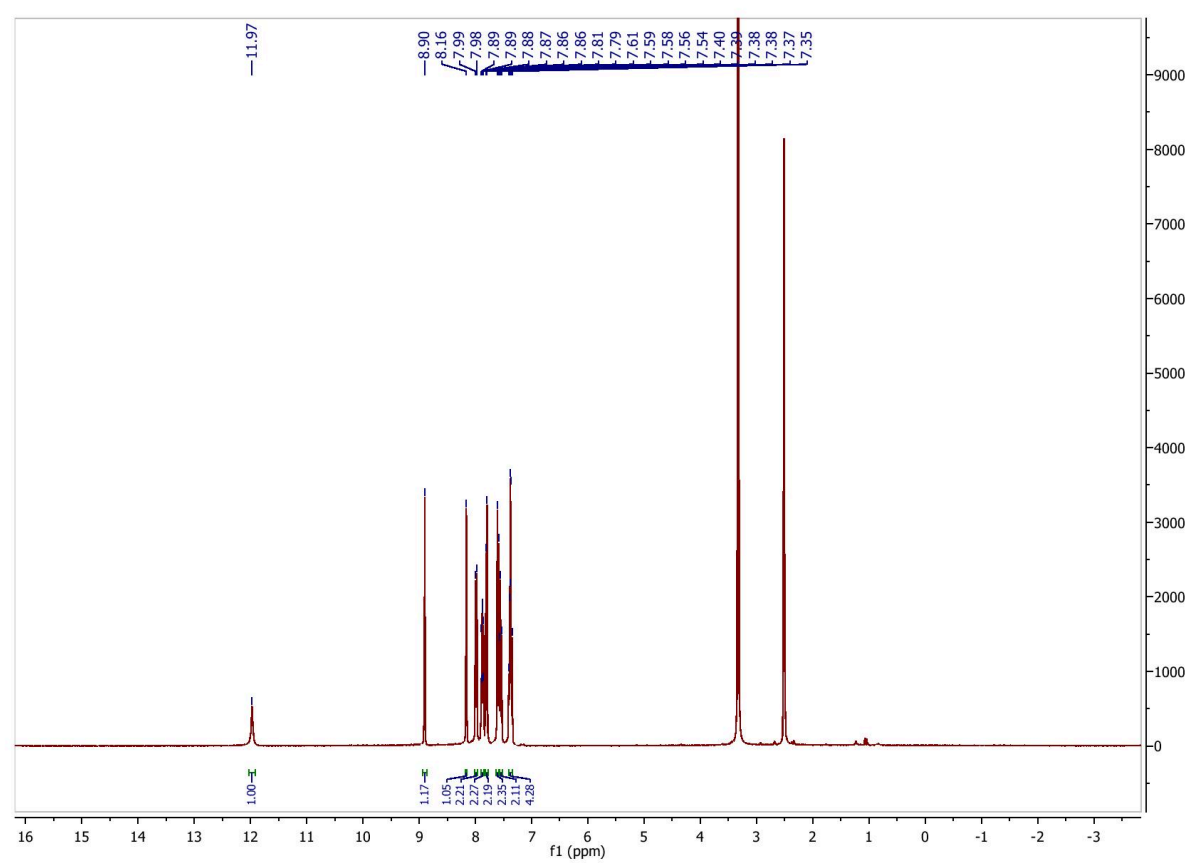

Figure 20:  $^1\text{H}$  NMR of 1-((3-(4-Fluorophenyl)-1-phenyl-1H-pyrazole-4-yl)methylene)-2-(4-(4-bromophenyl) thiazol -2-yl)hydrazine (4j)



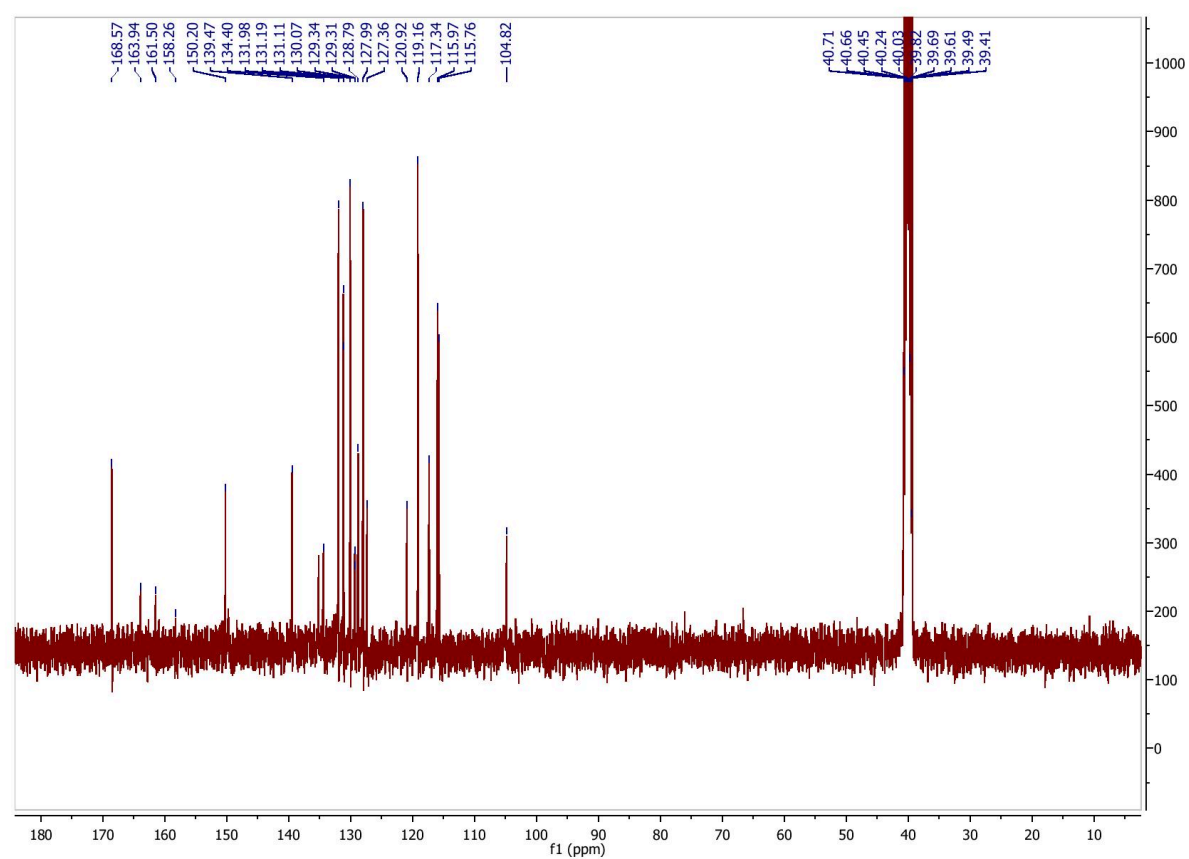

**Figure 21:**  $^{13}\text{C}$  NMR of 1-((3-(4-Fluorophenyl)-1-phenyl-1H-pyrazole-4-yl)methylene)-2-(4-(4-bromophenyl) thiazol -2-yl)hydrazine (4j)

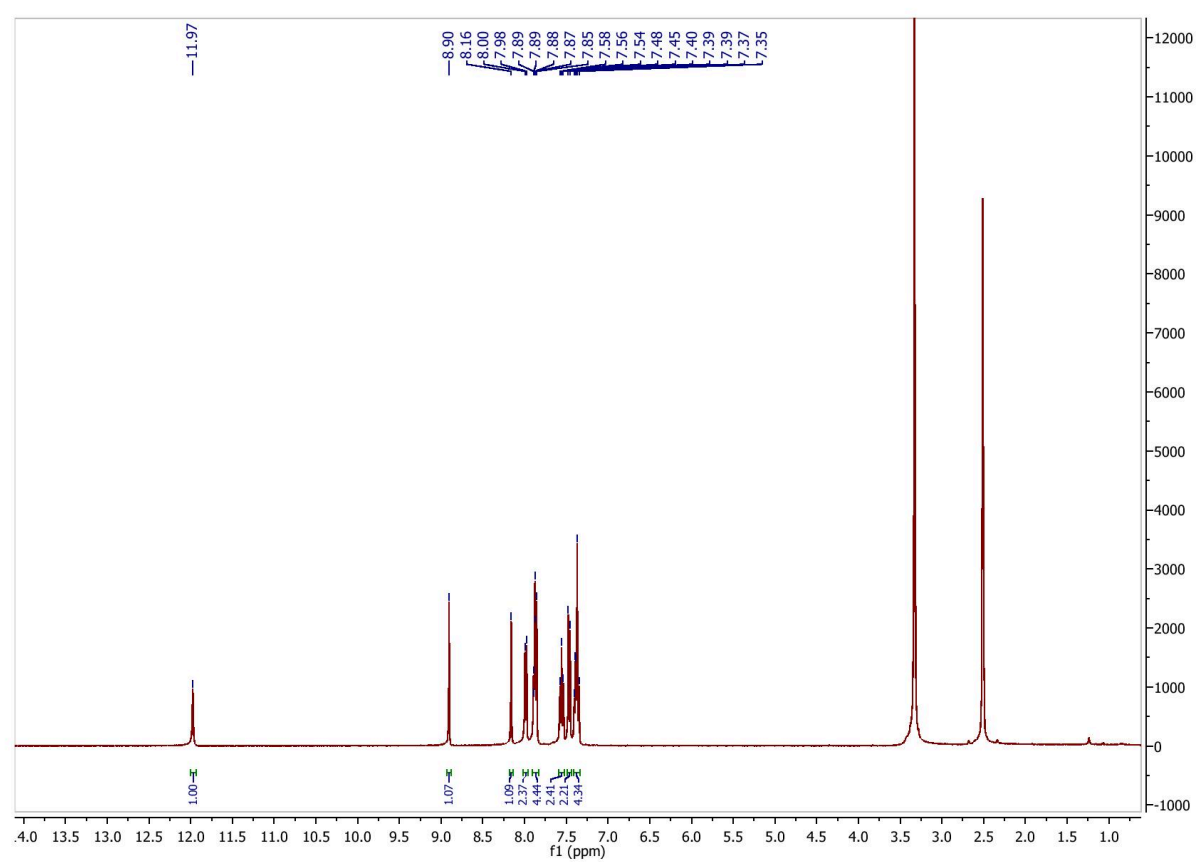

**Figure 22:**  $^1\text{H}$  NMR of 1-((3-(4-Fluorophenyl)-1-phenyl-1H-pyrazole-4-yl)methylene)-2-(4-(4-chlorophenyl)thiazol -2-yl)hydrazine (4k)

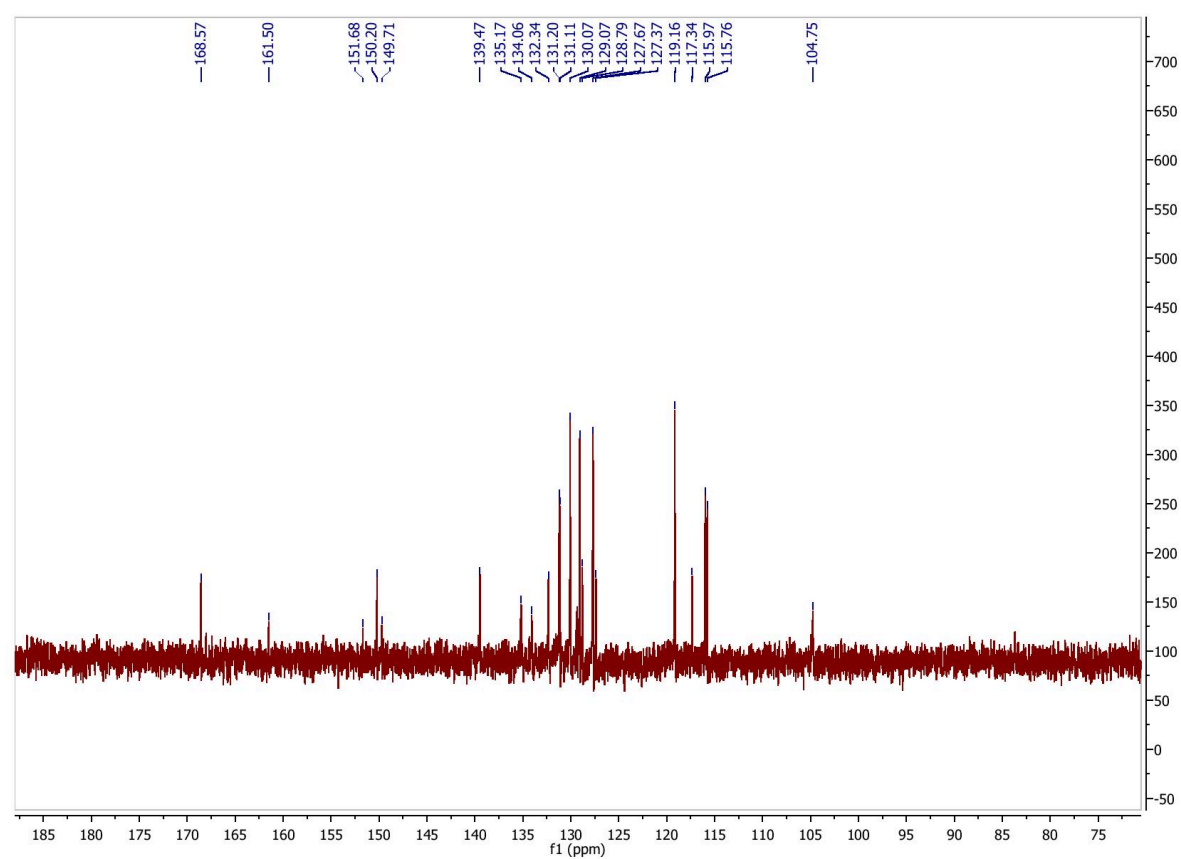

**Figure 23:**  $^{13}\text{C}$  NMR of 1-((3-(4-Fluorophenyl)-1-phenyl-1*H*-pyrazole-4-yl)methylene)-2-(4-(4-chlorophenyl)thiazol-2-yl)hydrazine (4k)

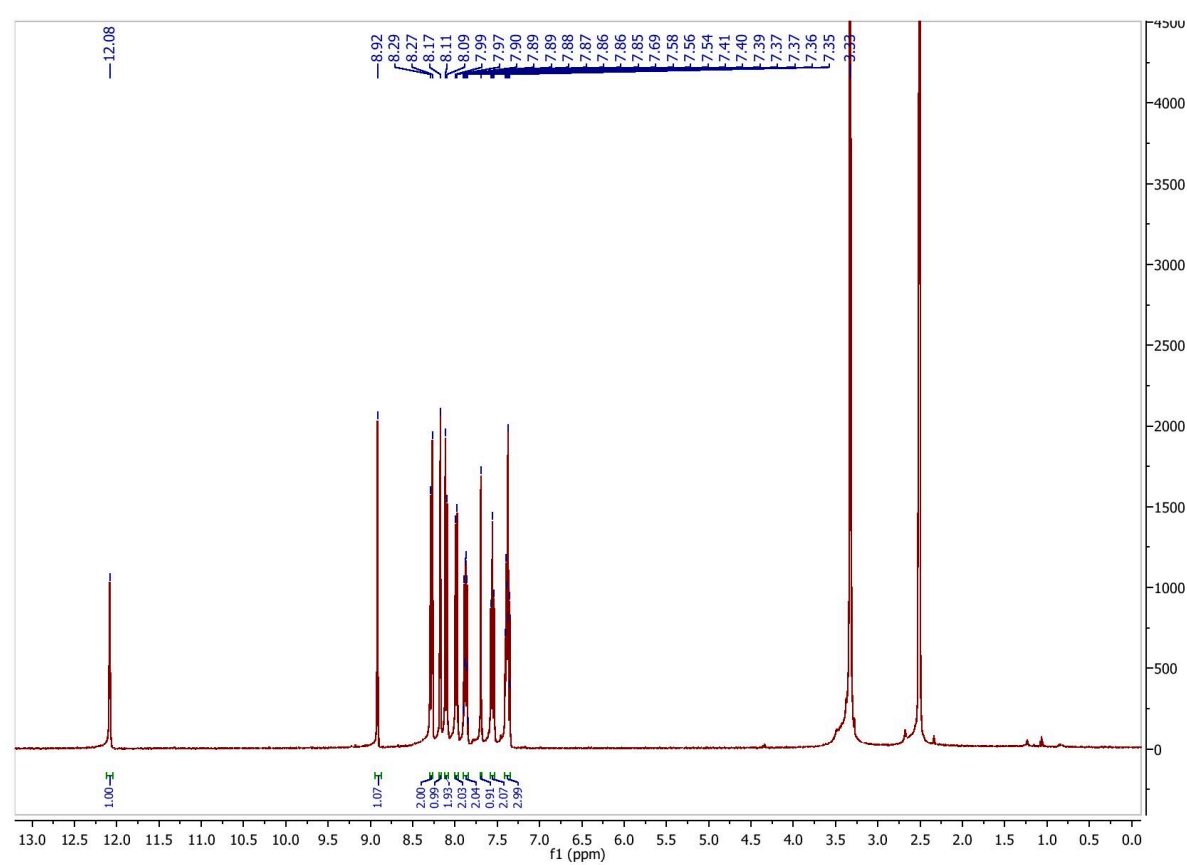

**Figure 24:**  $^1\text{H}$  NMR of 1-((3-(4-Fluorophenyl)-1-phenyl-1*H*-pyrazole-4-yl)methylene)-2-(4-(4-nitrophenyl)thiazol-2-yl)hydrazine (4l)

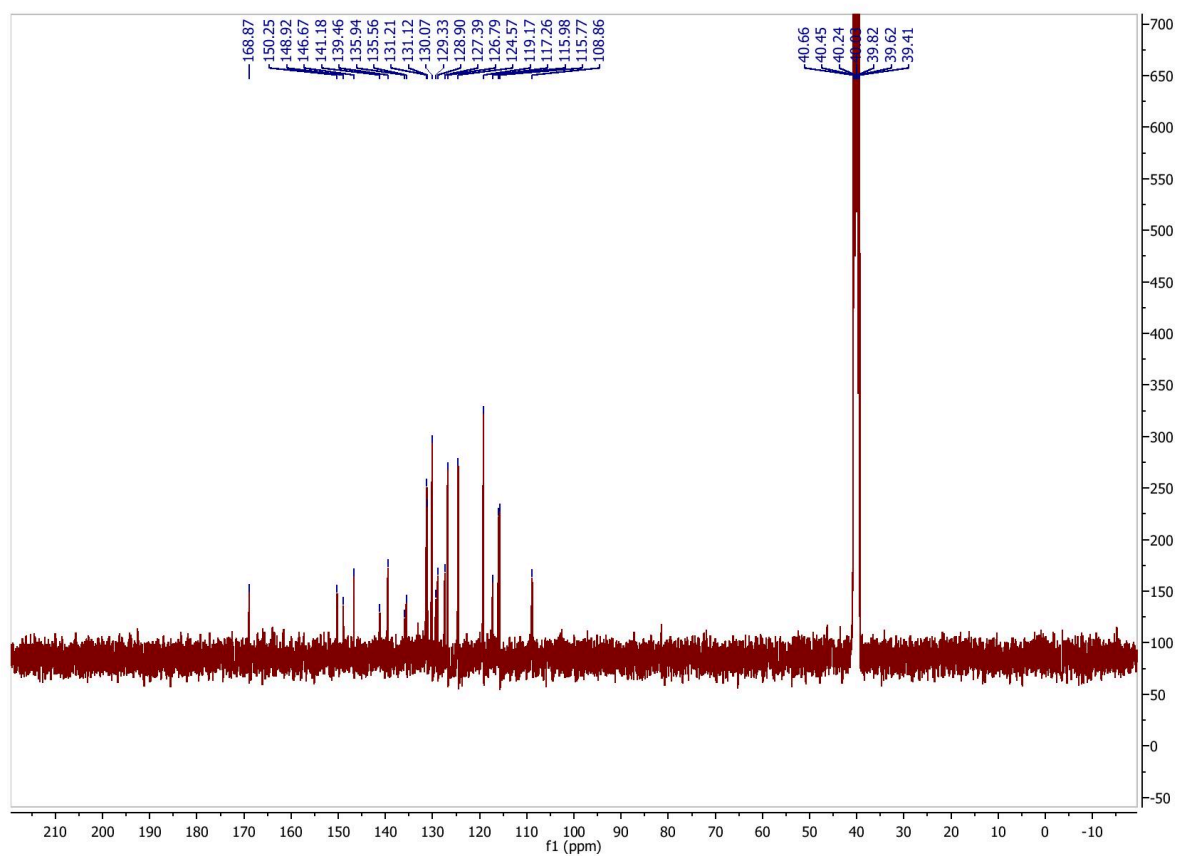

Figure 25:  $^{13}\text{C}$  NMR of 1-((3-(4-Fluorophenyl)-1-phenyl-1*H*-pyrazole-4-yl)methylene)-2-(4-(4-nitrophenyl)thiazol-2-yl)hydrazine (4l)

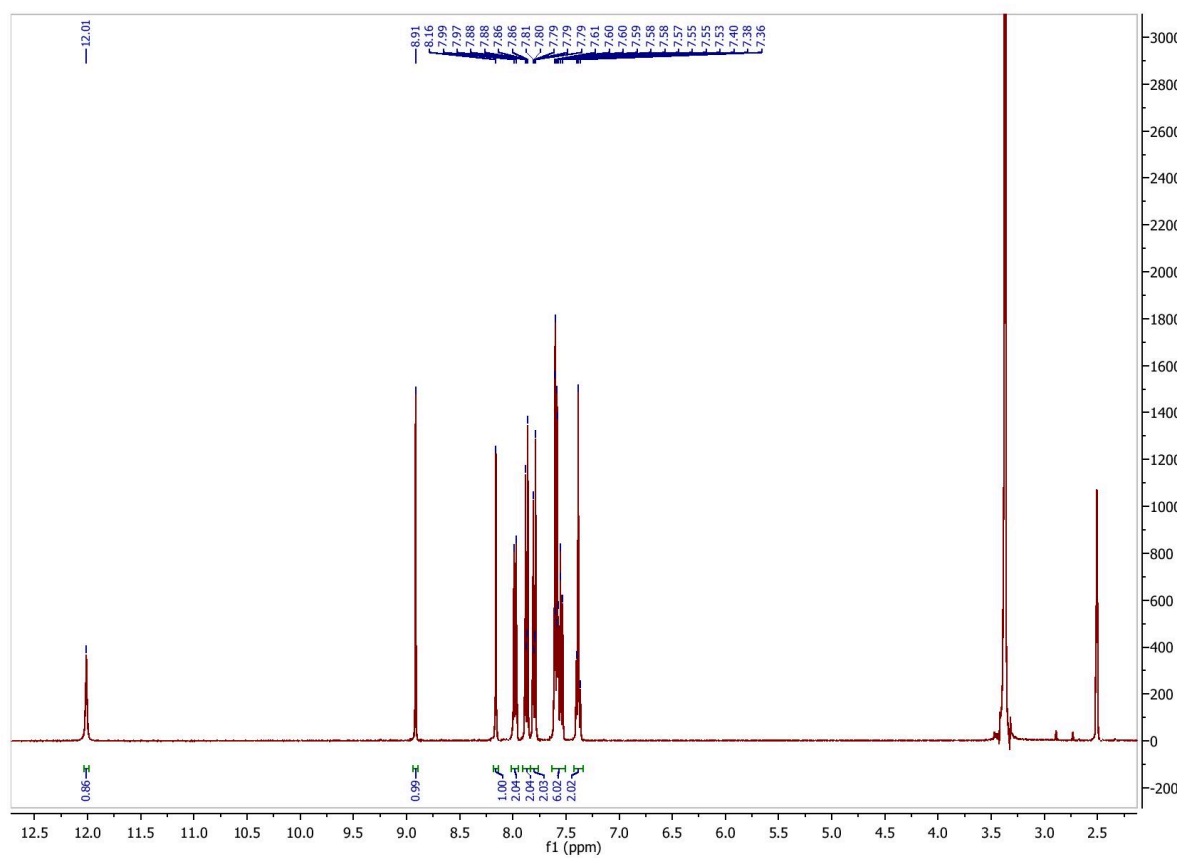

Figure 26:  $^1\text{H}$  NMR of 1-((3-(4-Chlorophenyl)-1-phenyl-1*H*-pyrazole-4-yl)methylene)-2-(4-(4-bromophenyl) thiazol-2-yl)hydrazine (4m)

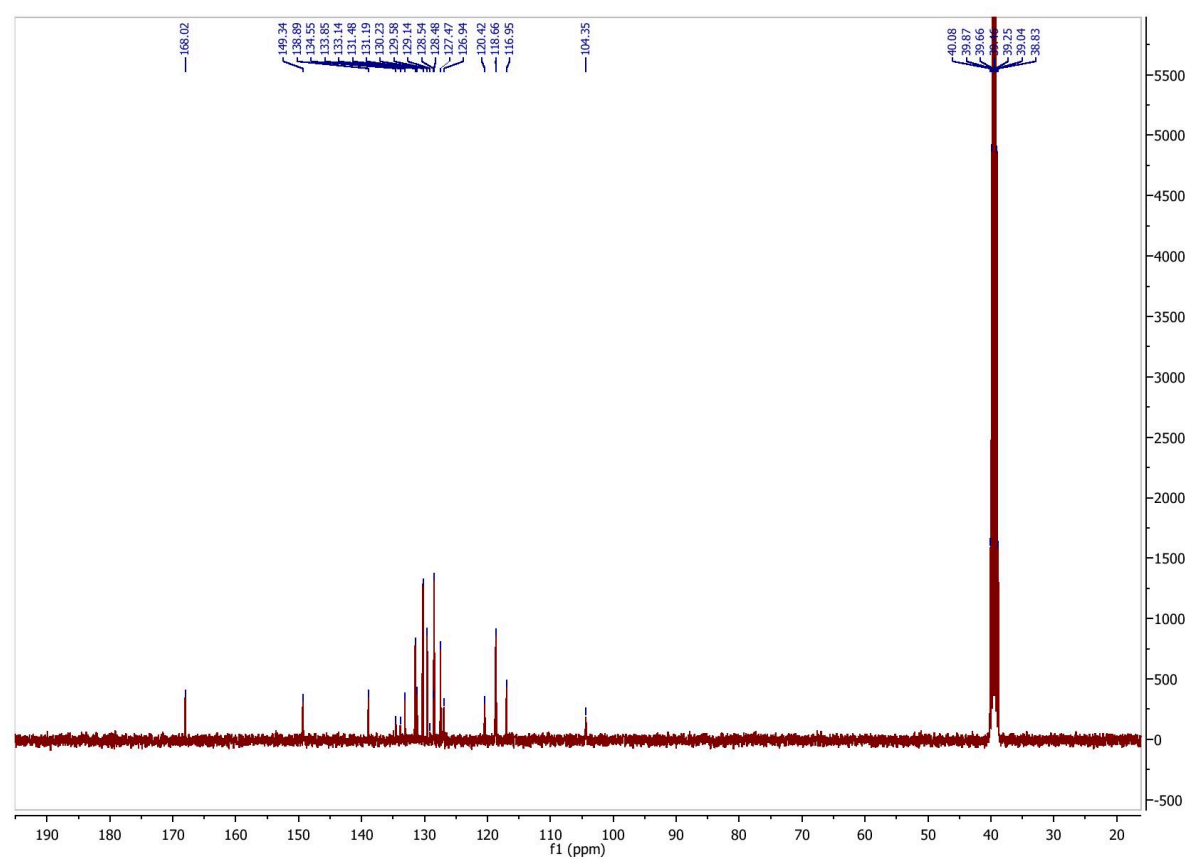

Figure 27:  $^{13}\text{C}$  NMR of 1-((3-(4-Chlorophenyl)-1-phenyl-1*H*-pyrazole-4-yl)methylene)-2-(4-(4-bromophenyl) thiazol-2-yl)hydrazine (4m)

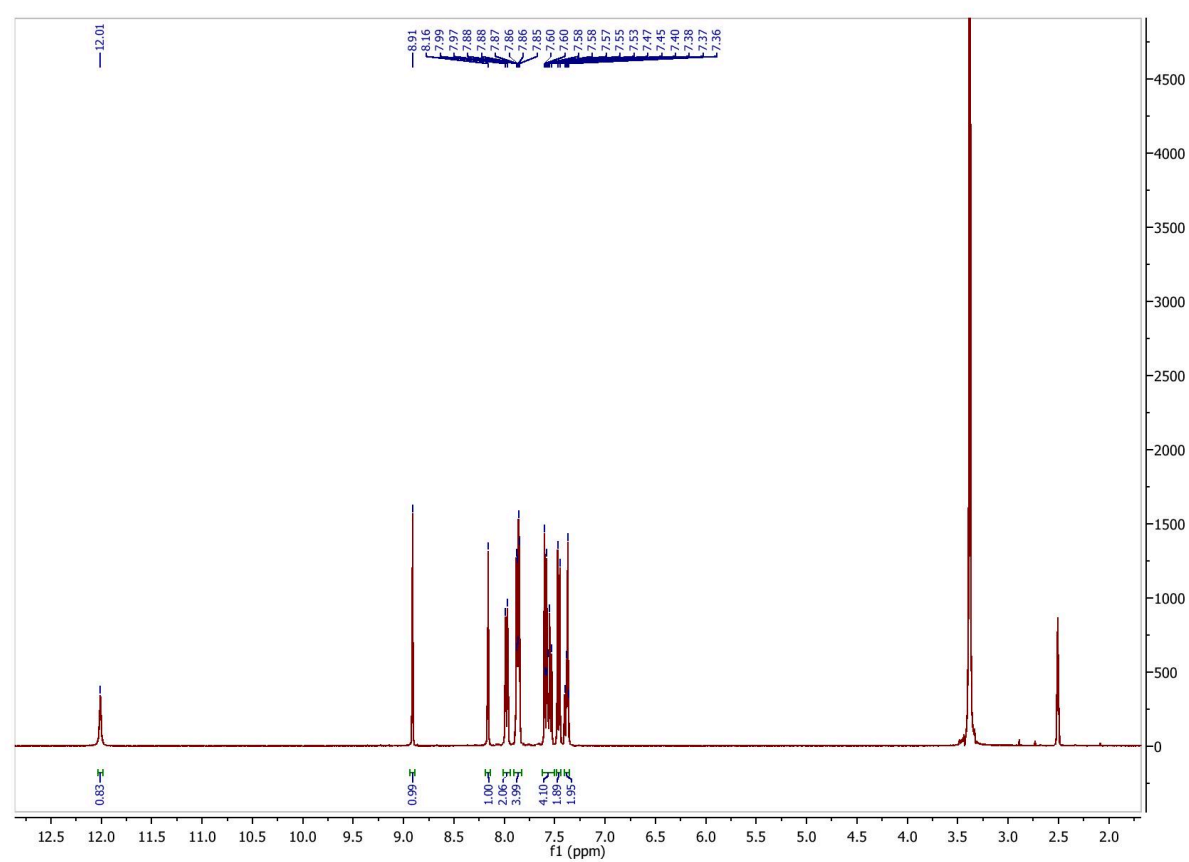

Figure 28:  $^1\text{H}$  NMR of 1-((3-(4-Chlorophenyl)-1-phenyl-1*H*-pyrazole-4-yl)methylene)-2-(4-(4-chlorophenyl) thiazol-2-yl)hydrazine (4n)

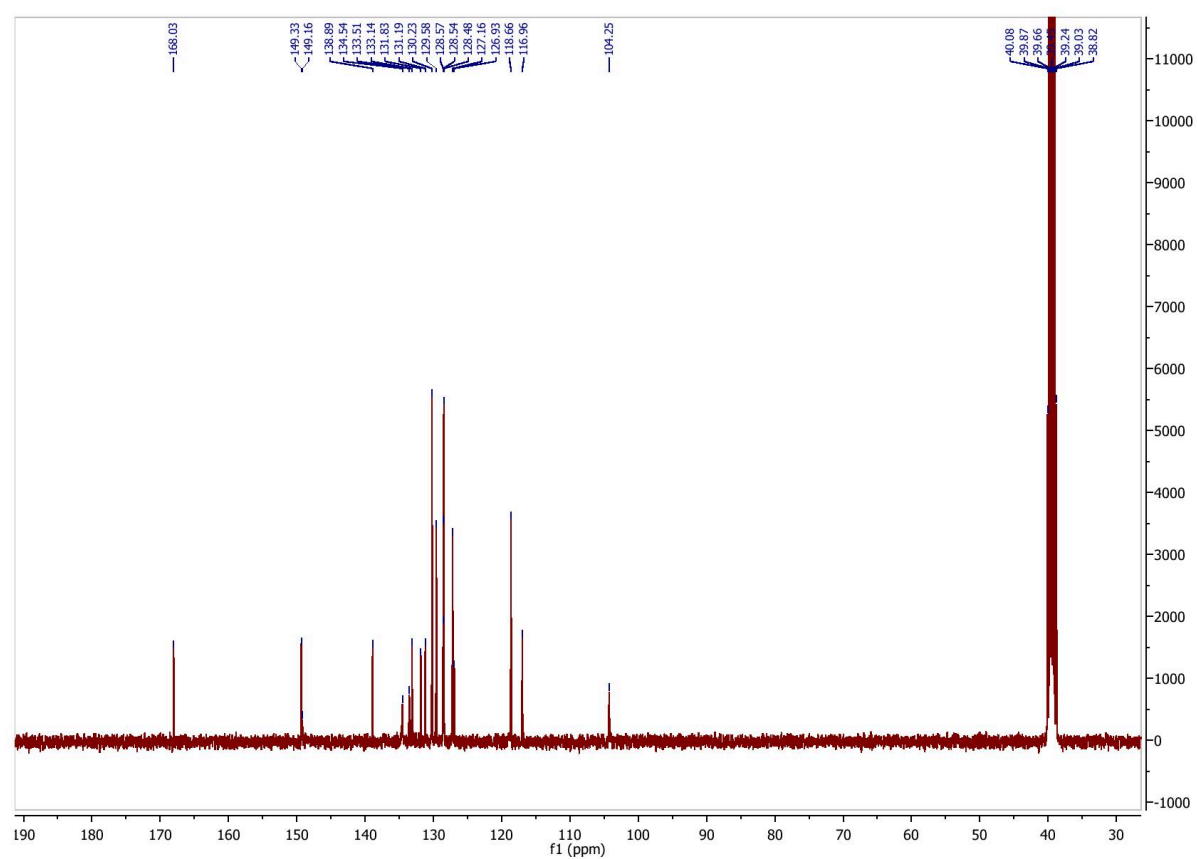

**Figure 29:**  $^{13}\text{C}$  NMR of 1-((3-(4-Chlorophenyl)-1-phenyl-1H-pyrazole-4-yl)methylene)-2-(4-(4-chlorophenyl) thiazol-2-yl)hydrazine (4n)

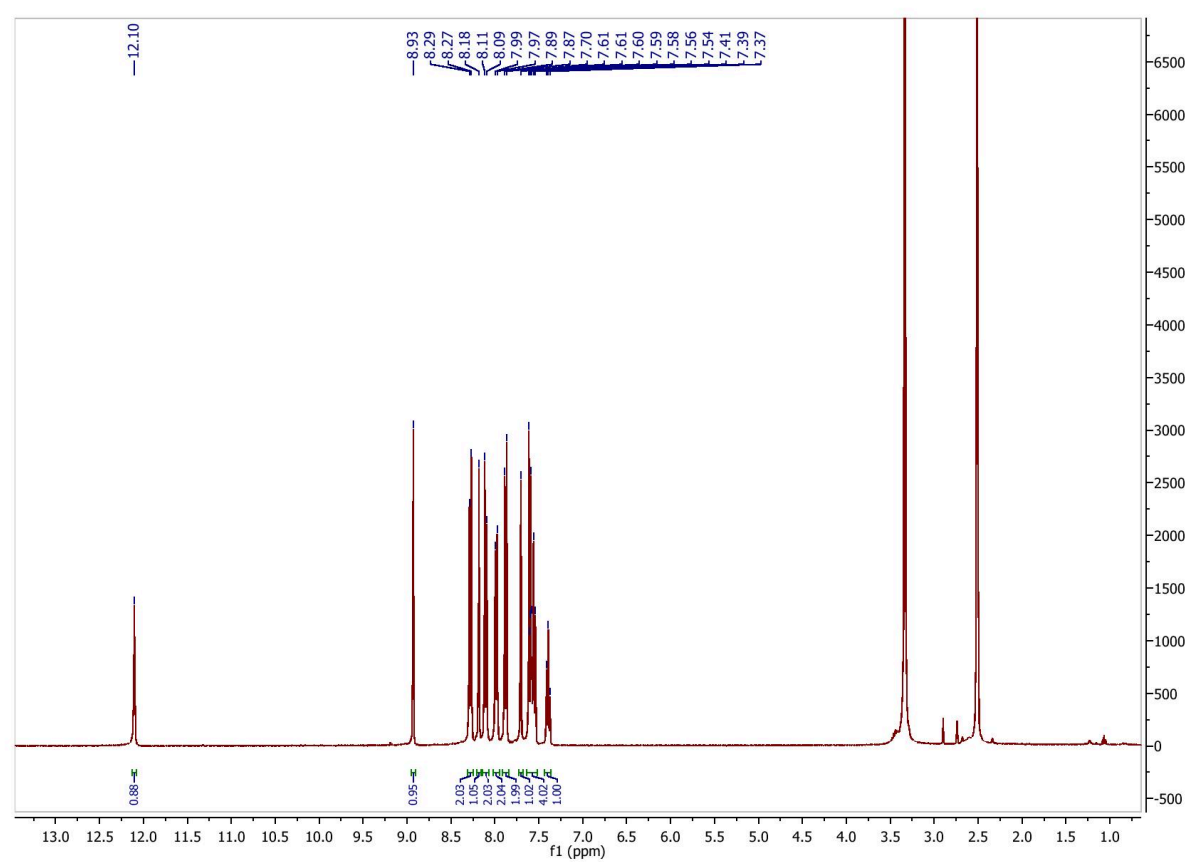

**Figure 30:**  $^1\text{H}$  NMR of 1-((3-(4-Chlorophenyl)-1-phenyl-1H-pyrazole-4-yl)methylene)-2-(4-(4-nitrophenyl)thiazol-2-yl)hydrazine (4o)

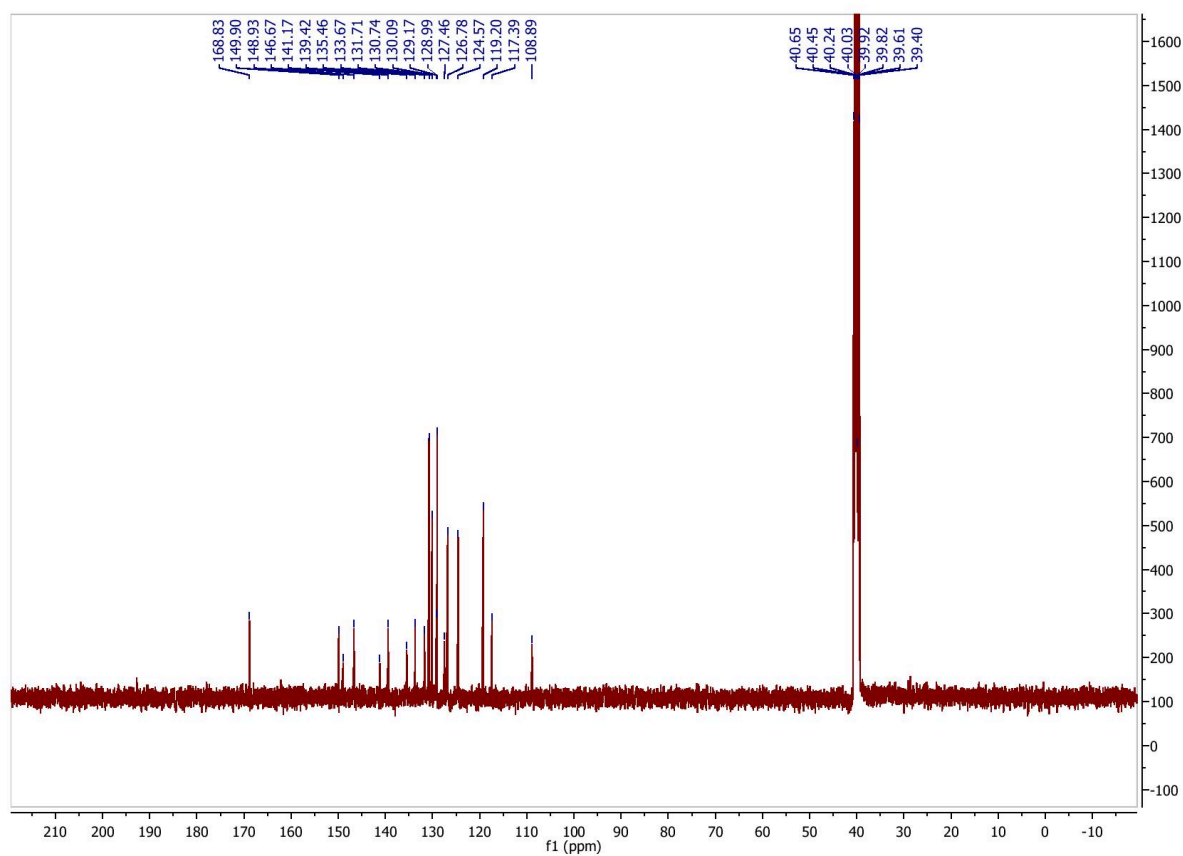

Figure 31:  $^{13}\text{C}$  NMR of 1-((3-(4-Chlorophenyl)-1-phenyl-1H-pyrazole-4-yl)methylene)-2-(4-(4-nitrophenyl)thiazol-2-yl)hydrazine (4o)

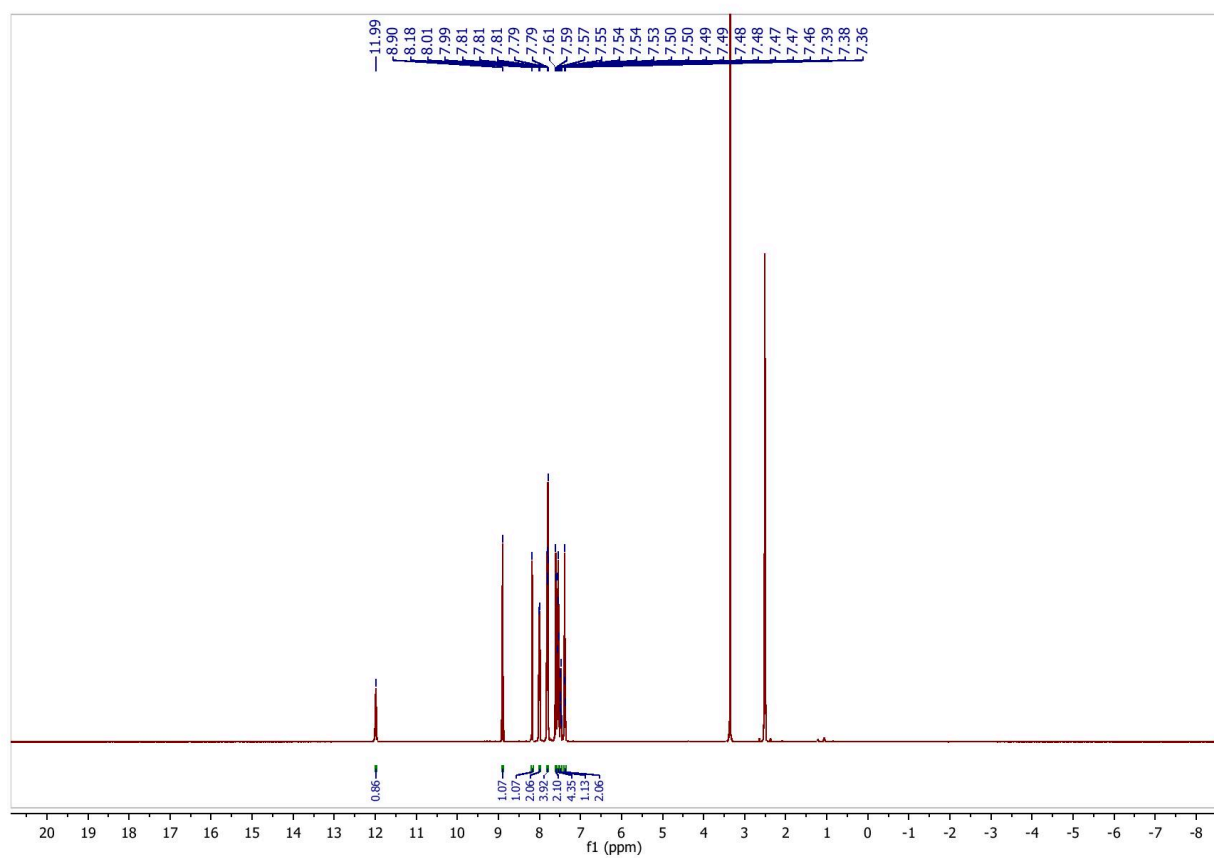

Figure 32:  $^1\text{H}$  NMR of ((1,3-Diphenyl-1H-pyrazol-4-yl)methylene)-2-(4-(4-bromophenyl)thiazol-2-yl)hydrazine (4p)

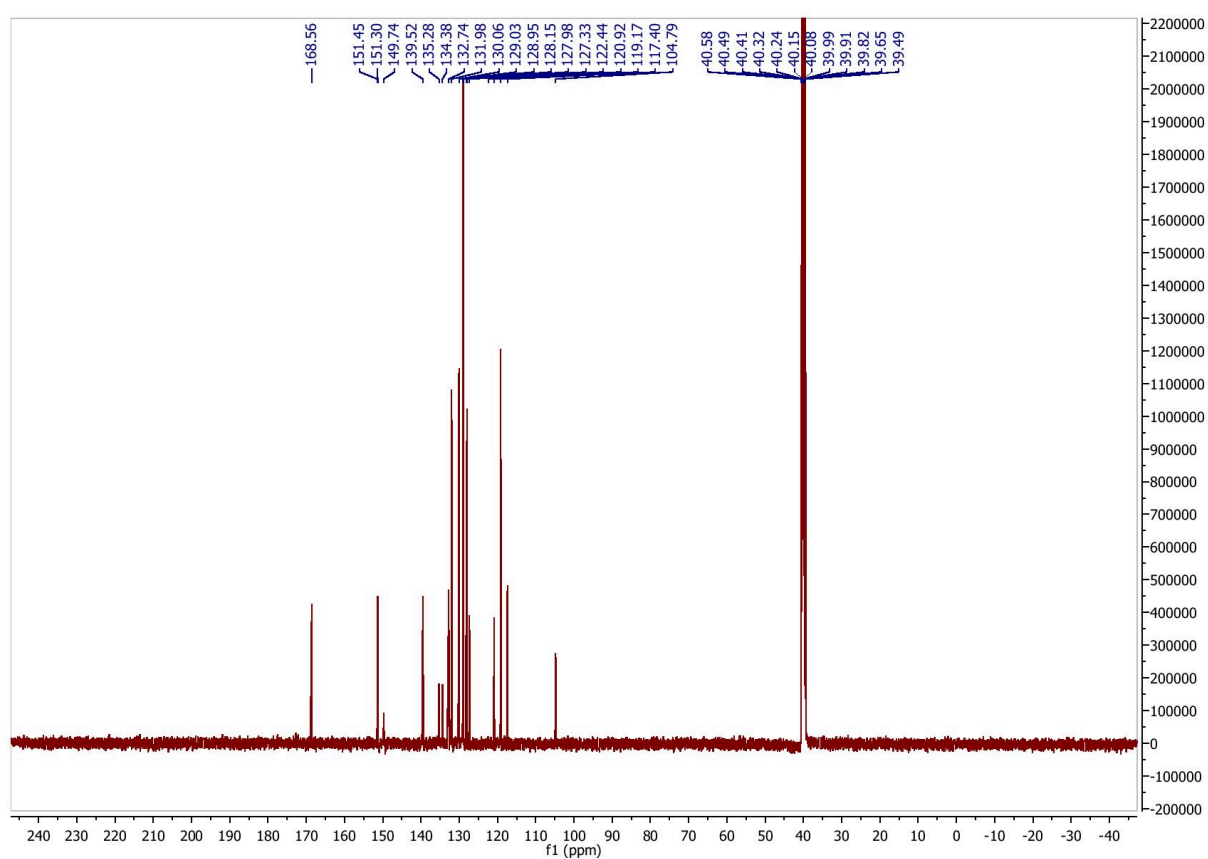

Figure 33:  $^{13}\text{C}$  NMR of ((1,3-Diphenyl-1H-pyrazol-4-yl)methylene)-2-(4-(4-bromophenyl)thiazol-2-yl)hydrazine (4p)

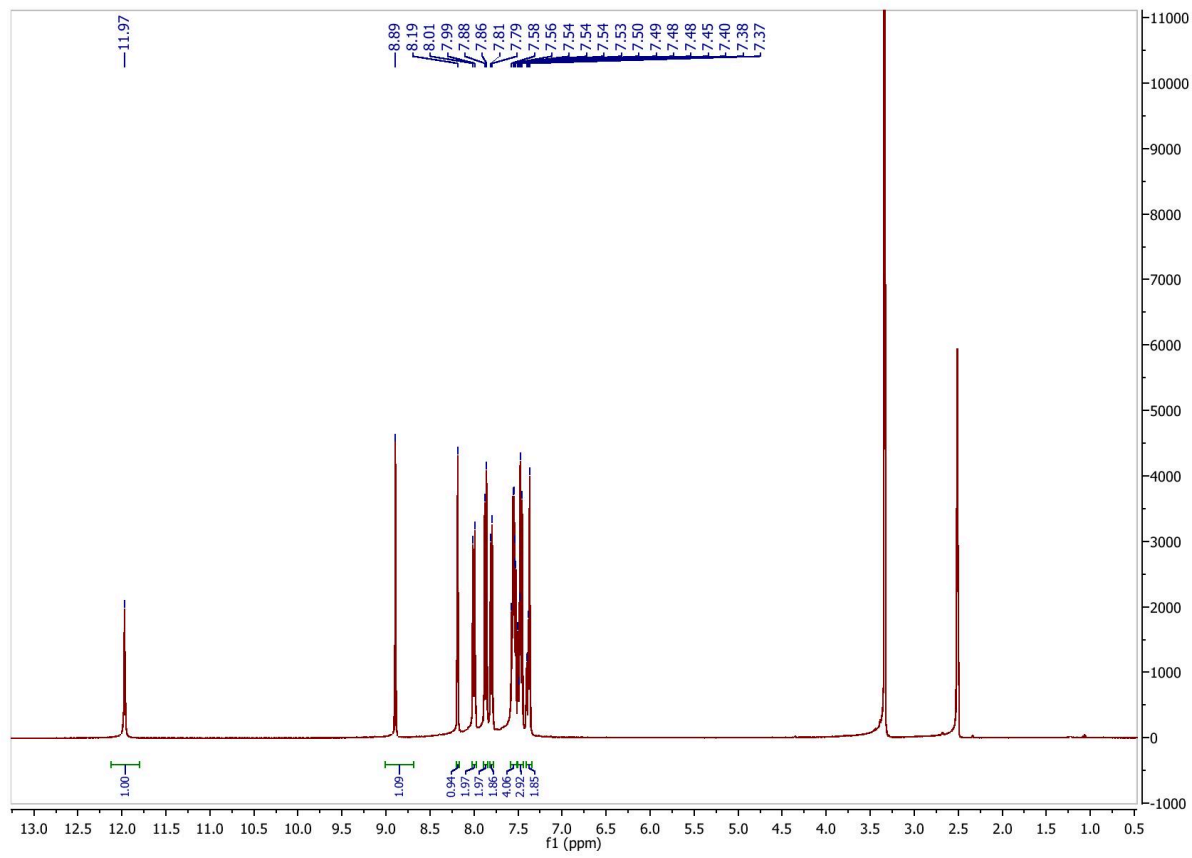

Figure 34:  $^1\text{H}$  NMR of ((1,3-Diphenyl-1H-pyrazol-4-yl)methylene)-2-(4-(4-chlorophenyl)thiazol-2-yl)hydrazine (4q)

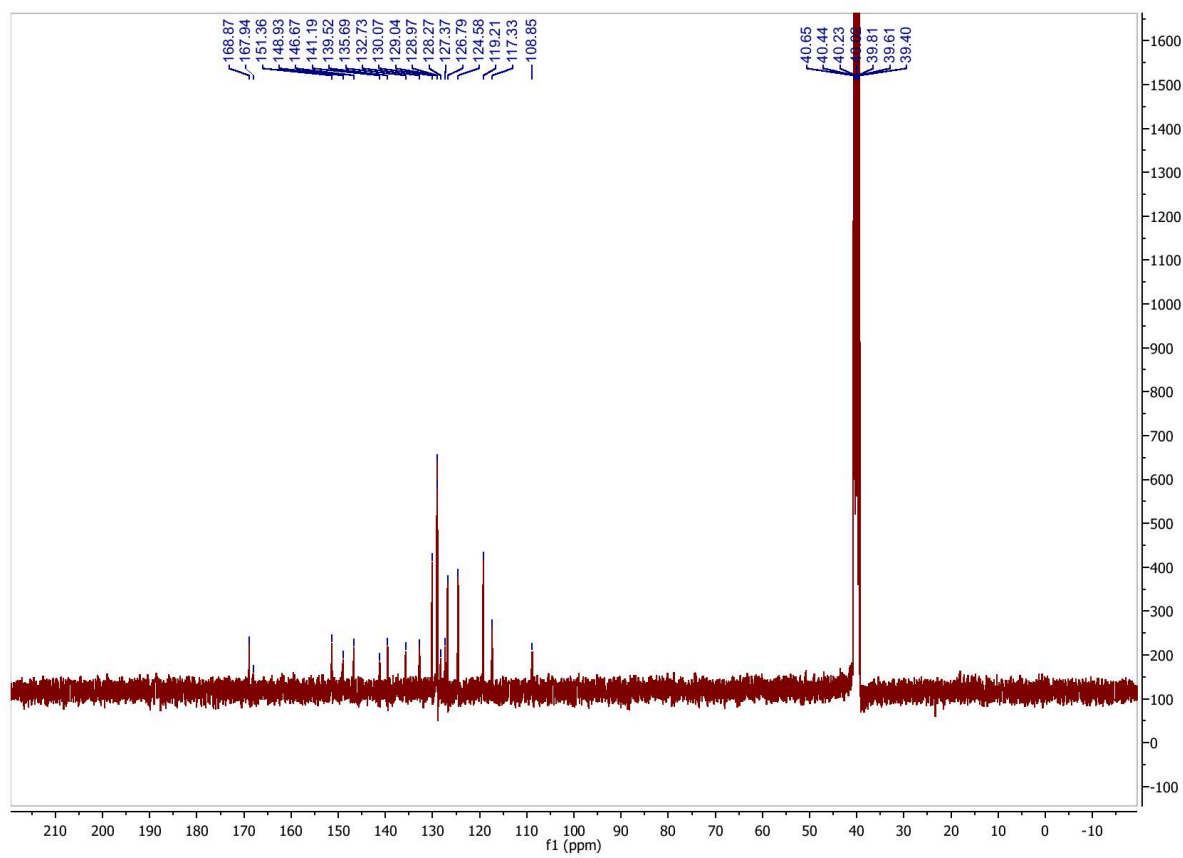

Figure 35:  $^{13}\text{C}$  NMR of ((1,3-Diphenyl-1H-pyrazol-4-yl)methylene)-2-(4-(4-chlorophenyl)thiazol-2-yl)hydrazine (4q)

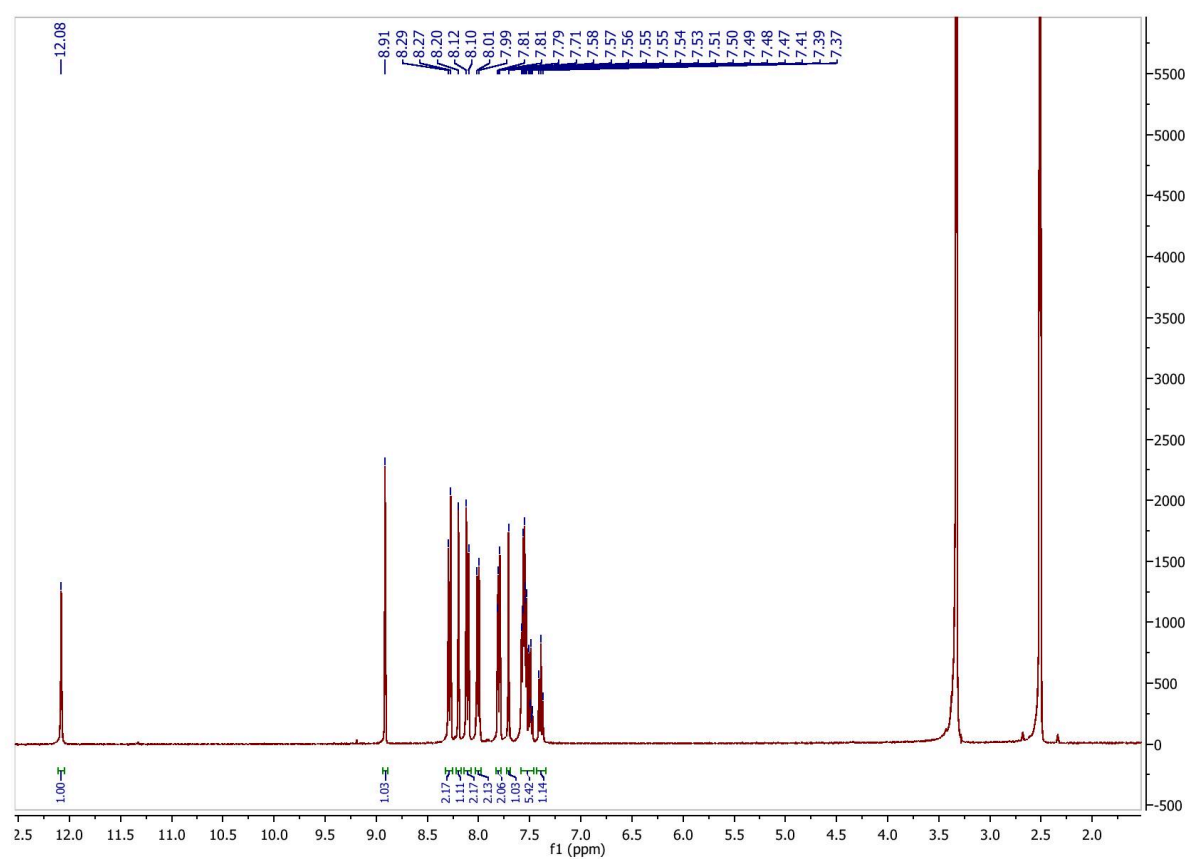

Figure 36:  $^1\text{H}$  NMR of ((1,3-Diphenyl-1*H*-pyrazol-4-yl)methylene)-2-(4-(4-nitrophenyl)thiazol-2-yl) (4r)

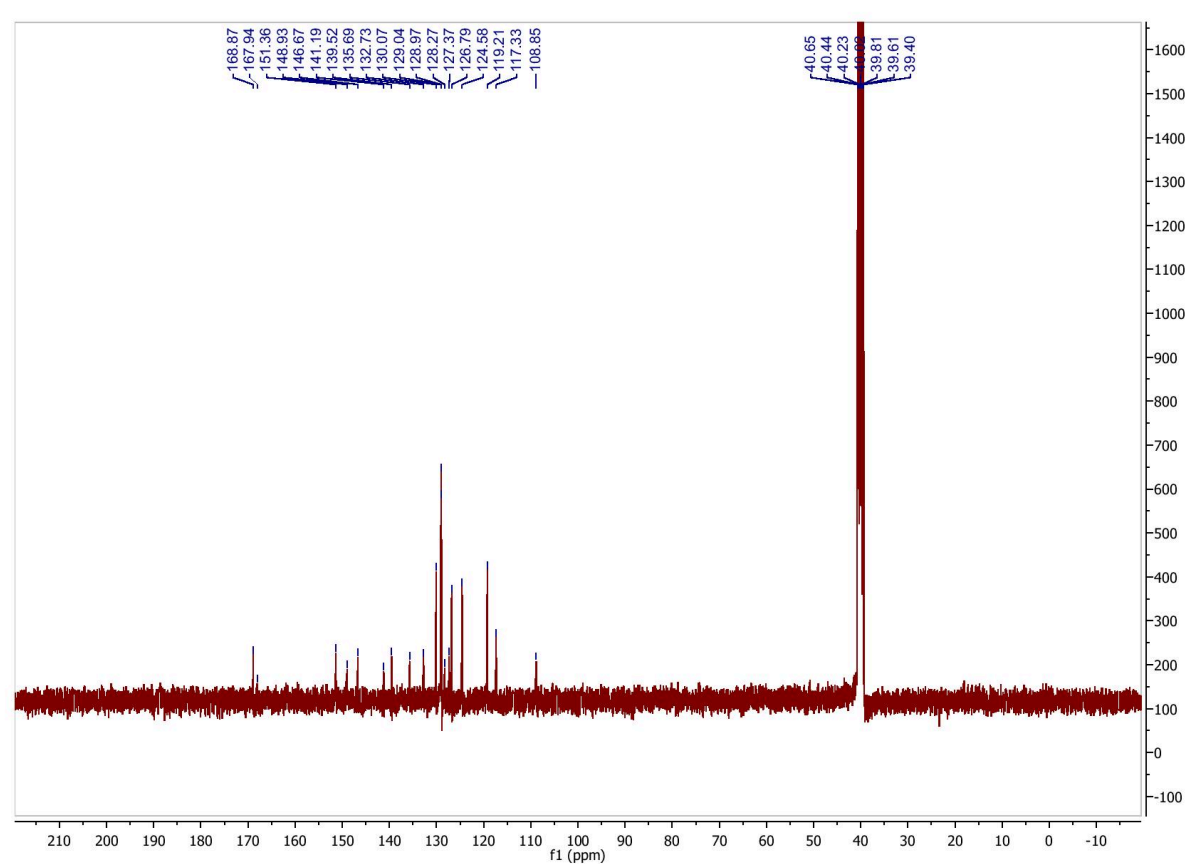

Figure 37:  $^{13}\text{C}$  NMR of ((1,3-Diphenyl-1*H*-pyrazol-4-yl)methylene)-2-(4-(4-nitrophenyl)thiazol-2-yl) (4r)



Alegaon, S. G., Hirpara, M. B., Alagawadi, K., Jalalpure, S., Rasal, V., Salve, P. S. & Kumbar, V. (2017). Synthesis and biological evaluation of 1, 3, 4-trisubstituted pyrazole analogues as anti-mycobacterial agents. *Med. Chem. Res.* 26: 1127-1138.
